# Supplementary material for: Dynamic Proteomic Analysis of Pancreatic Mesenchyme Reveals Novel Factors That Enhance Human Embryonic Stem Cell to Pancreatic Cell Differentiation
Source: Hindawi journal article supplement (doi:10.1155/2016/6183562), 2015-11-22
Supplement: f1 [file 6183562.f1.pdf]

| protein | annotation                                                                                                       | FDR   |       |      |      |
|---------|------------------------------------------------------------------------------------------------------------------|-------|-------|------|------|
|         |                                                                                                                  | e15.5 | e17.5 | p2   | p14  |
| A2ABG4  | TBC1 domain family, member 16 OS=Mus musculus GN=Tbc1d16 PE=4 SV=1                                               | 1.00  | 1.00  | 1.00 | 1.00 |
| A2ARZ3  | Fibrous sheath-interacting protein 2 OS=Mus musculus GN=Fspip2 PE=1 SV=3                                         | 1.00  | 0.05  | 1.00 | 1.00 |
| A2ASQ1  | Agriin OS=Mus musculus GN=Agriin PE=2 SV=1                                                                       | 0.07  | 1.00  | 1.00 | 1.00 |
| A8DUK4  | Beta-globin OS=Mus musculus GN=Hbb-b1 PE=3 SV=1                                                                  | 1.00  | 0.00  | 0.00 | 0.00 |
| B2RS76  | Carboxypeptidase B1 (Tissue) OS=Mus musculus GN=Cpb1 PE=2 SV=1                                                   | 1.00  | 0.00  | 0.00 | 0.00 |
| B2RX14  | Terminal uridylyltransferase 4 OS=Mus musculus GN=Zcchc11 PE=1 SV=2                                              | 1.00  | 1.00  | 1.00 | 0.06 |
| B7ZNL3  | Tpm1 protein OS=Mus musculus GN=Tpm1 PE=2 SV=1                                                                   | 1.00  | 0.03  | 0.02 | 0.02 |
| D3YY62  | Uncharacterized protein OS=Mus musculus GN=Gm9858 PE=4 SV=1                                                      | 0.03  | 0.03  | 0.02 | 1.00 |
| D3Z5Y1  | Uncharacterized protein OS=Mus musculus GN=Stard13 PE=4 SV=1                                                     | 0.03  | 1.00  | 1.00 | 1.00 |
| D3Z6P0  | Protein disulfide-isomerase A2 OS=Mus musculus GN=Pdia2 PE=1 SV=1                                                | 1.00  | 0.02  | 0.00 | 0.00 |
| E9PUV7  | Uncharacterized protein OS=Mus musculus GN=4930485B16Rik PE=4 SV=1                                               | 1.00  | 0.08  | 1.00 | 1.00 |
| E9PVM7  | Uncharacterized protein OS=Mus musculus GN=Gstm5 PE=3 SV=1                                                       | 1.00  | 1.00  | 1.00 | 0.03 |
| E9PVZ3  | Uncharacterized protein OS=Mus musculus GN=Ccdc144b PE=4 SV=1                                                    | 1.00  | 1.00  | 1.00 | 0.04 |
| E9PZQ0  | Uncharacterized protein OS=Mus musculus GN=Ryr1 PE=4 SV=1                                                        | 1.00  | 0.07  | 1.00 | 0.04 |
| E9Q191  | Uncharacterized protein OS=Mus musculus GN=Oifr288 PE=3 SV=1                                                     | 1.00  | 1.00  | 0.08 | 1.00 |
| E9Q1Y9  | Uncharacterized protein OS=Mus musculus GN=5430421N21Rik PE=3 SV=1                                               | 1.00  | 0.00  | 1.00 | 1.00 |
| E9Q447  | Uncharacterized protein OS=Mus musculus GN=Spna2 PE=4 SV=1                                                       | 1.00  | 0.00  | 0.00 | 0.00 |
| E9Q455  | Uncharacterized protein OS=Mus musculus GN=Tpm1 PE=3 SV=1                                                        | 1.00  | 0.03  | 0.02 | 0.00 |
| E9Q557  | Desmoplakin OS=Mus musculus GN=Dsp PE=3 SV=1                                                                     | 1.00  | 0.00  | 0.00 | 0.00 |
| E9Q616  | Uncharacterized protein OS=Mus musculus GN=Ahnak PE=4 SV=1                                                       | 1.00  | 0.00  | 0.00 | 0.00 |
| E9Q7L1  | Uncharacterized protein OS=Mus musculus GN=Urb2 PE=4 SV=1                                                        | 0.01  | 0.01  | 0.02 | 1.00 |
| E9Q9C6  | Uncharacterized protein OS=Mus musculus GN=Fgcbp PE=4 SV=1                                                       | 1.00  | 0.03  | 1.00 | 1.00 |
| F6Q3G7  | Uncharacterized protein (Fragment) OS=Mus musculus GN=Upf2 PE=4 SV=1                                             | 0.03  | 0.03  | 1.00 | 1.00 |
| F6R5A0  | Uncharacterized protein (Fragment) OS=Mus musculus GN=D1Ert622e PE=4 SV=1                                        | 1.00  | 0.04  | 1.00 | 1.00 |
| F6VBB8  | Uncharacterized protein (Fragment) OS=Mus musculus PE=4 SV=1                                                     | 0.02  | 0.03  | 0.03 | 1.00 |
| F6W6S4  | Uncharacterized protein (Fragment) OS=Mus musculus GN=Hpn PE=4 SV=1                                              | 1.00  | 1.00  | 0.04 | 1.00 |
| F7DBB3  | Uncharacterized protein (Fragment) OS=Mus musculus GN=Ahnak2 PE=4 SV=1                                           | 1.00  | 1.00  | 1.00 | 0.00 |
| O08547  | Vesicle-trafficking protein SEC22b OS=Mus musculus GN=Sec22b PE=1 SV=3                                           | 1.00  | 1.00  | 1.00 | 0.02 |
| O08553  | Dihydropyrimidinase-related protein 2 OS=Mus musculus GN=Dpysl2 PE=1 SV=2                                        | 1.00  | 0.02  | 0.02 | 0.00 |
| O08749  | Dihydrolipoyl dehydrogenase, mitochondrial OS=Mus musculus GN=Dld PE=1 SV=2                                      | 1.00  | 1.00  | 0.08 | 1.00 |
| O08795  | Glucosidase 2 subunit beta OS=Mus musculus GN=Prksh PE=1 SV=1                                                    | 0.02  | 0.00  | 1.00 | 0.06 |
| O08807  | Peroxisomal protein OS=Mus musculus GN=Prdx4 PE=1 SV=1                                                           | 1.00  | 0.00  | 0.02 | 1.00 |
| O35074  | Prostacyclin synthase OS=Mus musculus GN=Ptgis PE=2 SV=1                                                         | 1.00  | 1.00  | 1.00 | 0.00 |
| O35098  | Dihydropyrimidinase-related protein 4 OS=Mus musculus GN=Dpysl4 PE=1 SV=1                                        | 1.00  | 1.00  | 1.00 | 0.02 |
| O35129  | Prohibitin-2 OS=Mus musculus GN=Phb2 PE=1 SV=1                                                                   | 1.00  | 0.02  | 0.02 | 1.00 |
| O35326  | Serine/arginine-rich splicing factor 5 OS=Mus musculus GN=Srsf5 PE=1 SV=1                                        | 1.00  | 1.00  | 0.02 | 1.00 |
| O35350  | Calpain-1 catalytic subunit OS=Mus musculus GN=Capn1 PE=2 SV=1                                                   | 1.00  | 1.00  | 1.00 | 0.07 |
| O35381  | Acidic leucine-rich nuclear phosphoprotein 32 family member A OS=Mus musculus GN=Anp32a PE=1 SV=1                | 1.00  | 0.00  | 1.00 | 1.00 |
| O35639  | Annexin A3 OS=Mus musculus GN=Anxa3 PE=1 SV=4                                                                    | 1.00  | 1.00  | 1.00 | 0.00 |
| O35640  | Annexin A8 OS=Mus musculus GN=Anxa8 PE=2 SV=2                                                                    | 1.00  | 1.00  | 1.00 | 0.05 |
| O35682  | Myeloid-associated differentiation marker OS=Mus musculus GN=Myadm PE=2 SV=2                                     | 1.00  | 1.00  | 1.00 | 0.02 |
| O35685  | Nuclear migration protein nudC OS=Mus musculus GN=Nudc PE=1 SV=1                                                 | 1.00  | 0.04  | 1.00 | 1.00 |
| O35855  | Branched-chain-amino-acid aminotransferase, mitochondrial OS=Mus musculus GN=Bcat2 PE=2 SV=2                     | 1.00  | 0.03  | 1.00 | 1.00 |
| O35887  | Calumenin OS=Mus musculus GN=Calu PE=1 SV=1                                                                      | 1.00  | 0.00  | 0.00 | 0.00 |
| O54724  | Polymerase I and transcript release factor OS=Mus musculus GN=Ptrf PE=1 SV=1                                     | 1.00  | 1.00  | 0.02 | 0.00 |
| O54734  | Dolichyl-diphosphooligosaccharide--protein glycosyltransferase 48 kDa subunit OS=Mus musculus GN=Ddost PE=1 SV=1 | 1.00  | 0.02  | 1.00 | 0.00 |
| O54754  | Aldehyde oxidase OS=Mus musculus GN=Aox1 PE=2 SV=2                                                               | 0.04  | 1.00  | 1.00 | 1.00 |
| O54879  | High mobility group protein B3 OS=Mus musculus GN=Hmgb3 PE=2 SV=3                                                | 1.00  | 1.00  | 0.02 | 1.00 |
| O54962  | Barrier-to-autointegration factor OS=Mus musculus GN=Banf1 PE=1 SV=1                                             | 0.02  | 1.00  | 1.00 | 1.00 |
| O55022  | Membrane-associated progesterone receptor component 1 OS=Mus musculus GN=Pgrmc1 PE=1 SV=4                        | 1.00  | 0.02  | 1.00 | 1.00 |
| O55023  | Inositol monophosphatase 1 OS=Mus musculus GN=Impa1 PE=1 SV=1                                                    | 1.00  | 1.00  | 1.00 | 0.07 |
| O55026  | Ectonucleoside triphosphate diphosphohydrolase 2 OS=Mus musculus GN=Entpd2 PE=1 SV=2                             | 1.00  | 1.00  | 1.00 | 0.00 |
| O55029  | Coatomer subunit beta' OS=Mus musculus GN=Copb2 PE=2 SV=2                                                        | 1.00  | 1.00  | 1.00 | 0.02 |
| O55131  | Septin-7 OS=Mus musculus GN=Sept7 PE=1 SV=1                                                                      | 1.00  | 1.00  | 0.00 | 0.02 |
| O55142  | 60S ribosomal protein L35a OS=Mus musculus GN=Rpl35a PE=2 SV=2                                                   | 1.00  | 1.00  | 0.02 | 0.02 |
| O55234  | Proteasome subunit beta type-5 OS=Mus musculus GN=Psb5 PE=1 SV=3                                                 | 1.00  | 0.02  | 0.00 | 1.00 |
| O70251  | Elongation factor 1-beta OS=Mus musculus GN=Eef1b PE=1 SV=5                                                      | 0.02  | 0.00  | 1.00 | 0.00 |
| O70318  | Band 4.1-like protein 2 OS=Mus musculus GN=Epb41l2 PE=1 SV=1                                                     | 1.00  | 0.05  | 1.00 | 1.00 |
| O70435  | Proteasome subunit alpha type-3 OS=Mus musculus GN=Psa3 PE=1 SV=3                                                | 1.00  | 0.02  | 0.02 | 1.00 |
| O70456  | 14-3-3 protein sigma OS=Mus musculus GN=Sfn PE=1 SV=2                                                            | 1.00  | 1.00  | 0.02 | 1.00 |
| O70475  | UDP-glucose 6-dehydrogenase OS=Mus musculus GN=Ugdh PE=1 SV=1                                                    | 1.00  | 0.00  | 0.00 | 0.00 |
| O70492  | Sorting nexin-3 OS=Mus musculus GN=Snx3 PE=1 SV=3                                                                | 1.00  | 1.00  | 0.05 | 1.00 |
| O88342  | WD repeat-containing protein 1 OS=Mus musculus GN=Wdr1 PE=1 SV=3                                                 | 1.00  | 1.00  | 0.06 | 1.00 |
| O88456  | Calpain small subunit 1 OS=Mus musculus GN=Capns1 PE=2 SV=1                                                      | 1.00  | 1.00  | 1.00 | 0.02 |
| O88487  | Cytoplasmic dynein 1 intermediate chain 2 OS=Mus musculus GN=Dync1i2 PE=2 SV=1                                   | 1.00  | 0.00  | 1.00 | 1.00 |
| O88569  | Heterogeneous nuclear ribonucleoproteins A2/B1 OS=Mus musculus GN=Hnmpa2b1 PE=1 SV=2                             | 1.00  | 0.00  | 0.00 | 0.00 |
| O88844  | Isocitrate dehydrogenase [NADP] cytoplasmic OS=Mus musculus GN=Idh1 PE=1 SV=2                                    | 1.00  | 0.00  | 0.00 | 0.00 |
| O88962  | 7-alpha-hydroxycholesterol-4-en-3-one 12-alpha-hydroxylase OS=Mus musculus GN=Cyp8b1 PE=2 SV=1                   | 1.00  | 1.00  | 1.00 | 0.07 |
| O89086  | Putative RNA-binding protein 3 OS=Mus musculus GN=Rbm3 PE=1 SV=1                                                 | 0.03  | 0.02  | 0.02 | 1.00 |

|        |                                                                                                      |      |      |      |      |
|--------|------------------------------------------------------------------------------------------------------|------|------|------|------|
| P00683 | Ribonuclease pancreatic OS=Mus musculus GN=Rnase1 PE=1 SV=2                                          | 1.00 | 0.02 | 0.02 | 1.00 |
| P00688 | Pancreatic alpha-amylase OS=Mus musculus GN=Amy2 PE=1 SV=2                                           | 1.00 | 0.00 | 0.00 | 0.00 |
| P04104 | Keratin, type II cytoskeletal 1 OS=Mus musculus GN=Krt1 PE=1 SV=4                                    | 1.00 | 0.02 | 1.00 | 0.02 |
| P04117 | Fatty acid-binding protein, adipocyte OS=Mus musculus GN=Fabp4 PE=1 SV=3                             | 1.00 | 1.00 | 1.00 | 0.00 |
| P05064 | Fructose-bisphosphate aldolase A OS=Mus musculus GN=Aldoa PE=1 SV=2                                  | 0.02 | 0.00 | 0.00 | 0.00 |
| P05202 | Aspartate aminotransferase, mitochondrial OS=Mus musculus GN=Got2 PE=1 SV=1                          | 1.00 | 1.00 | 0.02 | 1.00 |
| P05208 | Chymotrypsin-like elastase family member 2A OS=Mus musculus GN=Cela2a PE=2 SV=1                      | 1.00 | 0.00 | 0.00 | 0.00 |
| P05213 | Tubulin alpha-1B chain OS=Mus musculus GN=Tuba1b PE=1 SV=2                                           | 0.00 | 1.00 | 1.00 | 0.00 |
| P06151 | L-lactate dehydrogenase A chain OS=Mus musculus GN=Ldha PE=1 SV=3                                    | 0.02 | 0.00 | 0.00 | 0.00 |
| P06745 | Glucose-6-phosphate isomerase OS=Mus musculus GN=Gpi PE=1 SV=4                                       | 1.00 | 1.00 | 0.00 | 0.02 |
| P07146 | Anionic trypsin-2 OS=Mus musculus GN=Prss2 PE=2 SV=1                                                 | 1.00 | 0.00 | 0.02 | 0.00 |
| P07356 | Annexin A2 OS=Mus musculus GN=Anxa2 PE=1 SV=2                                                        | 0.00 | 0.00 | 0.00 | 0.00 |
| P07724 | Serum albumin OS=Mus musculus GN=Alb PE=1 SV=3                                                       | 1.00 | 0.02 | 1.00 | 0.00 |
| P07901 | Heat shock protein HSP 90-alpha OS=Mus musculus GN=Hsp90aa1 PE=1 SV=4                                | 0.00 | 0.00 | 0.00 | 0.00 |
| P08003 | Protein disulfide-isomerase A4 OS=Mus musculus GN=Pdia4 PE=1 SV=3                                    | 0.00 | 0.00 | 0.00 | 0.00 |
| P08113 | Endoplasmin OS=Mus musculus GN=Hsp90b1 PE=1 SV=2                                                     | 0.00 | 0.00 | 0.00 | 0.00 |
| P08207 | Protein S100-A10 OS=Mus musculus GN=S100a10 PE=2 SV=2                                                | 1.00 | 0.02 | 0.02 | 0.00 |
| P08228 | Superoxide dismutase [Cu-Zn] OS=Mus musculus GN=Sod1 PE=1 SV=2                                       | 0.02 | 0.00 | 0.00 | 0.00 |
| P08249 | Malate dehydrogenase, mitochondrial OS=Mus musculus GN=Mdh2 PE=1 SV=3                                | 1.00 | 0.00 | 0.00 | 0.00 |
| P08730 | Keratin, type I cytoskeletal 13 OS=Mus musculus GN=Krt13 PE=1 SV=2                                   | 0.03 | 1.00 | 1.00 | 0.02 |
| P08752 | Guanine nucleotide-binding protein (G(i) subunit alpha-2 OS=Mus musculus GN=Gnai2 PE=1 SV=5          | 1.00 | 1.00 | 1.00 | 0.02 |
| P09055 | Integrin beta-1 OS=Mus musculus GN=Itgb1 PE=1 SV=1                                                   | 1.00 | 0.03 | 0.08 | 0.04 |
| P09103 | Protein disulfide-isomerase OS=Mus musculus GN=P4hb PE=1 SV=2                                        | 0.00 | 0.00 | 0.00 | 0.00 |
| P09405 | Nucleolin OS=Mus musculus GN=Ncl PE=1 SV=2                                                           | 0.00 | 0.00 | 0.00 | 0.00 |
| P09411 | Phosphoglycerate kinase 1 OS=Mus musculus GN=Pgk1 PE=1 SV=4                                          | 1.00 | 0.08 | 1.00 | 0.03 |
| P09602 | Non-histone chromosomal protein HMG-17 OS=Mus musculus GN=Hmgn2 PE=1 SV=2                            | 1.00 | 0.00 | 1.00 | 1.00 |
| P10107 | Annexin A1 OS=Mus musculus GN=Anxa1 PE=1 SV=2                                                        | 1.00 | 1.00 | 0.00 | 0.00 |
| P10126 | Elongation factor 1-alpha 1 OS=Mus musculus GN=Eef1a1 PE=1 SV=3                                      | 0.00 | 0.00 | 0.00 | 0.00 |
| P10639 | Thioredoxin OS=Mus musculus GN=Txn PE=1 SV=3                                                         | 0.02 | 0.00 | 0.00 | 0.00 |
| P10649 | Glutathione S-transferase Mu 1 OS=Mus musculus GN=Gstm1 PE=1 SV=2                                    | 1.00 | 0.00 | 0.00 | 0.00 |
| P10922 | Histone H1.0 OS=Mus musculus GN=H1f0 PE=2 SV=4                                                       | 0.02 | 0.00 | 0.00 | 0.00 |
| P11031 | Activated RNA polymerase II transcriptional coactivator p15 OS=Mus musculus GN=Sub1 PE=1 SV=3        | 0.02 | 0.00 | 0.02 | 1.00 |
| P11499 | Heat shock protein HSP 90-beta OS=Mus musculus GN=Hsp90ab1 PE=1 SV=3                                 | 0.05 | 0.00 | 0.00 | 0.00 |
| P11688 | Integrin alpha-5 OS=Mus musculus GN=Itga5 PE=1 SV=3                                                  | 1.00 | 0.04 | 0.02 | 1.00 |
| P12970 | 60S ribosomal protein L7a OS=Mus musculus GN=Rpl7a PE=2 SV=2                                         | 1.00 | 0.00 | 0.02 | 0.00 |
| P13020 | Gelsolin OS=Mus musculus GN=Gsn PE=1 SV=3                                                            | 0.05 | 0.00 | 0.00 | 0.00 |
| P14069 | Protein S100-A6 OS=Mus musculus GN=S100a6 PE=1 SV=3                                                  | 0.04 | 0.02 | 0.02 | 0.03 |
| P14115 | 60S ribosomal protein L27a OS=Mus musculus GN=Rpl27a PE=2 SV=5                                       | 1.00 | 0.02 | 1.00 | 0.02 |
| P14131 | 40S ribosomal protein S16 OS=Mus musculus GN=Rps16 PE=2 SV=4                                         | 1.00 | 0.00 | 0.02 | 0.05 |
| P14148 | 60S ribosomal protein L7 OS=Mus musculus GN=Rpl7 PE=2 SV=2                                           | 1.00 | 0.06 | 1.00 | 0.02 |
| P14152 | Malate dehydrogenase, cytoplasmic OS=Mus musculus GN=Mdh1 PE=1 SV=3                                  | 0.02 | 0.00 | 0.00 | 0.00 |
| P14206 | 40S ribosomal protein SA OS=Mus musculus GN=Rpsa PE=1 SV=4                                           | 0.00 | 0.00 | 0.00 | 0.00 |
| P14211 | Calreticulin OS=Mus musculus GN=Calr PE=1 SV=1                                                       | 0.00 | 0.00 | 0.00 | 0.00 |
| P14431 | H-2 class I histocompatibility antigen, Q9 alpha chain (Fragment) OS=Mus musculus GN=H2-Q9 PE=2 SV=1 | 1.00 | 0.04 | 1.00 | 1.00 |
| P14733 | Lamin-B1 OS=Mus musculus GN=Lmnb1 PE=1 SV=3                                                          | 0.00 | 0.00 | 0.00 | 0.00 |
| P14824 | Annexin A6 OS=Mus musculus GN=Anxa6 PE=1 SV=3                                                        | 0.03 | 0.00 | 0.00 | 0.00 |
| P14869 | 60S acidic ribosomal protein P0 OS=Mus musculus GN=Rplp0 PE=1 SV=3                                   | 0.02 | 0.00 | 0.02 | 0.00 |
| P15626 | Glutathione S-transferase Mu 2 OS=Mus musculus GN=Gstm2 PE=1 SV=2                                    | 1.00 | 0.02 | 0.00 | 0.00 |
| P15864 | Histone H1.2 OS=Mus musculus GN=Hist1h1c PE=1 SV=2                                                   | 0.00 | 0.00 | 0.00 | 0.00 |
| P15947 | Kallikrein-1 OS=Mus musculus GN=Klk1 PE=1 SV=3                                                       | 1.00 | 1.00 | 0.02 | 1.00 |
| P16045 | Galectin-1 OS=Mus musculus GN=Lgals1 PE=1 SV=3                                                       | 0.02 | 0.00 | 0.00 | 0.00 |
| P16858 | Glyceraldehyde-3-phosphate dehydrogenase OS=Mus musculus GN=Gapdh PE=1 SV=2                          | 0.02 | 0.00 | 0.02 | 0.00 |
| P17047 | Lysosome-associated membrane glycoprotein 2 OS=Mus musculus GN=Lamp2 PE=2 SV=2                       | 1.00 | 1.00 | 0.07 | 1.00 |
| P17182 | Alpha-enolase OS=Mus musculus GN=Eno1 PE=1 SV=3                                                      | 0.00 | 0.00 | 0.00 | 0.00 |
| P17742 | Peptidyl-prolyl cis-trans isomerase A OS=Mus musculus GN=Ppia PE=1 SV=2                              | 0.06 | 0.00 | 0.00 | 0.00 |
| P17751 | Triosephosphate isomerase OS=Mus musculus GN=Tpi1 PE=1 SV=3                                          | 0.00 | 0.00 | 0.00 | 0.00 |
| P17897 | Lysozyme C-1 OS=Mus musculus GN=Lyz1 PE=1 SV=1                                                       | 1.00 | 1.00 | 1.00 | 0.03 |
| P17918 | Proliferating cell nuclear antigen OS=Mus musculus GN=Pcna PE=1 SV=2                                 | 0.02 | 0.00 | 0.02 | 1.00 |
| P18242 | Cathepsin D OS=Mus musculus GN=Ctsd PE=1 SV=1                                                        | 1.00 | 1.00 | 1.00 | 0.02 |
| P18572 | Basigin OS=Mus musculus GN=Bsg PE=1 SV=2                                                             | 1.00 | 1.00 | 0.03 | 0.04 |
| P18760 | Cofilin-1 OS=Mus musculus GN=Cfl1 PE=1 SV=3                                                          | 0.00 | 0.00 | 0.02 | 0.00 |
| P19001 | Keratin, type I cytoskeletal 19 OS=Mus musculus GN=Krt19 PE=2 SV=1                                   | 1.00 | 0.06 | 1.00 | 1.00 |
| P19157 | Glutathione S-transferase P 1 OS=Mus musculus GN=Gstp1 PE=1 SV=2                                     | 1.00 | 0.02 | 1.00 | 0.00 |
| P19253 | 60S ribosomal protein L13a OS=Mus musculus GN=Rpl13a PE=1 SV=4                                       | 1.00 | 0.00 | 0.02 | 0.00 |
| P19324 | Serpin H1 OS=Mus musculus GN=Serpinh1 PE=1 SV=3                                                      | 0.00 | 0.00 | 0.00 | 0.00 |
| P20029 | 78 kDa glucose-regulated protein OS=Mus musculus GN=Hspa5 PE=1 SV=3                                  | 0.00 | 0.00 | 0.00 | 0.00 |
| P20065 | Thymosin beta-4 OS=Mus musculus GN=Tmsb4x PE=1 SV=1                                                  | 1.00 | 1.00 | 0.06 | 1.00 |
| P20108 | Thioredoxin-dependent peroxide reductase, mitochondrial OS=Mus musculus GN=Prdx3 PE=1 SV=1           | 1.00 | 1.00 | 0.04 | 1.00 |
| P20152 | Vimentin OS=Mus musculus GN=Vim PE=1 SV=3                                                            | 0.02 | 0.00 | 0.00 | 0.00 |
| P21981 | Protein-glutamine gamma-glutamyltransferase 2 OS=Mus musculus GN=Tgm2 PE=1 SV=4                      | 1.00 | 1.00 | 1.00 | 0.00 |
| P23198 | Chromobox protein homolog 3 OS=Mus musculus GN=Cbx3 PE=1 SV=2                                        | 1.00 | 0.00 | 0.00 | 0.02 |

|        |                                                                                                         |      |      |      |      |
|--------|---------------------------------------------------------------------------------------------------------|------|------|------|------|
| P23492 | Purine nucleoside phosphorylase OS=Mus musculus GN=Pnp PE=1 SV=2                                        | 1.00 | 0.07 | 0.03 | 0.03 |
| P24270 | Catalase OS=Mus musculus GN=Cat PE=1 SV=4                                                               | 1.00 | 0.02 | 1.00 | 1.00 |
| P24369 | Peptidyl-prolyl cis-trans isomerase B OS=Mus musculus GN=Ppip PE=2 SV=2                                 | 0.03 | 0.00 | 0.00 | 0.00 |
| P25206 | DNA replication licensing factor MCM3 OS=Mus musculus GN=Mcm3 PE=1 SV=2                                 | 0.02 | 1.00 | 1.00 | 1.00 |
| P25444 | 40S ribosomal protein S2 OS=Mus musculus GN=Rps2 PE=1 SV=3                                              | 1.00 | 0.02 | 0.00 | 0.00 |
| P26039 | Talin-1 OS=Mus musculus GN=Tln1 PE=1 SV=2                                                               | 1.00 | 0.02 | 0.02 | 0.00 |
| P26040 | Ezrin OS=Mus musculus GN=Ezr PE=1 SV=3                                                                  | 1.00 | 0.02 | 0.02 | 0.00 |
| P26041 | Moesin OS=Mus musculus GN=Msn PE=1 SV=3                                                                 | 0.03 | 0.00 | 0.00 | 0.00 |
| P26043 | Radixin OS=Mus musculus GN=Rdx PE=1 SV=3                                                                | 1.00 | 0.00 | 1.00 | 1.00 |
| P26350 | Prothymosin alpha OS=Mus musculus GN=Ptma PE=1 SV=2                                                     | 0.00 | 0.00 | 0.00 | 0.00 |
| P26443 | Glutamate dehydrogenase 1, mitochondrial OS=Mus musculus GN=Glud1 PE=1 SV=1                             | 1.00 | 1.00 | 0.02 | 1.00 |
| P26638 | Seryl-tRNA synthetase, cytoplasmic OS=Mus musculus GN=Sars PE=2 SV=3                                    | 1.00 | 0.06 | 1.00 | 1.00 |
| P26645 | Myristoylated alanine-rich C-kinase substrate OS=Mus musculus GN=Marcks PE=1 SV=2                       | 0.00 | 0.00 | 0.00 | 0.00 |
| P27546 | Microtubule-associated protein 4 OS=Mus musculus GN=Map4 PE=1 SV=3                                      | 1.00 | 0.02 | 0.00 | 0.00 |
| P27659 | 60S ribosomal protein L3 OS=Mus musculus GN=Rpl3 PE=2 SV=3                                              | 1.00 | 0.03 | 0.02 | 0.00 |
| P27773 | Protein disulfide-isomerase A3 OS=Mus musculus GN=Pdia3 PE=1 SV=2                                       | 0.00 | 0.00 | 0.00 | 0.00 |
| P28352 | DNA-(apurinic or apyrimidinic site) lyase OS=Mus musculus GN=Apex1 PE=1 SV=2                            | 1.00 | 1.00 | 0.02 | 1.00 |
| P28656 | Nucleosome assembly protein 1-like 1 OS=Mus musculus GN=Nap111 PE=1 SV=2                                | 0.04 | 1.00 | 1.00 | 1.00 |
| P28660 | Nck-associated protein 1 OS=Mus musculus GN=Nckap1 PE=2 SV=2                                            | 1.00 | 0.01 | 1.00 | 1.00 |
| P28667 | MARCKS-related protein OS=Mus musculus GN=Marcks1 PE=1 SV=2                                             | 0.00 | 0.00 | 0.02 | 1.00 |
| P28843 | Dipeptidyl peptidase 4 OS=Mus musculus GN=Dpp4 PE=1 SV=3                                                | 1.00 | 1.00 | 1.00 | 0.02 |
| P29341 | Polyadenylate-binding protein 1 OS=Mus musculus GN=Pabpc1 PE=1 SV=2                                     | 0.04 | 1.00 | 0.03 | 1.00 |
| P29758 | Ornithine aminotransferase, mitochondrial OS=Mus musculus GN=Oat PE=1 SV=1                              | 1.00 | 0.04 | 0.00 | 0.00 |
| P30412 | Peptidyl-prolyl cis-trans isomerase C OS=Mus musculus GN=Ppic PE=1 SV=1                                 | 1.00 | 0.05 | 1.00 | 0.02 |
| P30416 | Peptidyl-prolyl cis-trans isomerase FKBP4 OS=Mus musculus GN=Fkbp4 PE=1 SV=5                            | 1.00 | 0.02 | 0.02 | 1.00 |
| P30681 | High mobility group protein B2 OS=Mus musculus GN=Hmgb2 PE=1 SV=3                                       | 0.04 | 0.00 | 0.00 | 0.07 |
| P31001 | Desmin OS=Mus musculus GN=Des PE=1 SV=3                                                                 | 1.00 | 0.02 | 0.00 | 0.00 |
| P31786 | Acyl-CoA-binding protein OS=Mus musculus GN=Dbi PE=1 SV=2                                               | 1.00 | 1.00 | 0.04 | 1.00 |
| P34022 | Ran-specific GTPase-activating protein OS=Mus musculus GN=Ranbp1 PE=1 SV=2                              | 0.00 | 0.02 | 0.04 | 0.03 |
| P34884 | Macrophage migration inhibitory factor OS=Mus musculus GN=Mif PE=1 SV=2                                 | 0.04 | 0.02 | 1.00 | 1.00 |
| P35278 | Ras-related protein Rab-5C OS=Mus musculus GN=Rab5c PE=1 SV=2                                           | 1.00 | 1.00 | 1.00 | 0.00 |
| P35486 | Pyruvate dehydrogenase E1 component subunit alpha, somatic form, mitochondrial OS=Mus musculus GN=PdhE1 | 1.00 | 0.02 | 1.00 | 1.00 |
| P35492 | Histidine ammonia-lyase OS=Mus musculus GN=Hal PE=1 SV=1                                                | 1.00 | 1.00 | 1.00 | 0.04 |
| P35564 | Calnexin OS=Mus musculus GN=Canx PE=1 SV=1                                                              | 1.00 | 0.00 | 1.00 | 0.00 |
| P35700 | Peroxiredoxin-1 OS=Mus musculus GN=Prdx1 PE=1 SV=1                                                      | 0.00 | 0.00 | 0.00 | 0.00 |
| P35979 | 60S ribosomal protein L12 OS=Mus musculus GN=Rpl12 PE=1 SV=2                                            | 1.00 | 0.00 | 0.00 | 0.00 |
| P35980 | 60S ribosomal protein L18 OS=Mus musculus GN=Rpl18 PE=2 SV=3                                            | 1.00 | 0.00 | 0.00 | 0.00 |
| P37804 | Transgelin OS=Mus musculus GN=Tagln PE=1 SV=3                                                           | 1.00 | 0.02 | 0.00 | 0.00 |
| P38060 | Hydroxymethylglutaryl-CoA lyase, mitochondrial OS=Mus musculus GN=Hmgcl PE=1 SV=2                       | 1.00 | 1.00 | 0.08 | 1.00 |
| P40124 | Adenylyl cyclase-associated protein 1 OS=Mus musculus GN=Cap1 PE=1 SV=4                                 | 1.00 | 0.06 | 0.02 | 0.02 |
| P40142 | Transketolase OS=Mus musculus GN=Tkt PE=1 SV=1                                                          | 0.02 | 0.00 | 0.00 | 0.00 |
| P42208 | Septin-2 OS=Mus musculus GN=Sept2 PE=1 SV=2                                                             | 1.00 | 0.05 | 1.00 | 0.00 |
| P42932 | T-complex protein 1 subunit theta OS=Mus musculus GN=Cct8 PE=1 SV=3                                     | 1.00 | 0.02 | 1.00 | 0.05 |
| P43137 | Lithostathine-1 OS=Mus musculus GN=Reg1 PE=2 SV=1                                                       | 1.00 | 1.00 | 0.00 | 0.00 |
| P43274 | Histone H1.4 OS=Mus musculus GN=Hist1h1e PE=1 SV=2                                                      | 1.00 | 0.00 | 0.02 | 0.00 |
| P43275 | Histone H1.1 OS=Mus musculus GN=Hist1h1a PE=2 SV=2                                                      | 0.00 | 0.00 | 0.00 | 0.00 |
| P43276 | Histone H1.5 OS=Mus musculus GN=Hist1h1b PE=1 SV=2                                                      | 0.00 | 0.00 | 0.00 | 0.00 |
| P43277 | Histone H1.3 OS=Mus musculus GN=Hist1h1d PE=1 SV=2                                                      | 1.00 | 0.05 | 1.00 | 1.00 |
| P45376 | Aldose reductase OS=Mus musculus GN=Akr1b1 PE=1 SV=3                                                    | 1.00 | 1.00 | 1.00 | 0.02 |
| P45591 | Cofilin-2 OS=Mus musculus GN=Cfl2 PE=1 SV=1                                                             | 1.00 | 1.00 | 1.00 | 0.02 |
| P45878 | Peptidyl-prolyl cis-trans isomerase FKBP2 OS=Mus musculus GN=Fkbp2 PE=1 SV=1                            | 1.00 | 0.02 | 1.00 | 1.00 |
| P47738 | Aldehyde dehydrogenase, mitochondrial OS=Mus musculus GN=Aldh2 PE=1 SV=1                                | 1.00 | 0.00 | 0.00 | 0.00 |
| P47740 | Fatty aldehyde dehydrogenase OS=Mus musculus GN=Aldh3a2 PE=2 SV=2                                       | 1.00 | 1.00 | 1.00 | 0.02 |
| P47753 | F-actin-capping protein subunit alpha-1 OS=Mus musculus GN=Capza1 PE=1 SV=4                             | 1.00 | 0.02 | 0.02 | 0.02 |
| P47757 | F-actin-capping protein subunit beta OS=Mus musculus GN=Capzb PE=1 SV=3                                 | 1.00 | 0.03 | 0.03 | 0.02 |
| P47878 | Insulin-like growth factor-binding protein 3 OS=Mus musculus GN=Igfbp3 PE=2 SV=1                        | 1.00 | 0.03 | 1.00 | 1.00 |
| P47911 | 60S ribosomal protein L6 OS=Mus musculus GN=Rpl6 PE=1 SV=3                                              | 1.00 | 1.00 | 0.02 | 0.00 |
| P47915 | 60S ribosomal protein L29 OS=Mus musculus GN=Rpl29 PE=2 SV=2                                            | 1.00 | 0.02 | 1.00 | 1.00 |
| P47955 | 60S acidic ribosomal protein P1 OS=Mus musculus GN=Rplp1 PE=1 SV=1                                      | 1.00 | 0.02 | 1.00 | 0.02 |
| P47962 | 60S ribosomal protein L5 OS=Mus musculus GN=Rpl5 PE=1 SV=3                                              | 0.03 | 0.00 | 0.00 | 0.08 |
| P47963 | 60S ribosomal protein L13 OS=Mus musculus GN=Rpl13 PE=2 SV=3                                            | 1.00 | 0.00 | 0.00 | 0.04 |
| P47964 | 60S ribosomal protein L36 OS=Mus musculus GN=Rpl36 PE=2 SV=2                                            | 1.00 | 0.00 | 0.04 | 1.00 |
| P48036 | Annexin A5 OS=Mus musculus GN=Anxa5 PE=1 SV=1                                                           | 0.02 | 0.00 | 0.00 | 0.00 |
| P48678 | Prelamin-A/C OS=Mus musculus GN=Lmna PE=1 SV=2                                                          | 0.00 | 0.00 | 0.00 | 0.00 |
| P48754 | Breast cancer type 1 susceptibility protein homolog OS=Mus musculus GN=Brca1 PE=1 SV=2                  | 1.00 | 0.04 | 1.00 | 1.00 |
| P48758 | Carbonyl reductase [NADPH] 1 OS=Mus musculus GN=Cbr1 PE=1 SV=3                                          | 1.00 | 0.02 | 1.00 | 1.00 |
| P48771 | Cytochrome c oxidase subunit 7A2, mitochondrial OS=Mus musculus GN=Cox7a2 PE=1 SV=2                     | 1.00 | 0.02 | 1.00 | 1.00 |
| P49183 | Deoxyribonuclease-1 OS=Mus musculus GN=Dnase1 PE=2 SV=2                                                 | 0.02 | 0.02 | 1.00 | 1.00 |
| P49312 | Heterogeneous nuclear ribonucleoprotein A1 OS=Mus musculus GN=Hnmpa1 PE=1 SV=2                          | 0.00 | 0.00 | 0.00 | 0.00 |
| P49722 | Proteasome subunit alpha type-2 OS=Mus musculus GN=Pasma2 PE=1 SV=2                                     | 1.00 | 0.08 | 1.00 | 1.00 |
| P49817 | Caveolin-1 OS=Mus musculus GN=Cav1 PE=1 SV=1                                                            | 1.00 | 1.00 | 0.05 | 0.00 |

|        |                                                                                                         |      |      |      |      |
|--------|---------------------------------------------------------------------------------------------------------|------|------|------|------|
| P49919 | Cyclin-dependent kinase inhibitor 1C OS=Mus musculus GN=Cdkn1c PE=2 SV=1                                | 1.00 | 0.02 | 1.00 | 1.00 |
| P50247 | Adenosylhomocysteinase OS=Mus musculus GN=Ahcy PE=1 SV=3                                                | 0.05 | 0.00 | 0.00 | 0.00 |
| P50543 | Protein S100-A11 OS=Mus musculus GN=S100a11 PE=2 SV=1                                                   | 1.00 | 0.02 | 1.00 | 0.02 |
| P50580 | Proliferation-associated protein 2G4 OS=Mus musculus GN=Pa2g4 PE=1 SV=3                                 | 0.00 | 0.00 | 0.00 | 1.00 |
| P51150 | Ras-related protein Rab-7a OS=Mus musculus GN=Rab7a PE=1 SV=2                                           | 1.00 | 0.07 | 0.02 | 0.00 |
| P51174 | Long-chain specific acyl-CoA dehydrogenase, mitochondrial OS=Mus musculus GN=Acadl PE=2 SV=2            | 1.00 | 1.00 | 0.02 | 0.02 |
| P51410 | 60S ribosomal protein L9 OS=Mus musculus GN=Rpl9 PE=2 SV=2                                              | 1.00 | 1.00 | 1.00 | 0.00 |
| P51660 | Peroxisomal multifunctional enzyme type 2 OS=Mus musculus GN=Hsd17b4 PE=1 SV=3                          | 1.00 | 1.00 | 0.03 | 1.00 |
| P51859 | Hepatoma-derived growth factor OS=Mus musculus GN=Hdgf PE=1 SV=2                                        | 1.00 | 0.00 | 0.02 | 0.04 |
| P52480 | Pyruvate kinase isozymes M1/M2 OS=Mus musculus GN=Pkm2 PE=1 SV=4                                        | 0.00 | 0.00 | 0.00 | 0.00 |
| P52793 | Ephrin-A1 OS=Mus musculus GN=Efna1 PE=2 SV=1                                                            | 1.00 | 0.07 | 1.00 | 1.00 |
| P52927 | High mobility group protein HMGI-C OS=Mus musculus GN=Hmga2 PE=1 SV=1                                   | 0.02 | 0.05 | 1.00 | 1.00 |
| P53026 | 60S ribosomal protein L10a OS=Mus musculus GN=Rpl10a PE=1 SV=3                                          | 1.00 | 0.03 | 0.02 | 0.05 |
| P54071 | Isocitrate dehydrogenase [NADP], mitochondrial OS=Mus musculus GN=Idh2 PE=1 SV=3                        | 1.00 | 0.00 | 0.00 | 0.00 |
| P54227 | Stathmin OS=Mus musculus GN=Stmn1 PE=1 SV=2                                                             | 0.05 | 0.00 | 1.00 | 1.00 |
| P56395 | Cytochrome b5 OS=Mus musculus GN=Cyb5a PE=1 SV=2                                                        | 1.00 | 1.00 | 1.00 | 0.02 |
| P56480 | ATP synthase subunit beta, mitochondrial OS=Mus musculus GN=Atp5b PE=1 SV=2                             | 0.00 | 0.00 | 0.00 | 0.00 |
| P56501 | Mitochondrial uncoupling protein 3 OS=Mus musculus GN=Ucp3 PE=2 SV=1                                    | 0.05 | 0.03 | 1.00 | 0.08 |
| P56959 | RNA-binding protein FUS OS=Mus musculus GN=Fus PE=2 SV=1                                                | 0.02 | 0.00 | 0.00 | 0.00 |
| P57759 | Endoplasmic reticulum resident protein 29 OS=Mus musculus GN=Erp29 PE=1 SV=2                            | 1.00 | 0.05 | 1.00 | 1.00 |
| P57776 | Elongation factor 1-delta OS=Mus musculus GN=Eef1d PE=1 SV=3                                            | 1.00 | 0.02 | 0.02 | 0.00 |
| P57780 | Alpha-actinin-4 OS=Mus musculus GN=Actn4 PE=1 SV=1                                                      | 1.00 | 0.05 | 0.02 | 0.00 |
| P58252 | Elongation factor 2 OS=Mus musculus GN=Eef2 PE=1 SV=2                                                   | 0.02 | 0.00 | 0.00 | 0.00 |
| P58771 | Tropomyosin alpha-1 chain OS=Mus musculus GN=Tpm1 PE=1 SV=1                                             | 0.02 | 0.00 | 0.00 | 0.00 |
| P58871 | 182 kDa tankyrase-1-binding protein OS=Mus musculus GN=Tnks1bp1 PE=1 SV=2                               | 1.00 | 1.00 | 1.00 | 0.06 |
| P59158 | Solute carrier family 12 member 3 OS=Mus musculus GN=Slc12a3 PE=2 SV=1                                  | 1.00 | 0.04 | 1.00 | 1.00 |
| P60122 | RuvB-like 1 OS=Mus musculus GN=Ruvbl1 PE=1 SV=1                                                         | 1.00 | 1.00 | 0.02 | 1.00 |
| P60335 | Poly(rC)-binding protein 1 OS=Mus musculus GN=Pcbp1 PE=1 SV=1                                           | 1.00 | 0.02 | 0.02 | 0.02 |
| P60766 | Cell division control protein 42 homolog OS=Mus musculus GN=Cdc42 PE=1 SV=2                             | 1.00 | 0.00 | 0.02 | 1.00 |
| P60824 | Cold-inducible RNA-binding protein OS=Mus musculus GN=Cirbp PE=1 SV=1                                   | 1.00 | 1.00 | 1.00 | 0.05 |
| P60843 | Eukaryotic initiation factor 4A-1 OS=Mus musculus GN=Eif4a1 PE=2 SV=1                                   | 0.03 | 0.00 | 0.02 | 0.00 |
| P60867 | 40S ribosomal protein S20 OS=Mus musculus GN=Rps20 PE=1 SV=1                                            | 0.05 | 0.00 | 0.00 | 0.00 |
| P61089 | Ubiquitin-conjugating enzyme E2 N OS=Mus musculus GN=Ube2n PE=1 SV=1                                    | 0.02 | 0.00 | 0.02 | 0.00 |
| P61168 | D(2) dopamine receptor OS=Mus musculus GN=Drd2 PE=2 SV=2                                                | 0.04 | 0.03 | 1.00 | 1.00 |
| P61255 | 60S ribosomal protein L26 OS=Mus musculus GN=Rpl26 PE=2 SV=1                                            | 0.00 | 0.00 | 0.05 | 1.00 |
| P61358 | 60S ribosomal protein L27 OS=Mus musculus GN=Rpl27 PE=2 SV=2                                            | 1.00 | 0.04 | 0.02 | 0.02 |
| P61750 | ADP-ribosylation factor 4 OS=Mus musculus GN=Arf4 PE=2 SV=2                                             | 0.02 | 0.02 | 0.02 | 0.02 |
| P61804 | Dolichyl-diphosphooligosaccharide--protein glycosyltransferase subunit DAD1 OS=Mus musculus GN=Dad1 PE= | 1.00 | 0.03 | 1.00 | 0.00 |
| P61957 | Small ubiquitin-related modifier 2 OS=Mus musculus GN=Sumo2 PE=2 SV=1                                   | 1.00 | 0.02 | 0.00 | 1.00 |
| P61979 | Heterogeneous nuclear ribonucleoprotein K OS=Mus musculus GN=Hnrnpk PE=1 SV=1                           | 0.00 | 0.00 | 0.00 | 0.00 |
| P61982 | 14-3-3 protein gamma OS=Mus musculus GN=Ywhag PE=1 SV=2                                                 | 1.00 | 0.02 | 0.00 | 0.00 |
| P62071 | Ras-related protein R-Ras2 OS=Mus musculus GN=Rras2 PE=1 SV=1                                           | 1.00 | 1.00 | 1.00 | 0.02 |
| P62082 | 40S ribosomal protein S7 OS=Mus musculus GN=Rps7 PE=2 SV=1                                              | 1.00 | 0.00 | 1.00 | 0.00 |
| P62137 | Serine/threonine-protein phosphatase PP1-alpha catalytic subunit OS=Mus musculus GN=Ppp1ca PE=1 SV=1    | 1.00 | 0.02 | 1.00 | 1.00 |
| P62141 | Serine/threonine-protein phosphatase PP1-beta catalytic subunit OS=Mus musculus GN=Ppp1cb PE=1 SV=3     | 1.00 | 0.02 | 1.00 | 1.00 |
| P62204 | Calmodulin OS=Mus musculus GN=Calm1 PE=1 SV=2                                                           | 1.00 | 0.00 | 0.02 | 0.00 |
| P62242 | 40S ribosomal protein S8 OS=Mus musculus GN=Rps8 PE=1 SV=2                                              | 0.02 | 0.00 | 0.00 | 0.00 |
| P62245 | 40S ribosomal protein S15a OS=Mus musculus GN=Rps15a PE=2 SV=2                                          | 1.00 | 0.02 | 0.03 | 0.00 |
| P62259 | 14-3-3 protein epsilon OS=Mus musculus GN=Ywhae PE=1 SV=1                                               | 0.00 | 0.00 | 0.00 | 0.00 |
| P62264 | 40S ribosomal protein S14 OS=Mus musculus GN=Rps14 PE=2 SV=3                                            | 0.02 | 0.00 | 0.00 | 0.02 |
| P62270 | 40S ribosomal protein S18 OS=Mus musculus GN=Rps18 PE=2 SV=3                                            | 0.00 | 0.00 | 0.00 | 0.07 |
| P62281 | 40S ribosomal protein S11 OS=Mus musculus GN=Rps11 PE=2 SV=3                                            | 1.00 | 1.00 | 0.07 | 1.00 |
| P62301 | 40S ribosomal protein S13 OS=Mus musculus GN=Rps13 PE=1 SV=2                                            | 1.00 | 0.05 | 1.00 | 1.00 |
| P62305 | Small nuclear ribonucleoprotein E OS=Mus musculus GN=Snrpe PE=2 SV=1                                    | 1.00 | 0.00 | 1.00 | 0.02 |
| P62307 | Small nuclear ribonucleoprotein F OS=Mus musculus GN=Snrpf PE=2 SV=1                                    | 1.00 | 0.00 | 0.02 | 1.00 |
| P62309 | Small nuclear ribonucleoprotein G OS=Mus musculus GN=Snrgp PE=1 SV=1                                    | 0.03 | 1.00 | 1.00 | 1.00 |
| P62315 | Small nuclear ribonucleoprotein Sm D1 OS=Mus musculus GN=Snrdp1 PE=2 SV=1                               | 1.00 | 0.02 | 1.00 | 0.02 |
| P62317 | Small nuclear ribonucleoprotein Sm D2 OS=Mus musculus GN=Snrdp2 PE=2 SV=1                               | 1.00 | 0.02 | 0.00 | 1.00 |
| P62320 | Small nuclear ribonucleoprotein Sm D3 OS=Mus musculus GN=Snrdp3 PE=1 SV=1                               | 1.00 | 0.02 | 1.00 | 1.00 |
| P62492 | Ras-related protein Rab-11A OS=Mus musculus GN=Rab11a PE=1 SV=3                                         | 1.00 | 0.00 | 0.00 | 0.00 |
| P62500 | TSC22 domain family protein 1 OS=Mus musculus GN=Tsc22d1 PE=2 SV=2                                      | 1.00 | 0.02 | 0.02 | 1.00 |
| P62702 | 40S ribosomal protein S4, X isoform OS=Mus musculus GN=Rps4x PE=2 SV=2                                  | 0.02 | 0.00 | 0.04 | 0.00 |
| P62717 | 60S ribosomal protein L18a OS=Mus musculus GN=Rpl18a PE=1 SV=1                                          | 1.00 | 1.00 | 0.02 | 1.00 |
| P62751 | 60S ribosomal protein L23a OS=Mus musculus GN=Rpl23a PE=1 SV=1                                          | 0.02 | 0.00 | 0.00 | 0.00 |
| P62754 | 40S ribosomal protein S6 OS=Mus musculus GN=Rps6 PE=1 SV=1                                              | 1.00 | 0.00 | 1.00 | 1.00 |
| P62806 | Histone H4 OS=Mus musculus GN=Hist1h4a PE=1 SV=2                                                        | 0.00 | 0.00 | 0.00 | 0.00 |
| P62821 | Ras-related protein Rab-1A OS=Mus musculus GN=Rab1A PE=1 SV=3                                           | 1.00 | 1.00 | 1.00 | 0.02 |
| P62827 | GTP-binding nuclear protein Ran OS=Mus musculus GN=Ran PE=1 SV=3                                        | 0.00 | 0.00 | 0.00 | 0.00 |
| P62830 | 60S ribosomal protein L23 OS=Mus musculus GN=Rpl23 PE=1 SV=1                                            | 1.00 | 1.00 | 1.00 | 0.00 |
| P62843 | 40S ribosomal protein S15 OS=Mus musculus GN=Rps15 PE=2 SV=2                                            | 1.00 | 0.02 | 0.02 | 0.05 |
| P62849 | 40S ribosomal protein S24 OS=Mus musculus GN=Rps24 PE=1 SV=1                                            | 0.08 | 1.00 | 1.00 | 0.02 |

|        |                                                                                                    |      |      |      |      |
|--------|----------------------------------------------------------------------------------------------------|------|------|------|------|
| P62852 | 40S ribosomal protein S25 OS=Mus musculus GN=Rps25 PE=2 SV=1                                       | 1.00 | 0.00 | 0.02 | 0.00 |
| P62855 | 40S ribosomal protein S26 OS=Mus musculus GN=Rps26 PE=2 SV=3                                       | 1.00 | 0.00 | 0.02 | 0.02 |
| P62858 | 40S ribosomal protein S28 OS=Mus musculus GN=Rps28 PE=2 SV=1                                       | 1.00 | 0.00 | 0.02 | 0.02 |
| P62869 | Transcription elongation factor B polypeptide 2 OS=Mus musculus GN=Tceb2 PE=1 SV=1                 | 1.00 | 0.02 | 1.00 | 1.00 |
| P62880 | Guanine nucleotide-binding protein G(I)/G(S)/G(T) subunit beta-2 OS=Mus musculus GN=Gnb2 PE=1 SV=3 | 1.00 | 0.05 | 1.00 | 0.02 |
| P62889 | 60S ribosomal protein L30 OS=Mus musculus GN=Rpl30 PE=2 SV=2                                       | 1.00 | 0.05 | 1.00 | 0.00 |
| P62900 | 60S ribosomal protein L31 OS=Mus musculus GN=Rpl31 PE=2 SV=1                                       | 0.07 | 0.02 | 0.02 | 0.03 |
| P62908 | 40S ribosomal protein S3 OS=Mus musculus GN=Rps3 PE=1 SV=1                                         | 0.02 | 0.05 | 0.02 | 0.00 |
| P62911 | 60S ribosomal protein L32 OS=Mus musculus GN=Rpl32 PE=2 SV=2                                       | 1.00 | 1.00 | 0.02 | 0.02 |
| P62918 | 60S ribosomal protein L8 OS=Mus musculus GN=Rpl8 PE=2 SV=2                                         | 0.00 | 0.00 | 0.00 | 0.00 |
| P62960 | Nuclease-sensitive element-binding protein 1 OS=Mus musculus GN=Ybx1 PE=1 SV=3                     | 1.00 | 0.00 | 0.02 | 0.00 |
| P62962 | Profilin-1 OS=Mus musculus GN=Pfn1 PE=1 SV=2                                                       | 0.08 | 0.00 | 0.03 | 0.00 |
| P62965 | Cellular retinoic acid-binding protein 1 OS=Mus musculus GN=Crabp1 PE=1 SV=2                       | 1.00 | 0.08 | 1.00 | 1.00 |
| P62984 | Ubiquitin-60S ribosomal protein L40 OS=Mus musculus GN=Uba52 PE=1 SV=2                             | 0.00 | 0.00 | 0.00 | 0.00 |
| P62996 | Transformer-2 protein homolog beta OS=Mus musculus GN=Tra2b PE=1 SV=1                              | 1.00 | 1.00 | 1.00 | 0.02 |
| P63005 | Platelet-activating factor acetylhydrolase IB subunit alpha OS=Mus musculus GN=Pafah1b1 PE=1 SV=2  | 1.00 | 1.00 | 0.02 | 1.00 |
| P63017 | Heat shock cognate 71 kDa protein OS=Mus musculus GN=Hspa8 PE=1 SV=1                               | 0.00 | 0.00 | 0.00 | 0.00 |
| P63028 | Translationally-controlled tumor protein OS=Mus musculus GN=Tpt1 PE=1 SV=1                         | 1.00 | 1.00 | 1.00 | 0.02 |
| P63038 | 60 kDa heat shock protein, mitochondrial OS=Mus musculus GN=Hspd1 PE=1 SV=1                        | 0.00 | 0.00 | 0.00 | 0.00 |
| P63085 | Mitogen-activated protein kinase 1 OS=Mus musculus GN=Mapk1 PE=1 SV=3                              | 1.00 | 0.02 | 1.00 | 0.02 |
| P63101 | 14-3-3 protein zeta/delta OS=Mus musculus GN=Ywhaz PE=1 SV=1                                       | 0.00 | 0.00 | 0.00 | 0.00 |
| P63158 | High mobility group protein B1 OS=Mus musculus GN=Hmgb1 PE=1 SV=2                                  | 0.00 | 0.00 | 0.00 | 0.00 |
| P63163 | Small nuclear ribonucleoprotein-associated protein N OS=Mus musculus GN=Snrpn PE=2 SV=1            | 0.05 | 1.00 | 1.00 | 1.00 |
| P63242 | Eukaryotic translation initiation factor 5A-1 OS=Mus musculus GN=Elf5a PE=1 SV=2                   | 0.02 | 0.00 | 0.04 | 0.00 |
| P63254 | Cysteine-rich protein 1 OS=Mus musculus GN=Crip1 PE=2 SV=2                                         | 1.00 | 0.02 | 0.02 | 0.02 |
| P63260 | Actin, cytoplasmic 2 OS=Mus musculus GN=Actg1 PE=1 SV=1                                            | 0.00 | 0.00 | 0.00 | 0.00 |
| P63276 | 40S ribosomal protein S17 OS=Mus musculus GN=Rps17 PE=1 SV=2                                       | 1.00 | 0.02 | 1.00 | 0.02 |
| P63323 | 40S ribosomal protein S12 OS=Mus musculus GN=Rps12 PE=1 SV=2                                       | 1.00 | 0.02 | 0.02 | 0.03 |
| P63325 | 40S ribosomal protein S10 OS=Mus musculus GN=Rps10 PE=1 SV=1                                       | 0.02 | 0.07 | 0.02 | 1.00 |
| P67778 | Prohibitin OS=Mus musculus GN=Phb PE=1 SV=1                                                        | 1.00 | 1.00 | 0.02 | 1.00 |
| P67871 | Casein kinase II subunit beta OS=Mus musculus GN=Csnk2b PE=1 SV=1                                  | 1.00 | 1.00 | 0.06 | 1.00 |
| P67984 | 60S ribosomal protein L22 OS=Mus musculus GN=Rpl22 PE=2 SV=2                                       | 1.00 | 0.00 | 0.00 | 0.00 |
| P68037 | Ubiquitin-conjugating enzyme E2 L3 OS=Mus musculus GN=Ube2l3 PE=2 SV=1                             | 1.00 | 0.04 | 0.06 | 1.00 |
| P68040 | Guanine nucleotide-binding protein subunit beta-2-like 1 OS=Mus musculus GN=Gnb2l1 PE=1 SV=3       | 1.00 | 1.00 | 0.02 | 0.05 |
| P68134 | Actin, alpha skeletal muscle OS=Mus musculus GN=Acta1 PE=1 SV=1                                    | 0.00 | 0.00 | 0.00 | 0.00 |
| P68254 | 14-3-3 protein theta OS=Mus musculus GN=Ywhaq PE=1 SV=1                                            | 0.00 | 0.00 | 0.02 | 0.00 |
| P68369 | Tubulin alpha-1A chain OS=Mus musculus GN=Tuba1a PE=1 SV=1                                         | 0.07 | 0.00 | 0.02 | 0.00 |
| P68372 | Tubulin beta-2C chain OS=Mus musculus GN=Tubb2c PE=1 SV=1                                          | 1.00 | 1.00 | 1.00 | 0.00 |
| P68433 | Histone H3.1 OS=Mus musculus GN=Hist1h3a PE=1 SV=2                                                 | 0.00 | 0.00 | 0.03 | 0.02 |
| P68510 | 14-3-3 protein eta OS=Mus musculus GN=Ywhah PE=1 SV=2                                              | 0.03 | 0.00 | 0.00 | 0.00 |
| P70121 | Zinc fingers and homeoboxes protein 1 OS=Mus musculus GN=Zhx1 PE=1 SV=2                            | 1.00 | 0.07 | 1.00 | 1.00 |
| P70168 | Importin subunit beta-1 OS=Mus musculus GN=Kpnb1 PE=1 SV=2                                         | 1.00 | 1.00 | 0.04 | 0.00 |
| P70195 | Proteasome subunit beta type-7 OS=Mus musculus GN=Psb7 PE=1 SV=1                                   | 1.00 | 0.00 | 0.03 | 1.00 |
| P70296 | Phosphatidylethanolamine-binding protein 1 OS=Mus musculus GN=Pebp1 PE=1 SV=3                      | 1.00 | 0.04 | 1.00 | 0.00 |
| P70333 | Heterogeneous nuclear ribonucleoprotein H2 OS=Mus musculus GN=Hnrnp2 PE=1 SV=1                     | 1.00 | 0.00 | 0.02 | 0.00 |
| P70349 | Histidine triad nucleotide-binding protein 1 OS=Mus musculus GN=Hint1 PE=1 SV=3                    | 1.00 | 1.00 | 0.02 | 0.02 |
| P70372 | ELAV-like protein 1 OS=Mus musculus GN=Elavl1 PE=1 SV=2                                            | 1.00 | 0.02 | 0.02 | 1.00 |
| P70441 | Na(+)/H(+) exchange regulatory cofactor NHE-RF1 OS=Mus musculus GN=Slc9a3r1 PE=1 SV=3              | 1.00 | 1.00 | 0.02 | 0.00 |
| P80313 | T-complex protein 1 subunit eta OS=Mus musculus GN=Cct7 PE=1 SV=1                                  | 1.00 | 1.00 | 0.02 | 1.00 |
| P80315 | T-complex protein 1 subunit delta OS=Mus musculus GN=Cct4 PE=1 SV=3                                | 1.00 | 0.06 | 1.00 | 0.04 |
| P80316 | T-complex protein 1 subunit epsilon OS=Mus musculus GN=Cct5 PE=1 SV=1                              | 1.00 | 1.00 | 1.00 | 0.02 |
| P83917 | Chromobox protein homolog 1 OS=Mus musculus GN=Cbx1 PE=1 SV=1                                      | 1.00 | 0.02 | 0.04 | 0.02 |
| P84078 | ADP-ribosylation factor 1 OS=Mus musculus GN=Arf1 PE=1 SV=2                                        | 1.00 | 0.00 | 0.04 | 0.00 |
| P84099 | 60S ribosomal protein L19 OS=Mus musculus GN=Rpl19 PE=1 SV=1                                       | 0.02 | 0.02 | 0.02 | 0.00 |
| P84104 | Serine/arginine-rich splicing factor 3 OS=Mus musculus GN=Srsf3 PE=2 SV=1                          | 0.02 | 0.02 | 1.00 | 0.02 |
| P84228 | Histone H3.2 OS=Mus musculus GN=Hist1h3b PE=1 SV=2                                                 | 0.02 | 0.02 | 1.00 | 0.02 |
| P84244 | Histone H3.3 OS=Mus musculus GN=H3f3a PE=1 SV=2                                                    | 0.02 | 0.02 | 1.00 | 0.02 |
| P97300 | Neuroplastin OS=Mus musculus GN=Nptn PE=1 SV=3                                                     | 1.00 | 1.00 | 0.07 | 0.08 |
| P97310 | DNA replication licensing factor MCM2 OS=Mus musculus GN=Mcm2 PE=1 SV=3                            | 1.00 | 1.00 | 0.02 | 1.00 |
| P97315 | Cysteine and glycine-rich protein 1 OS=Mus musculus GN=Csrp1 PE=1 SV=3                             | 1.00 | 1.00 | 0.05 | 1.00 |
| P97350 | Plakophilin-1 OS=Mus musculus GN=Pkp1 PE=1 SV=1                                                    | 1.00 | 1.00 | 1.00 | 0.02 |
| P97351 | 40S ribosomal protein S3a OS=Mus musculus GN=Rps3a PE=1 SV=3                                       | 1.00 | 0.00 | 0.00 | 0.02 |
| P97352 | Protein S100-A13 OS=Mus musculus GN=S100a13 PE=1 SV=1                                              | 1.00 | 1.00 | 0.02 | 0.02 |
| P97371 | Proteasome activator complex subunit 1 OS=Mus musculus GN=Psmc1 PE=2 SV=2                          | 0.03 | 1.00 | 0.02 | 0.02 |
| P97372 | Proteasome activator complex subunit 2 OS=Mus musculus GN=Psmc2 PE=2 SV=4                          | 1.00 | 1.00 | 1.00 | 0.05 |
| P97429 | Annexin A4 OS=Mus musculus GN=Anxa4 PE=2 SV=4                                                      | 1.00 | 0.04 | 0.00 | 0.00 |
| P97447 | Four and a half LIM domains protein 1 OS=Mus musculus GN=Fhl1 PE=2 SV=3                            | 1.00 | 1.00 | 0.02 | 0.02 |
| P97449 | Aminopeptidase N OS=Mus musculus GN=Anpep PE=1 SV=4                                                | 1.00 | 1.00 | 0.03 | 0.00 |
| P97450 | ATP synthase-coupling factor 6, mitochondrial OS=Mus musculus GN=Atp5j PE=1 SV=1                   | 1.00 | 0.04 | 1.00 | 1.00 |
| P97497 | Sex hormone-binding globulin OS=Mus musculus GN=Shbg PE=2 SV=1                                     | 1.00 | 0.07 | 1.00 | 1.00 |
| P97807 | Fumarate hydratase, mitochondrial OS=Mus musculus GN=Fh PE=1 SV=3                                  | 1.00 | 0.02 | 1.00 | 0.00 |

|        |                                                                                                       |      |      |      |      |
|--------|-------------------------------------------------------------------------------------------------------|------|------|------|------|
| P97855 | Ras GTPase-activating protein-binding protein 1 OS=Mus musculus GN=G3bp1 PE=1 SV=1                    | 1.00 | 1.00 | 1.00 | 0.00 |
| P99024 | Tubulin beta-5 chain OS=Mus musculus GN=Tubb5 PE=1 SV=1                                               | 1.00 | 0.02 | 0.00 | 0.00 |
| P99026 | Proteasome subunit beta type-4 OS=Mus musculus GN=Psb4 PE=1 SV=1                                      | 1.00 | 0.00 | 1.00 | 1.00 |
| P99027 | 60S acidic ribosomal protein P2 OS=Mus musculus GN=Rplp2 PE=1 SV=3                                    | 0.00 | 0.00 | 0.02 | 0.00 |
| P99029 | Peroxisomal protein OS=Mus musculus GN=Prdx5 PE=1 SV=2                                                | 1.00 | 0.02 | 1.00 | 0.00 |
| Q00519 | Xanthine dehydrogenase/oxidase OS=Mus musculus GN=Xdh PE=1 SV=5                                       | 1.00 | 1.00 | 1.00 | 0.02 |
| Q00915 | Retinol-binding protein 1 OS=Mus musculus GN=Rbp1 PE=2 SV=2                                           | 1.00 | 0.02 | 0.02 | 0.00 |
| Q00P19 | Heterogeneous nuclear ribonucleoprotein U-like protein 2 OS=Mus musculus GN=Hnrnpul2 PE=1 SV=1        | 1.00 | 1.00 | 0.02 | 1.00 |
| Q01730 | Ras suppressor protein 1 OS=Mus musculus GN=Rsu1 PE=2 SV=3                                            | 1.00 | 1.00 | 1.00 | 0.02 |
| Q01768 | Nucleoside diphosphate kinase B OS=Mus musculus GN=Nme2 PE=1 SV=1                                     | 0.02 | 0.00 | 0.00 | 0.00 |
| Q01853 | Transitional endoplasmic reticulum ATPase OS=Mus musculus GN=Vcp PE=1 SV=4                            | 0.03 | 0.00 | 1.00 | 0.00 |
| Q02053 | Ubiquitin-like modifier-activating enzyme 1 OS=Mus musculus GN=Uba1 PE=1 SV=1                         | 0.08 | 0.00 | 0.00 | 0.00 |
| Q02257 | Junction plakoglobin OS=Mus musculus GN=Jup PE=1 SV=3                                                 | 1.00 | 1.00 | 1.00 | 0.00 |
| Q03265 | ATP synthase subunit alpha, mitochondrial OS=Mus musculus GN=Atp5a1 PE=1 SV=1                         | 0.07 | 0.00 | 0.02 | 0.00 |
| Q04447 | Creatine kinase B-type OS=Mus musculus GN=Ckb PE=1 SV=1                                               | 1.00 | 1.00 | 1.00 | 0.00 |
| Q04857 | Collagen alpha-1(VI) chain OS=Mus musculus GN=Col6a1 PE=2 SV=1                                        | 1.00 | 1.00 | 0.02 | 0.04 |
| Q05144 | Ras-related C3 botulinum toxin substrate 2 OS=Mus musculus GN=Rac2 PE=2 SV=1                          | 1.00 | 1.00 | 0.02 | 0.02 |
| Q05186 | Reticulocalbin-1 OS=Mus musculus GN=Rcn1 PE=1 SV=1                                                    | 0.02 | 0.00 | 0.02 | 0.00 |
| Q05816 | Fatty acid-binding protein, epidermal OS=Mus musculus GN=Fabp5 PE=1 SV=3                              | 0.02 | 0.00 | 0.00 | 0.00 |
| Q06185 | ATP synthase subunit e, mitochondrial OS=Mus musculus GN=Atp5i PE=1 SV=2                              | 1.00 | 0.02 | 0.02 | 1.00 |
| Q07113 | Cation-independent mannose-6-phosphate receptor OS=Mus musculus GN=Igf2r PE=1 SV=1                    | 0.02 | 0.00 | 0.00 | 1.00 |
| Q07475 | Neuronal protein 3.1 OS=Mus musculus GN=P311 PE=2 SV=1                                                | 1.00 | 1.00 | 0.05 | 1.00 |
| Q08189 | Protein-glutamine gamma-glutamyltransferase E OS=Mus musculus GN=Tgm3 PE=1 SV=2                       | 1.00 | 1.00 | 1.00 | 0.03 |
| Q09163 | Protein delta homolog 1 OS=Mus musculus GN=Dk1 PE=1 SV=1                                              | 1.00 | 0.04 | 1.00 | 1.00 |
| Q0VBK2 | Keratin, type II cytoskeletal 80 OS=Mus musculus GN=Krt80 PE=2 SV=1                                   | 1.00 | 1.00 | 1.00 | 0.00 |
| Q2VIS4 | Filaggrin-2 OS=Mus musculus GN=Flg2 PE=1 SV=2                                                         | 1.00 | 1.00 | 1.00 | 0.02 |
| Q3TEA8 | Heterochromatin protein 1-binding protein 3 OS=Mus musculus GN=Hp1bp3 PE=1 SV=1                       | 1.00 | 1.00 | 1.00 | 0.04 |
| Q3THE2 | Myosin regulatory light chain 12B OS=Mus musculus GN=Myl12b PE=1 SV=2                                 | 1.00 | 0.00 | 0.00 | 0.00 |
| Q3THW5 | Histone H2A.V OS=Mus musculus GN=H2afv PE=1 SV=3                                                      | 0.02 | 0.05 | 1.00 | 0.00 |
| Q3TJ91 | Lethal(2) giant larvae protein homolog 2 OS=Mus musculus GN=Llg2 PE=2 SV=2                            | 1.00 | 0.04 | 1.00 | 1.00 |
| Q3TML0 | Uncharacterized protein OS=Mus musculus GN=Pdia6 PE=2 SV=1                                            | 0.02 | 0.00 | 0.00 | 0.00 |
| Q3TWW8 | Splicing factor, arginine/serine-rich 6 OS=Mus musculus GN=Srsf6 PE=2 SV=1                            | 1.00 | 0.02 | 0.02 | 1.00 |
| Q3TYA6 | RIKEN cDNA 4930548G07 OS=Mus musculus GN=Mphosph8 PE=2 SV=1                                           | 0.04 | 1.00 | 1.00 | 1.00 |
| Q3U0V1 | Far upstream element-binding protein 2 OS=Mus musculus GN=Khsrp PE=1 SV=2                             | 1.00 | 0.00 | 0.00 | 0.03 |
| Q3U1J4 | DNA damage-binding protein 1 OS=Mus musculus GN=Ddb1 PE=1 SV=2                                        | 1.00 | 1.00 | 0.08 | 1.00 |
| Q3U7R1 | Extended synaptotagmin-1 OS=Mus musculus GN=Esy1 PE=2 SV=2                                            | 1.00 | 1.00 | 1.00 | 0.03 |
| Q3UHD9 | Arf-GAP with GTPase, ANK repeat and PH domain-containing protein 2 OS=Mus musculus GN=Agap2 PE=1 SV=1 | 1.00 | 0.04 | 1.00 | 1.00 |
| Q3UHX2 | 28 kDa heat- and acid-stable phosphoprotein OS=Mus musculus GN=Pdap1 PE=1 SV=1                        | 1.00 | 1.00 | 1.00 | 0.05 |
| Q3UJB0 | Splicing factor 3b, subunit 2 OS=Mus musculus GN=Sf3b2 PE=2 SV=1                                      | 0.04 | 1.00 | 1.00 | 1.00 |
| Q3USB7 | Inactive phospholipase C-like protein 1 OS=Mus musculus GN=Plcl1 PE=1 SV=3                            | 1.00 | 0.06 | 1.00 | 1.00 |
| Q3UW53 | Protein Niban OS=Mus musculus GN=Fam129a PE=1 SV=2                                                    | 1.00 | 1.00 | 1.00 | 0.00 |
| Q3V0P4 | Gene model 1661 OS=Mus musculus GN=Gm1661 PE=2 SV=1                                                   | 1.00 | 1.00 | 0.08 | 1.00 |
| Q3V0Q1 | Dynein heavy chain 12, axonemal OS=Mus musculus GN=Dnah12 PE=1 SV=2                                   | 1.00 | 1.00 | 1.00 | 0.05 |
| Q3V1T4 | Prolyl 3-hydroxylase 1 OS=Mus musculus GN=Lepre1 PE=2 SV=2                                            | 1.00 | 1.00 | 1.00 | 0.02 |
| Q4KL66 | Pregnancy-specific glycoprotein 28 OS=Mus musculus GN=Psg28 PE=2 SV=1                                 | 0.01 | 1.00 | 1.00 | 1.00 |
| Q4U4S6 | Xin actin-binding repeat-containing protein 2 OS=Mus musculus GN=Xirp2 PE=1 SV=1                      | 1.00 | 1.00 | 1.00 | 0.07 |
| Q4V9X0 | Ppp3ca protein OS=Mus musculus GN=Ppp3ca PE=2 SV=1                                                    | 1.00 | 0.07 | 1.00 | 1.00 |
| Q501J6 | Probable ATP-dependent RNA helicase DDX17 OS=Mus musculus GN=Ddx17 PE=2 SV=1                          | 0.02 | 0.02 | 1.00 | 0.00 |
| Q504N0 | Carboxypeptidase A2 OS=Mus musculus GN=Cpa2 PE=2 SV=1                                                 | 1.00 | 0.00 | 0.03 | 1.00 |
| Q52KH6 | Novel protein OS=Mus musculus GN=DXBay18 PE=2 SV=1                                                    | 1.00 | 1.00 | 1.00 | 0.03 |
| Q58E70 | Tpm3 protein OS=Mus musculus GN=Tpm3 PE=2 SV=1                                                        | 1.00 | 0.00 | 0.00 | 0.00 |
| Q5BKQ4 | Pancreatic lipase-related protein 1 OS=Mus musculus GN=Pnlipr1 PE=2 SV=2                              | 0.02 | 0.00 | 0.00 | 0.00 |
| Q5DTT4 | Retrotransposon gag domain-containing protein 4 OS=Mus musculus GN=Rgag4 PE=2 SV=2                    | 1.00 | 0.01 | 1.00 | 1.00 |
| Q5F4T0 | Transient receptor potential cation channel, subfamily M, member 3 OS=Mus musculus GN=Trpm3 PE=2 SV=1 | 1.00 | 0.02 | 1.00 | 1.00 |
| Q5XJY5 | Coatomer subunit delta OS=Mus musculus GN=Arcn1 PE=2 SV=2                                             | 1.00 | 1.00 | 1.00 | 0.02 |
| Q60605 | Myosin light polypeptide 6 OS=Mus musculus GN=Myl6 PE=1 SV=3                                          | 1.00 | 0.02 | 0.00 | 0.00 |
| Q60662 | A-kinase anchor protein 4 OS=Mus musculus GN=Akap4 PE=1 SV=1                                          | 0.06 | 0.02 | 1.00 | 0.04 |
| Q60668 | Heterogeneous nuclear ribonucleoprotein D0 OS=Mus musculus GN=Hnrnpd PE=1 SV=2                        | 1.00 | 0.00 | 0.02 | 0.00 |
| Q60692 | Proteasome subunit beta type-6 OS=Mus musculus GN=Psb6 PE=1 SV=3                                      | 1.00 | 0.00 | 0.02 | 0.02 |
| Q60715 | Prolyl 4-hydroxylase subunit alpha-1 OS=Mus musculus GN=P4ha1 PE=2 SV=2                               | 1.00 | 1.00 | 1.00 | 0.00 |
| Q60716 | Prolyl 4-hydroxylase subunit alpha-2 OS=Mus musculus GN=P4ha2 PE=2 SV=1                               | 1.00 | 0.02 | 0.02 | 1.00 |
| Q60739 | BAG family molecular chaperone regulator 1 OS=Mus musculus GN=Bag1 PE=1 SV=3                          | 1.00 | 0.07 | 0.02 | 0.03 |
| Q60751 | Insulin-like growth factor 1 receptor OS=Mus musculus GN=Igf1r PE=1 SV=3                              | 1.00 | 0.01 | 1.00 | 1.00 |
| Q60817 | Nascent polypeptide-associated complex subunit alpha OS=Mus musculus GN=Naca PE=1 SV=1                | 1.00 | 0.00 | 1.00 | 0.02 |
| Q60854 | Serpin B6 OS=Mus musculus GN=Serpnb6 PE=2 SV=1                                                        | 1.00 | 1.00 | 1.00 | 0.00 |
| Q60864 | Stress-induced-phosphoprotein 1 OS=Mus musculus GN=Stip1 PE=1 SV=1                                    | 1.00 | 0.02 | 0.04 | 1.00 |
| Q60865 | Caprin-1 OS=Mus musculus GN=Caprin1 PE=1 SV=2                                                         | 1.00 | 1.00 | 1.00 | 0.07 |
| Q60870 | Receptor expression-enhancing protein 5 OS=Mus musculus GN=Reep5 PE=1 SV=1                            | 1.00 | 1.00 | 0.02 | 1.00 |
| Q60931 | Voltage-dependent anion-selective channel protein 3 OS=Mus musculus GN=Vdac3 PE=1 SV=1                | 1.00 | 1.00 | 1.00 | 0.07 |
| Q60932 | Voltage-dependent anion-selective channel protein 1 OS=Mus musculus GN=Vdac1 PE=1 SV=3                | 1.00 | 0.00 | 0.00 | 0.00 |
| Q60997 | Deleted in malignant brain tumors 1 protein OS=Mus musculus GN=Dmbt1 PE=1 SV=2                        | 1.00 | 1.00 | 0.00 | 1.00 |

|        |                                                                                                      |      |      |      |      |
|--------|------------------------------------------------------------------------------------------------------|------|------|------|------|
| Q61029 | Lamina-associated polypeptide 2, isoforms beta/delta/epsilon/gamma OS=Mus musculus GN=Tmpo PE=1 SV=4 | 1.00 | 0.02 | 0.00 | 0.00 |
| Q61035 | Histidyl-tRNA synthetase, cytoplasmic OS=Mus musculus GN=Hars PE=2 SV=2                              | 1.00 | 0.02 | 0.02 | 1.00 |
| Q61171 | Peroxiredoxin-2 OS=Mus musculus GN=Prdx2 PE=1 SV=3                                                   | 0.02 | 0.00 | 0.02 | 0.00 |
| Q61207 | Sulfated glycoprotein 1 OS=Mus musculus GN=Psap PE=1 SV=2                                            | 1.00 | 0.02 | 0.08 | 1.00 |
| Q61409 | cGMP-inhibited 3',5'-cyclic phosphodiesterase B OS=Mus musculus GN=Pde3b PE=1 SV=2                   | 1.00 | 0.02 | 1.00 | 1.00 |
| Q61425 | Hydroxyacyl-coenzyme A dehydrogenase, mitochondrial OS=Mus musculus GN=Hadh PE=1 SV=2                | 1.00 | 0.00 | 1.00 | 1.00 |
| Q61545 | RNA-binding protein EWS OS=Mus musculus GN=Ewsr1 PE=1 SV=2                                           | 1.00 | 0.00 | 1.00 | 1.00 |
| Q61553 | Fascin OS=Mus musculus GN=Fscn1 PE=1 SV=4                                                            | 1.00 | 0.00 | 0.00 | 0.00 |
| Q61598 | Rab GDP dissociation inhibitor beta OS=Mus musculus GN=Gdi2 PE=1 SV=1                                | 1.00 | 1.00 | 1.00 | 0.02 |
| Q61599 | Rho GDP-dissociation inhibitor 2 OS=Mus musculus GN=Arhgdib PE=1 SV=3                                | 1.00 | 1.00 | 1.00 | 0.02 |
| Q61753 | D-3-phosphoglycerate dehydrogenase OS=Mus musculus GN=Phgdh PE=1 SV=3                                | 1.00 | 0.03 | 0.00 | 1.00 |
| Q61792 | LIM and SH3 domain protein 1 OS=Mus musculus GN=Lasp1 PE=1 SV=1                                      | 1.00 | 1.00 | 1.00 | 0.02 |
| Q61879 | Myosin-10 OS=Mus musculus GN=Myh10 PE=1 SV=2                                                         | 1.00 | 1.00 | 1.00 | 0.02 |
| Q61937 | Nucleophosmin OS=Mus musculus GN=Npm1 PE=1 SV=1                                                      | 0.00 | 0.00 | 0.00 | 0.00 |
| Q61990 | Poly(rC)-binding protein 2 OS=Mus musculus GN=Pcbp2 PE=1 SV=1                                        | 1.00 | 1.00 | 1.00 | 0.00 |
| Q62048 | Astrocytic phosphoprotein PEA-15 OS=Mus musculus GN=Pea15 PE=1 SV=1                                  | 1.00 | 0.02 | 0.02 | 0.02 |
| Q62093 | Serine/arginine-rich splicing factor 2 OS=Mus musculus GN=Srsf2 PE=1 SV=4                            | 1.00 | 0.02 | 1.00 | 0.02 |
| Q62148 | Retinal dehydrogenase 2 OS=Mus musculus GN=Aldh1a2 PE=1 SV=2                                         | 1.00 | 0.03 | 1.00 | 0.02 |
| Q62167 | ATP-dependent RNA helicase DDX3X OS=Mus musculus GN=Ddx3x PE=1 SV=3                                  | 0.08 | 1.00 | 0.05 | 1.00 |
| Q62188 | Dihydropyrimidinase-related protein 3 OS=Mus musculus GN=Dpysl3 PE=1 SV=1                            | 1.00 | 0.03 | 0.02 | 0.00 |
| Q62189 | U1 small nuclear ribonucleoprotein A OS=Mus musculus GN=Snrpa PE=2 SV=3                              | 1.00 | 0.02 | 0.03 | 1.00 |
| Q62261 | Spectrin beta chain, brain 1 OS=Mus musculus GN=Sptbn1 PE=1 SV=2                                     | 1.00 | 0.05 | 0.00 | 0.00 |
| Q62318 | Transcription intermediary factor 1-beta OS=Mus musculus GN=Trim28 PE=1 SV=3                         | 1.00 | 0.03 | 1.00 | 1.00 |
| Q62376 | U1 small nuclear ribonucleoprotein 70 kDa OS=Mus musculus GN=Snrnp70 PE=1 SV=2                       | 1.00 | 0.08 | 1.00 | 1.00 |
| Q62446 | Peptidyl-prolyl cis-trans isomerase FKBP3 OS=Mus musculus GN=Fkbp3 PE=1 SV=2                         | 1.00 | 0.02 | 1.00 | 1.00 |
| Q62465 | Synaptic vesicle membrane protein VAT-1 homolog OS=Mus musculus GN=Vat1 PE=1 SV=3                    | 1.00 | 0.02 | 0.00 | 0.00 |
| Q63836 | Selenium-binding protein 2 OS=Mus musculus GN=Selenbp2 PE=1 SV=2                                     | 1.00 | 0.02 | 0.02 | 0.02 |
| Q63918 | Serum deprivation-response protein OS=Mus musculus GN=Sdpr PE=1 SV=3                                 | 1.00 | 1.00 | 1.00 | 0.03 |
| Q64012 | RNA-binding protein Raly OS=Mus musculus GN=Raly PE=1 SV=3                                           | 0.04 | 1.00 | 0.07 | 1.00 |
| Q640L3 | Cell cycle progression protein 1 OS=Mus musculus GN=Ccpg1 PE=1 SV=2                                  | 1.00 | 0.04 | 1.00 | 1.00 |
| Q64285 | Bile salt-activated lipase OS=Mus musculus GN=Cel PE=1 SV=1                                          | 1.00 | 0.00 | 0.02 | 0.00 |
| Q64314 | Hematopoietic progenitor cell antigen CD34 OS=Mus musculus GN=Cd34 PE=1 SV=1                         | 1.00 | 0.07 | 1.00 | 1.00 |
| Q64433 | 10 kDa heat shock protein, mitochondrial OS=Mus musculus GN=Hspe1 PE=1 SV=2                          | 0.02 | 0.00 | 0.00 | 0.00 |
| Q64522 | Histone H2A type 2-B OS=Mus musculus GN=Hist2h2ab PE=1 SV=3                                          | 0.00 | 0.00 | 1.00 | 0.00 |
| Q64727 | Vinculin OS=Mus musculus GN=Vcl PE=1 SV=4                                                            | 1.00 | 0.02 | 0.00 | 0.00 |
| Q68FD5 | Clathrin heavy chain 1 OS=Mus musculus GN=Cltc PE=1 SV=3                                             | 1.00 | 1.00 | 1.00 | 0.00 |
| Q6A0C2 | MKIAA0136 protein (Fragment) OS=Mus musculus GN=Morc3 PE=2 SV=1                                      | 1.00 | 0.05 | 1.00 | 1.00 |
| Q6B966 | NACHT, LRR and PYD domains-containing protein 14 OS=Mus musculus GN=Nlrp14 PE=2 SV=2                 | 1.00 | 1.00 | 1.00 | 0.03 |
| Q6IE03 | Sentrin/SUMO-specific protease 15 OS=Mus musculus GN=Gm9839 PE=2 SV=1                                | 0.07 | 0.08 | 1.00 | 0.07 |
| Q6IFZ6 | Keratin, type II cytoskeletal 1b OS=Mus musculus GN=Krt77 PE=1 SV=1                                  | 0.08 | 1.00 | 1.00 | 0.00 |
| Q6IRU2 | Tropomyosin alpha-4 chain OS=Mus musculus GN=Tpm4 PE=2 SV=3                                          | 1.00 | 0.00 | 0.00 | 0.00 |
| Q6P069 | Sorcini OS=Mus musculus GN=Sri PE=1 SV=1                                                             | 1.00 | 1.00 | 0.04 | 1.00 |
| Q6P5G0 | Mitogen-activated protein kinase 4 OS=Mus musculus GN=Mapk4 PE=2 SV=1                                | 1.00 | 1.00 | 1.00 | 0.08 |
| Q6P9N8 | Trafficking protein, kinesin binding 2 OS=Mus musculus GN=Trak2 PE=2 SV=1                            | 1.00 | 0.03 | 1.00 | 0.05 |
| Q6PDG5 | SWI/SNF complex subunit SMARCC2 OS=Mus musculus GN=Smarcc2 PE=1 SV=2                                 | 1.00 | 0.08 | 1.00 | 1.00 |
| Q6PDM2 | Serine/arginine-rich splicing factor 1 OS=Mus musculus GN=Srsf1 PE=1 SV=3                            | 0.00 | 0.00 | 0.02 | 1.00 |
| Q6PDN3 | Myosin light chain kinase, smooth muscle OS=Mus musculus GN=Mylk PE=1 SV=3                           | 1.00 | 1.00 | 0.08 | 1.00 |
| Q6PGA0 | REST corepressor 3 OS=Mus musculus GN=Rcor3 PE=2 SV=2                                                | 1.00 | 1.00 | 0.08 | 1.00 |
| Q6PHZ5 | Putative RNA-binding protein 15B OS=Mus musculus GN=Rbm15b PE=1 SV=2                                 | 1.00 | 1.00 | 0.07 | 1.00 |
| Q6PJ18 | Tpm2 protein OS=Mus musculus GN=Tpm2 PE=2 SV=1                                                       | 1.00 | 0.02 | 1.00 | 0.02 |
| Q6WKZ8 | E3 ubiquitin-protein ligase UBR2 OS=Mus musculus GN=Ubr2 PE=1 SV=2                                   | 1.00 | 0.01 | 1.00 | 0.01 |
| Q6VVG3 | BTB/POZ domain-containing protein KCTD12 OS=Mus musculus GN=Kctd12 PE=1 SV=1                         | 1.00 | 0.00 | 0.02 | 0.02 |
| Q6ZPY7 | Lysine-specific demethylase 3B OS=Mus musculus GN=Kdm3b PE=1 SV=2                                    | 0.04 | 0.05 | 1.00 | 1.00 |
| Q6ZWN5 | 40S ribosomal protein S9 OS=Mus musculus GN=Rps9 PE=2 SV=3                                           | 1.00 | 0.02 | 0.02 | 0.03 |
| Q6ZWU9 | 40S ribosomal protein S27 OS=Mus musculus GN=Rps27 PE=1 SV=3                                         | 1.00 | 1.00 | 0.02 | 1.00 |
| Q6ZWV3 | 60S ribosomal protein L10 OS=Mus musculus GN=Rpl10 PE=2 SV=3                                         | 1.00 | 1.00 | 1.00 | 0.00 |
| Q6ZWV7 | 60S ribosomal protein L35 OS=Mus musculus GN=Rpl35 PE=2 SV=1                                         | 0.02 | 0.02 | 0.02 | 0.02 |
| Q6ZWX6 | Eukaryotic translation initiation factor 2 subunit 1 OS=Mus musculus GN=Eif2s1 PE=1 SV=3             | 1.00 | 1.00 | 0.02 | 1.00 |
| Q78PY7 | Staphylococcal nuclease domain-containing protein 1 OS=Mus musculus GN=Snd1 PE=1 SV=1                | 1.00 | 0.00 | 0.00 | 1.00 |
| Q792Y9 | MCG140783 OS=Mus musculus GN=Gm5771 PE=2 SV=1                                                        | 1.00 | 0.02 | 0.02 | 1.00 |
| Q792Z0 | Trypsinogen 11 OS=Mus musculus GN=Prss3 PE=2 SV=1                                                    | 1.00 | 0.00 | 0.00 | 1.00 |
| Q792Z1 | MCG140784 OS=Mus musculus GN=Try10 PE=2 SV=1                                                         | 1.00 | 0.00 | 0.02 | 0.02 |
| Q77MK9 | Heterogeneous nuclear ribonucleoprotein Q OS=Mus musculus GN=Synrcp PE=1 SV=2                        | 1.00 | 0.02 | 0.00 | 0.00 |
| Q7TNC4 | Putative RNA-binding protein Luc7-like 2 OS=Mus musculus GN=Luc7l2 PE=1 SV=1                         | 1.00 | 0.02 | 1.00 | 1.00 |
| Q7TPR4 | Alpha-actinin-1 OS=Mus musculus GN=Actn1 PE=1 SV=1                                                   | 0.03 | 1.00 | 1.00 | 0.00 |
| Q7TPZ8 | Carboxypeptidase A1 OS=Mus musculus GN=Cpa1 PE=2 SV=1                                                | 0.02 | 0.00 | 0.00 | 0.00 |
| Q80TN7 | Neuron navigator 3 OS=Mus musculus GN=Nav3 PE=1 SV=2                                                 | 0.04 | 1.00 | 1.00 | 1.00 |
| Q80VM4 | Zinc finger protein 579 OS=Mus musculus GN=Znf579 PE=1 SV=1                                          | 1.00 | 1.00 | 1.00 | 0.08 |
| Q80WJ7 | Protein LYRIC OS=Mus musculus GN=Mtdh PE=1 SV=1                                                      | 1.00 | 1.00 | 0.05 | 1.00 |
| Q80WT0 | Junctophilin-4 OS=Mus musculus GN=Jph4 PE=2 SV=1                                                     | 1.00 | 0.07 | 0.07 | 1.00 |
| Q80X90 | Filamin-B OS=Mus musculus GN=Finb PE=1 SV=3                                                          | 1.00 | 1.00 | 0.07 | 0.00 |

|        |                                                                                                         |      |      |      |      |
|--------|---------------------------------------------------------------------------------------------------------|------|------|------|------|
| Q80XD0 | BC051142 protein OS=Mus musculus GN=BC051142 PE=2 SV=1                                                  | 1.00 | 0.01 | 1.00 | 1.00 |
| Q80XU3 | Nuclear ubiquitous casein and cyclin-dependent kinases substrate OS=Mus musculus GN=Nucks1 PE=1 SV=1    | 1.00 | 0.02 | 1.00 | 1.00 |
| Q8BFR5 | Elongation factor Tu, mitochondrial OS=Mus musculus GN=Tufm PE=1 SV=1                                   | 1.00 | 1.00 | 0.03 | 1.00 |
| Q8BFS6 | Calcineurin-like phosphoesterase domain-containing protein 1 OS=Mus musculus GN=Cpped1 PE=2 SV=1        | 1.00 | 1.00 | 0.05 | 1.00 |
| Q8BG05 | Heterogeneous nuclear ribonucleoprotein A3 OS=Mus musculus GN=Hnrmpa3 PE=1 SV=1                         | 0.00 | 0.00 | 0.00 | 0.00 |
| Q8BGD9 | Eukaryotic translation initiation factor 4B OS=Mus musculus GN=EIF4B PE=1 SV=1                          | 0.04 | 1.00 | 1.00 | 1.00 |
| Q8BGS0 | Protein MAK16 homolog OS=Mus musculus GN=Mak16 PE=2 SV=1                                                | 1.00 | 1.00 | 1.00 | 0.07 |
| Q8BH64 | EH domain-containing protein 2 OS=Mus musculus GN=Ehd2 PE=1 SV=1                                        | 1.00 | 1.00 | 1.00 | 0.00 |
| Q8BH95 | Enoyl-CoA hydratase, mitochondrial OS=Mus musculus GN=Echs1 PE=1 SV=1                                   | 1.00 | 1.00 | 0.02 | 1.00 |
| Q8BH97 | Reticulocalbin-3 OS=Mus musculus GN=Rcn3 PE=2 SV=1                                                      | 1.00 | 0.00 | 0.02 | 0.00 |
| Q8BHN3 | Neutral alpha-glucosidase AB OS=Mus musculus GN=Ganab PE=1 SV=1                                         | 1.00 | 0.04 | 1.00 | 1.00 |
| Q8BJU0 | Small glutamine-rich tetrapeptide repeat-containing protein alpha OS=Mus musculus GN=Sgta PE=1 SV=2     | 1.00 | 0.07 | 1.00 | 1.00 |
| Q8BK67 | Protein RCC2 OS=Mus musculus GN=Rcc2 PE=2 SV=1                                                          | 1.00 | 0.06 | 1.00 | 1.00 |
| Q8BL97 | Serine/arginine-rich splicing factor 7 OS=Mus musculus GN=Srsf7 PE=1 SV=1                               | 1.00 | 0.00 | 0.03 | 1.00 |
| Q8BМК4 | Cytoskeleton-associated protein 4 OS=Mus musculus GN=Ckap4 PE=2 SV=2                                    | 0.00 | 0.00 | 0.00 | 0.00 |
| Q8BMS1 | Trifunctional enzyme subunit alpha, mitochondrial OS=Mus musculus GN=Hadha PE=1 SV=1                    | 1.00 | 1.00 | 0.00 | 0.00 |
| Q8BP67 | 60S ribosomal protein L24 OS=Mus musculus GN=Rpl24 PE=2 SV=2                                            | 1.00 | 1.00 | 0.07 | 0.02 |
| Q8BP92 | Reticulocalbin-2 OS=Mus musculus GN=Rcn2 PE=2 SV=1                                                      | 1.00 | 1.00 | 1.00 | 0.02 |
| Q8BSY0 | Aspartyl/asparaginyl beta-hydroxylase OS=Mus musculus GN=Asph PE=2 SV=1                                 | 1.00 | 1.00 | 1.00 | 0.02 |
| Q8BTF7 | DNA ligase 4 OS=Mus musculus GN=Lig4 PE=2 SV=1                                                          | 1.00 | 1.00 | 0.07 | 1.00 |
| Q8BTM8 | Filamin-A OS=Mus musculus GN=Flna PE=1 SV=5                                                             | 1.00 | 0.00 | 0.00 | 0.00 |
| Q8BUE4 | Apoptosis-inducing factor 2 OS=Mus musculus GN=Aifm2 PE=2 SV=1                                          | 1.00 | 1.00 | 0.05 | 0.02 |
| Q8BWT1 | 3-ketoacyl-CoA thiolase, mitochondrial OS=Mus musculus GN=Acaa2 PE=1 SV=3                               | 1.00 | 1.00 | 1.00 | 0.00 |
| Q8BX57 | PX domain-containing protein kinase-like protein OS=Mus musculus GN=Pxx PE=1 SV=2                       | 1.00 | 0.08 | 1.00 | 1.00 |
| Q8C0M9 | L-asparaginase OS=Mus musculus GN=Asrgl1 PE=1 SV=1                                                      | 1.00 | 1.00 | 1.00 | 0.04 |
| Q8C138 | Uncharacterized protein C6orf105 homolog OS=Mus musculus PE=2 SV=2                                      | 1.00 | 1.00 | 1.00 | 0.03 |
| Q8C1B7 | Septin-11 OS=Mus musculus GN=Sept11 PE=1 SV=4                                                           | 1.00 | 0.00 | 0.02 | 0.02 |
| Q8C635 | Glycerol kinase-like 1 OS=Mus musculus GN=Gykl1 PE=2 SV=1                                               | 1.00 | 1.00 | 0.07 | 1.00 |
| Q8CCT4 | Transcription elongation factor A protein-like 5 OS=Mus musculus GN=Tcea5 PE=1 SV=1                     | 0.02 | 1.00 | 1.00 | 1.00 |
| Q8CDN6 | Thioredoxin-like protein 1 OS=Mus musculus GN=Txn1f1 PE=1 SV=3                                          | 1.00 | 0.02 | 0.00 | 1.00 |
| Q8CE23 | Orexigenic neuropeptide QRFP OS=Mus musculus GN=Qrfp PE=2 SV=1                                          | 1.00 | 0.08 | 1.00 | 1.00 |
| Q8CGP2 | Histone H2B type 1-P OS=Mus musculus GN=Hist1h2bp PE=1 SV=3                                             | 0.00 | 0.00 | 0.00 | 0.00 |
| Q8CIE6 | Coatamer subunit alpha OS=Mus musculus GN=Copa PE=1 SV=2                                                | 1.00 | 1.00 | 1.00 | 0.02 |
| Q8K0E8 | Fibrinogen beta chain OS=Mus musculus GN=Fgb PE=2 SV=1                                                  | 1.00 | 1.00 | 1.00 | 0.02 |
| Q8K0Z5 | Tropomyosin 3, gamma OS=Mus musculus GN=Tpm3 PE=2 SV=1                                                  | 1.00 | 0.03 | 0.05 | 0.08 |
| Q8K2B3 | Succinate dehydrogenase [ubiquinone] flavoprotein subunit, mitochondrial OS=Mus musculus GN=Sdha PE=1 S | 0.03 | 0.02 | 0.02 | 0.03 |
| Q8K3P1 | P2X purinoceptor OS=Mus musculus GN=P2rx2 PE=2 SV=2                                                     | 0.05 | 0.08 | 1.00 | 1.00 |
| Q8K4L4 | Protein POF1B OS=Mus musculus GN=Pof1b PE=1 SV=3                                                        | 1.00 | 1.00 | 0.02 | 1.00 |
| Q8K4Z0 | Leucine-rich repeat LGI family member 2 OS=Mus musculus GN=Lgi2 PE=2 SV=1                               | 1.00 | 1.00 | 1.00 | 0.01 |
| Q8QZT1 | Acetyl-CoA acetyltransferase, mitochondrial OS=Mus musculus GN=Acat1 PE=1 SV=1                          | 1.00 | 0.00 | 1.00 | 0.00 |
| Q8R050 | Eukaryotic peptide chain release factor GTP-binding subunit ERF3A OS=Mus musculus GN=Gspst1 PE=1 SV=1   | 1.00 | 0.07 | 1.00 | 1.00 |
| Q8R081 | Heterogeneous nuclear ribonucleoprotein L OS=Mus musculus GN=Hnrpl PE=1 SV=2                            | 1.00 | 0.00 | 1.00 | 1.00 |
| Q8R1M2 | Histone H2A.J OS=Mus musculus GN=H2afj PE=2 SV=1                                                        | 0.02 | 0.02 | 1.00 | 0.02 |
| Q8R207 | Small subunit of serine palmitoyltransferase A OS=Mus musculus GN=Ssspta PE=2 SV=2                      | 1.00 | 0.02 | 0.02 | 0.02 |
| Q8R370 | Usher syndrome type-1C protein-binding protein 1 OS=Mus musculus GN=Ushbp1 PE=1 SV=2                    | 1.00 | 1.00 | 0.03 | 1.00 |
| Q8R5C5 | Beta-centractin OS=Mus musculus GN=Actr1b PE=1 SV=1                                                     | 1.00 | 0.02 | 0.03 | 1.00 |
| Q8VCQ6 | Phosphatidylcholine:ceramide cholinephosphotransferase 1 OS=Mus musculus GN=Sgms1 PE=1 SV=2             | 0.02 | 1.00 | 1.00 | 1.00 |
| Q8VCQ8 | Caldesmon 1 OS=Mus musculus GN=Cald1 PE=2 SV=1                                                          | 1.00 | 0.00 | 0.02 | 0.00 |
| Q8VDD5 | Myosin-9 OS=Mus musculus GN=Myh9 PE=1 SV=4                                                              | 1.00 | 1.00 | 0.00 | 0.00 |
| Q8VDN2 | Sodium/potassium-transporting ATPase subunit alpha-1 OS=Mus musculus GN=Atp1a1 PE=1 SV=1                | 1.00 | 1.00 | 1.00 | 0.02 |
| Q8VDP4 | Protein KIAA1967 homolog OS=Mus musculus PE=1 SV=2                                                      | 1.00 | 1.00 | 1.00 | 0.02 |
| Q8VE97 | Serine/arginine-rich splicing factor 4 OS=Mus musculus GN=Srsf4 PE=2 SV=1                               | 0.07 | 0.03 | 0.02 | 0.02 |
| Q8VEK3 | Heterogeneous nuclear ribonucleoprotein U OS=Mus musculus GN=Hnrmpu PE=1 SV=1                           | 0.03 | 0.00 | 0.00 | 0.00 |
| Q8VF84 | MCG60141 OS=Mus musculus GN=Olfr1317 PE=3 SV=1                                                          | 1.00 | 1.00 | 0.08 | 1.00 |
| Q8VfZ5 | MCG141584 OS=Mus musculus GN=Olfr516 PE=3 SV=1                                                          | 1.00 | 0.04 | 1.00 | 1.00 |
| Q8VHM5 | Heterogeneous nuclear ribonucleoprotein R OS=Mus musculus GN=Hnrpr PE=2 SV=1                            | 1.00 | 0.00 | 0.05 | 0.00 |
| Q8VIJ6 | Splicing factor, proline- and glutamine-rich OS=Mus musculus GN=Sfpq PE=1 SV=1                          | 0.02 | 0.00 | 0.00 | 0.02 |
| Q91V14 | Solute carrier family 12 member 5 OS=Mus musculus GN=Slc12a5 PE=1 SV=2                                  | 1.00 | 0.01 | 1.00 | 1.00 |
| Q91V41 | Ras-related protein Rab-14 OS=Mus musculus GN=Rab14 PE=1 SV=3                                           | 1.00 | 0.02 | 1.00 | 1.00 |
| Q91V55 | Ribosomal protein S5 OS=Mus musculus GN=Rps5 PE=2 SV=1                                                  | 1.00 | 1.00 | 1.00 | 0.02 |
| Q91V64 | Isochorismatase domain-containing protein 1 OS=Mus musculus GN=Isoc1 PE=2 SV=1                          | 1.00 | 1.00 | 1.00 | 0.02 |
| Q91VB8 | Alpha globin 1 OS=Mus musculus GN=Hba-a1 PE=2 SV=1                                                      | 0.02 | 0.02 | 0.00 | 0.00 |
| Q91V17 | Ribonuclease inhibitor OS=Mus musculus GN=Rnh1 PE=1 SV=1                                                | 1.00 | 1.00 | 0.00 | 0.02 |
| Q91VM5 | Heterogeneous nuclear ribonucleoprotein G-like 1 OS=Mus musculus GN=Rbmxl1 PE=2 SV=1                    | 1.00 | 0.08 | 0.02 | 0.00 |
| Q91VM9 | Inorganic pyrophosphatase 2, mitochondrial OS=Mus musculus GN=Ppa2 PE=2 SV=1                            | 1.00 | 1.00 | 0.08 | 1.00 |
| Q91W90 | Thioredoxin domain-containing protein 5 OS=Mus musculus GN=Txndc5 PE=1 SV=2                             | 1.00 | 0.00 | 0.02 | 0.00 |
| Q91WJ8 | Far upstream element-binding protein 1 OS=Mus musculus GN=Fubp1 PE=1 SV=1                               | 1.00 | 0.03 | 1.00 | 0.02 |
| Q91WQ3 | Tyrosyl-tRNA synthetase, cytoplasmic OS=Mus musculus GN=Yars PE=2 SV=3                                  | 1.00 | 1.00 | 0.05 | 1.00 |
| Q91X79 | Elastase 1, pancreatic OS=Mus musculus GN=Cela1 PE=2 SV=1                                               | 1.00 | 0.00 | 0.02 | 0.00 |
| Q91XV3 | Brain acid soluble protein 1 OS=Mus musculus GN=Basp1 PE=1 SV=3                                         | 0.00 | 0.00 | 0.00 | 0.00 |
| Q91Y47 | Coagulation factor XI OS=Mus musculus GN=F11 PE=2 SV=2                                                  | 1.00 | 0.03 | 1.00 | 1.00 |



|        |                                                                                                            |      |      |      |      |
|--------|------------------------------------------------------------------------------------------------------------|------|------|------|------|
| Q91YD9 | Neural Wiskott-Aldrich syndrome protein OS=Mus musculus GN=Wasl PE=1 SV=1                                  | 1.00 | 1.00 | 0.05 | 1.00 |
| Q91YQ5 | Dolichyl-diphosphooligosaccharide--protein glycosyltransferase subunit 1 OS=Mus musculus GN=Rpn1 PE=2 SV=1 | 1.00 | 0.04 | 0.03 | 0.00 |
| Q921B4 | Neurotrophin receptor-interacting factor 2 OS=Mus musculus GN=Nrf2 PE=1 SV=1                               | 0.03 | 0.04 | 0.05 | 0.03 |
| Q921F2 | TAR DNA-binding protein 43 OS=Mus musculus GN=Tardbp PE=1 SV=1                                             | 1.00 | 0.02 | 1.00 | 0.02 |
| Q92111 | Serotransferrin OS=Mus musculus GN=Tf PE=1 SV=1                                                            | 1.00 | 0.07 | 1.00 | 1.00 |
| Q922F4 | Tubulin beta-6 chain OS=Mus musculus GN=Tubb6 PE=1 SV=1                                                    | 1.00 | 1.00 | 1.00 | 0.04 |
| Q922I7 | MCG13402, isoform CRA_c OS=Mus musculus GN=Ptpb1 PE=2 SV=1                                                 | 0.02 | 0.00 | 0.00 | 0.02 |
| Q922U2 | Keratin, type II cytoskeletal 5 OS=Mus musculus GN=Krt5 PE=1 SV=1                                          | 0.02 | 0.00 | 0.00 | 0.00 |
| Q923D4 | Splicing factor 3B subunit 5 OS=Mus musculus GN=Sf3b5 PE=2 SV=1                                            | 1.00 | 0.02 | 1.00 | 1.00 |
| Q93092 | Transaldolase OS=Mus musculus GN=Taldo1 PE=1 SV=2                                                          | 1.00 | 0.04 | 1.00 | 0.00 |
| Q99020 | Heterogeneous nuclear ribonucleoprotein A/B OS=Mus musculus GN=Hnmpab PE=1 SV=1                            | 1.00 | 0.00 | 1.00 | 0.00 |
| Q99J77 | N-acetylneuraminic acid synthase (Sialic acid synthase) OS=Mus musculus GN=Nans PE=2 SV=1                  | 1.00 | 1.00 | 1.00 | 0.02 |
| Q99JF8 | PC4 and SFRS1-interacting protein OS=Mus musculus GN=Pspj1 PE=1 SV=1                                       | 1.00 | 1.00 | 0.04 | 1.00 |
| Q99JI6 | Ras-related protein Rap-1b OS=Mus musculus GN=Rap1b PE=2 SV=2                                              | 1.00 | 0.02 | 0.02 | 0.02 |
| Q99JP7 | Gamma-glutamyltransferase 7 OS=Mus musculus GN=Ggt7 PE=1 SV=2                                              | 1.00 | 0.07 | 1.00 | 1.00 |
| Q99JY9 | Actin-related protein 3 OS=Mus musculus GN=Actr3 PE=1 SV=3                                                 | 1.00 | 1.00 | 1.00 | 0.00 |
| Q99K48 | Non-POU domain-containing octamer-binding protein OS=Mus musculus GN=Nono PE=1 SV=3                        | 1.00 | 0.00 | 0.03 | 1.00 |
| Q99KC8 | von Willebrand factor A domain-containing protein 5A OS=Mus musculus GN=Vwa5a PE=1 SV=2                    | 1.00 | 1.00 | 1.00 | 0.02 |
| Q99KF0 | Caspase recruitment domain-containing protein 14 OS=Mus musculus GN=Card14 PE=2 SV=2                       | 1.00 | 1.00 | 0.03 | 1.00 |
| Q99KF1 | Transmembrane emp24 domain-containing protein 9 OS=Mus musculus GN=Tmed9 PE=2 SV=2                         | 1.00 | 0.00 | 0.02 | 0.00 |
| Q99K10 | Aconitate hydratase, mitochondrial OS=Mus musculus GN=Aco2 PE=1 SV=1                                       | 1.00 | 1.00 | 0.02 | 0.04 |
| Q99KJ8 | Dynactin subunit 2 OS=Mus musculus GN=Dctn2 PE=1 SV=3                                                      | 1.00 | 1.00 | 1.00 | 0.02 |
| Q99KV1 | DnaJ homolog subfamily B member 11 OS=Mus musculus GN=Dnajb11 PE=1 SV=1                                    | 1.00 | 1.00 | 1.00 | 0.04 |
| Q99L47 | Hsc70-interacting protein OS=Mus musculus GN=St13 PE=2 SV=1                                                | 1.00 | 1.00 | 1.00 | 0.02 |
| Q99LC5 | Electron transfer flavoprotein subunit alpha, mitochondrial OS=Mus musculus GN=Etfa PE=1 SV=2              | 1.00 | 0.02 | 1.00 | 0.02 |
| Q99LD8 | N(G),N(G)-dimethylarginine dimethylaminohydrolase 2 OS=Mus musculus GN=Ddah2 PE=1 SV=1                     | 1.00 | 1.00 | 0.02 | 1.00 |
| Q99LJ6 | Glutathione peroxidase 7 OS=Mus musculus GN=Gpx7 PE=2 SV=1                                                 | 1.00 | 0.08 | 1.00 | 1.00 |
| Q99LX0 | Protein DJ-1 OS=Mus musculus GN=Park7 PE=1 SV=1                                                            | 1.00 | 1.00 | 0.04 | 0.00 |
| Q99M74 | Keratin, type II cuticular Hb2 OS=Mus musculus GN=Krt82 PE=2 SV=2                                          | 1.00 | 0.03 | 0.06 | 1.00 |
| Q99MD9 | Nuclear autoantigenic sperm protein OS=Mus musculus GN=Nasp PE=1 SV=2                                      | 1.00 | 0.00 | 0.03 | 1.00 |
| Q99MR6 | Serrate RNA effector molecule homolog OS=Mus musculus GN=Srrt PE=1 SV=1                                    | 0.06 | 1.00 | 1.00 | 1.00 |
| Q99P72 | Reticulon-4 OS=Mus musculus GN=Rtn4 PE=1 SV=2                                                              | 1.00 | 0.02 | 1.00 | 0.00 |
| Q99PL5 | Ribosome-binding protein 1 OS=Mus musculus GN=Rrbp1 PE=2 SV=2                                              | 1.00 | 0.00 | 0.00 | 0.00 |
| Q99PS0 | Keratin, type I cytoskeletal 23 OS=Mus musculus GN=Krt23 PE=2 SV=1                                         | 1.00 | 1.00 | 1.00 | 0.02 |
| Q99PT1 | Rho GDP-dissociation inhibitor 1 OS=Mus musculus GN=Arhgdia PE=1 SV=3                                      | 0.03 | 0.00 | 1.00 | 0.00 |
| Q9CPN9 | RIKEN cDNA 2210010C04, isoform CRA_b OS=Mus musculus GN=2210010C04Rik PE=2 SV=1                            | 1.00 | 0.06 | 0.03 | 0.00 |
| Q9CPQ1 | Cytochrome c oxidase subunit 6C OS=Mus musculus GN=Cox6c PE=1 SV=3                                         | 0.04 | 0.02 | 1.00 | 1.00 |
| Q9CPQ5 | Centromere protein Q OS=Mus musculus GN=Cenpq PE=2 SV=1                                                    | 1.00 | 1.00 | 1.00 | 0.04 |
| Q9CPR4 | 60S ribosomal protein L17 OS=Mus musculus GN=Rpl17 PE=2 SV=3                                               | 1.00 | 0.02 | 0.00 | 0.00 |
| Q9CPV4 | Glyoxalase domain-containing protein 4 OS=Mus musculus GN=Glod4 PE=2 SV=1                                  | 1.00 | 1.00 | 0.08 | 1.00 |
| Q9CPW4 | Actin-related protein 2/3 complex subunit 5 OS=Mus musculus GN=Arpc5 PE=2 SV=3                             | 1.00 | 1.00 | 0.02 | 1.00 |
| Q9CQ52 | Elastase 3, pancreatic OS=Mus musculus GN=Cela3b PE=2 SV=1                                                 | 1.00 | 0.00 | 0.00 | 0.00 |
| Q9CQ65 | S-methyl-5'-thioadenosine phosphorylase OS=Mus musculus GN=Mtap PE=2 SV=1                                  | 1.00 | 1.00 | 0.02 | 1.00 |
| Q9CQC2 | Colipase OS=Mus musculus GN=Clips PE=2 SV=1                                                                | 1.00 | 0.00 | 1.00 | 1.00 |
| Q9CQF9 | Prenylcysteine oxidase OS=Mus musculus GN=Pcyox1 PE=1 SV=1                                                 | 1.00 | 1.00 | 1.00 | 0.02 |
| Q9CQI6 | Coactosin-like protein OS=Mus musculus GN=Cott1 PE=1 SV=3                                                  | 1.00 | 0.07 | 1.00 | 1.00 |
| Q9CQI7 | ATP synthase subunit b, mitochondrial OS=Mus musculus GN=Atp5f1 PE=1 SV=1                                  | 1.00 | 1.00 | 0.05 | 1.00 |
| Q9CQR2 | 40S ribosomal protein S21 OS=Mus musculus GN=Rps21 PE=2 SV=1                                               | 1.00 | 0.00 | 0.00 | 0.00 |
| Q9CQV8 | 14-3-3 protein beta/alpha OS=Mus musculus GN=Ywhab PE=1 SV=3                                               | 0.02 | 0.00 | 0.00 | 0.00 |
| Q9CR35 | Chymotrypsinogen B OS=Mus musculus GN=Ctrb1 PE=2 SV=1                                                      | 0.00 | 0.00 | 0.00 | 0.00 |
| Q9CR57 | 60S ribosomal protein L14 OS=Mus musculus GN=Rpl14 PE=2 SV=3                                               | 1.00 | 0.00 | 0.00 | 0.00 |
| Q9CRB6 | Tubulin polymerization-promoting protein family member 3 OS=Mus musculus GN=Tppp3 PE=1 SV=1                | 1.00 | 0.02 | 0.00 | 0.00 |
| Q9CS72 | Filamin-A-interacting protein 1 OS=Mus musculus GN=Filip1 PE=1 SV=2                                        | 0.07 | 0.08 | 1.00 | 1.00 |
| Q9CWF2 | Tubulin beta-2B chain OS=Mus musculus GN=Tubb2b PE=1 SV=1                                                  | 1.00 | 0.00 | 0.02 | 0.00 |
| Q9CWZ3 | RNA-binding protein 8A OS=Mus musculus GN=Rbm8a PE=1 SV=3                                                  | 1.00 | 0.02 | 1.00 | 1.00 |
| Q9CX80 | Cytoglobin OS=Mus musculus GN=Cygb PE=2 SV=1                                                               | 1.00 | 1.00 | 1.00 | 0.02 |
| Q9CX86 | Uncharacterized protein OS=Mus musculus GN=Hnmpa0 PE=2 SV=1                                                | 1.00 | 1.00 | 1.00 | 0.02 |
| Q9CXW4 | 60S ribosomal protein L11 OS=Mus musculus GN=Rpl11 PE=1 SV=4                                               | 1.00 | 0.04 | 1.00 | 0.02 |
| Q9CY50 | Translocon-associated protein subunit alpha OS=Mus musculus GN=Ssr1 PE=1 SV=1                              | 0.06 | 0.00 | 0.02 | 0.00 |
| Q9CY58 | Plasminogen activator inhibitor 1 RNA-binding protein OS=Mus musculus GN=Serbp1 PE=1 SV=2                  | 0.07 | 0.00 | 1.00 | 0.00 |
| Q9CYZ2 | Tumor protein D54 OS=Mus musculus GN=Tpd52l2 PE=1 SV=1                                                     | 1.00 | 1.00 | 0.02 | 0.04 |
| Q9CZ13 | Cytochrome b-c1 complex subunit 1, mitochondrial OS=Mus musculus GN=Uqcrc1 PE=1 SV=2                       | 1.00 | 1.00 | 0.02 | 1.00 |
| Q9CZ69 | CKLF-like MARVEL transmembrane domain-containing protein 6 OS=Mus musculus GN=Cmtm6 PE=2 SV=1              | 1.00 | 1.00 | 1.00 | 0.04 |
| Q9CZM2 | 60S ribosomal protein L15 OS=Mus musculus GN=Rpl15 PE=2 SV=4                                               | 1.00 | 1.00 | 0.07 | 1.00 |
| Q9CZN7 | Serine hydroxymethyltransferase OS=Mus musculus GN=Shtmt2 PE=2 SV=1                                        | 1.00 | 0.06 | 1.00 | 1.00 |
| Q9CZX8 | 40S ribosomal protein S19 OS=Mus musculus GN=Rps19 PE=1 SV=3                                               | 0.00 | 0.00 | 0.02 | 0.00 |
| Q9D051 | Pyruvate dehydrogenase E1 component subunit beta, mitochondrial OS=Mus musculus GN=Pdhb PE=1 SV=1          | 1.00 | 1.00 | 0.06 | 1.00 |
| Q9D0E1 | Heterogeneous nuclear ribonucleoprotein M OS=Mus musculus GN=Hnmpm PE=1 SV=3                               | 1.00 | 0.08 | 0.02 | 0.07 |
| Q9D0F9 | Phosphoglucomutase-1 OS=Mus musculus GN=Pgm1 PE=1 SV=4                                                     | 1.00 | 0.08 | 0.02 | 1.00 |
| Q9D0J8 | Parathyrosin OS=Mus musculus GN=Ptms PE=2 SV=3                                                             | 0.02 | 0.02 | 0.02 | 0.02 |
| Q9D0K2 | Succinyl-CoA:3-ketoacid-coenzyme A transferase 1, mitochondrial OS=Mus musculus GN=Oxct1 PE=1 SV=1         | 1.00 | 0.02 | 1.00 | 1.00 |

|        |                                                                                                            |      |      |      |      |
|--------|------------------------------------------------------------------------------------------------------------|------|------|------|------|
| Q9D0T1 | NHP2-like protein 1 OS=Mus musculus GN=Nhp2l1 PE=2 SV=4                                                    | 1.00 | 1.00 | 0.04 | 1.00 |
| Q9D1D4 | Transmembrane emp24 domain-containing protein 10 OS=Mus musculus GN=Tmed10 PE=2 SV=1                       | 1.00 | 0.00 | 1.00 | 0.00 |
| Q9D1D6 | Collagen triple helix repeat-containing protein 1 OS=Mus musculus GN=Cthrc1 PE=2 SV=1                      | 1.00 | 0.05 | 1.00 | 1.00 |
| Q9D1J3 | SAP domain-containing ribonucleoprotein OS=Mus musculus GN=Sarnp PE=1 SV=3                                 | 1.00 | 0.03 | 0.02 | 1.00 |
| Q9D1M0 | Protein SEC13 homolog OS=Mus musculus GN=Sec13 PE=2 SV=3                                                   | 1.00 | 1.00 | 0.02 | 1.00 |
| Q9D1R9 | 60S ribosomal protein L34 OS=Mus musculus GN=Rpl34 PE=3 SV=2                                               | 1.00 | 0.02 | 0.02 | 0.06 |
| Q9D281 | Protein Noxp20 OS=Mus musculus GN=Fam114a1 PE=2 SV=1                                                       | 1.00 | 1.00 | 1.00 | 0.02 |
| Q9D2M8 | Ubiquitin-conjugating enzyme E2 variant 2 OS=Mus musculus GN=Ube2v2 PE=2 SV=4                              | 1.00 | 0.02 | 0.02 | 0.04 |
| Q9D358 | Low molecular weight phosphotyrosine protein phosphatase OS=Mus musculus GN=Acp1 PE=2 SV=3                 | 1.00 | 0.04 | 1.00 | 1.00 |
| Q9D3D9 | ATP synthase subunit delta, mitochondrial OS=Mus musculus GN=Atp5d PE=1 SV=1                               | 0.02 | 0.00 | 0.03 | 1.00 |
| Q9D662 | Protein transport protein Sec23B OS=Mus musculus GN=Sec23b PE=2 SV=1                                       | 1.00 | 1.00 | 1.00 | 0.02 |
| Q9D6N5 | Dr1-associated corepressor OS=Mus musculus GN=Drap1 PE=2 SV=3                                              | 1.00 | 0.05 | 1.00 | 1.00 |
| Q9D773 | 39S ribosomal protein L2, mitochondrial OS=Mus musculus GN=Mrlp2 PE=2 SV=1                                 | 1.00 | 1.00 | 0.03 | 0.08 |
| Q9D8B3 | Charged multivesicular body protein 4b OS=Mus musculus GN=Chmp4b PE=2 SV=2                                 | 1.00 | 0.02 | 0.02 | 0.02 |
| Q9D8E6 | 60S ribosomal protein L4 OS=Mus musculus GN=Rpl4 PE=1 SV=3                                                 | 1.00 | 1.00 | 0.02 | 0.02 |
| Q9D8N0 | Elongation factor 1-gamma OS=Mus musculus GN=Eef1g PE=1 SV=3                                               | 1.00 | 0.02 | 0.00 | 0.04 |
| Q9D8U4 | Complement C1q tumor necrosis factor-related protein 2 OS=Mus musculus GN=C1qtnf2 PE=2 SV=1                | 1.00 | 0.02 | 0.03 | 1.00 |
| Q9DAK9 | 14 kDa phosphohistidine phosphatase OS=Mus musculus GN=Phpt1 PE=1 SV=1                                     | 1.00 | 0.04 | 1.00 | 1.00 |
| Q9DAW9 | Calponin-3 OS=Mus musculus GN=Cnn3 PE=2 SV=1                                                               | 1.00 | 0.00 | 1.00 | 1.00 |
| Q9DB77 | Cytochrome b-c1 complex subunit 2, mitochondrial OS=Mus musculus GN=Uqcrc2 PE=1 SV=1                       | 0.04 | 0.02 | 0.02 | 1.00 |
| Q9DBG5 | Perilipin-3 OS=Mus musculus GN=Plin3 PE=1 SV=1                                                             | 1.00 | 1.00 | 0.03 | 1.00 |
| Q9DBG6 | Dolichyl-diphosphooligosaccharide--protein glycosyltransferase subunit 2 OS=Mus musculus GN=Rpn2 PE=2 SV=1 | 0.03 | 1.00 | 1.00 | 0.02 |
| Q9DBJ1 | Phosphoglycerate mutase 1 OS=Mus musculus GN=Pgam1 PE=1 SV=3                                               | 0.00 | 0.00 | 0.00 | 0.00 |
| Q9DBP5 | UMP-CMP kinase OS=Mus musculus GN=Cmpk1 PE=1 SV=1                                                          | 1.00 | 1.00 | 0.05 | 1.00 |
| Q9DBZ1 | Inhibitor of nuclear factor kappa-B kinase-interacting protein OS=Mus musculus GN=Ikkip PE=1 SV=2          | 1.00 | 1.00 | 1.00 | 0.07 |
| Q9DC29 | ATP-binding cassette sub-family B member 6, mitochondrial OS=Mus musculus GN=Abcb6 PE=1 SV=1               | 1.00 | 0.03 | 1.00 | 1.00 |
| Q9DCD0 | 6-phosphogluconate dehydrogenase, decarboxylating OS=Mus musculus GN=Pgd PE=2 SV=3                         | 1.00 | 1.00 | 0.02 | 0.02 |
| Q9DCF9 | Translocon-associated protein subunit gamma OS=Mus musculus GN=Ssr3 PE=1 SV=1                              | 1.00 | 1.00 | 1.00 | 0.02 |
| Q9DCL9 | Multifunctional protein ADE2 OS=Mus musculus GN=Paics PE=1 SV=4                                            | 1.00 | 1.00 | 1.00 | 0.02 |
| Q9DCN2 | NADH-cytochrome b5 reductase 3 OS=Mus musculus GN=Cyb5r3 PE=1 SV=3                                         | 1.00 | 0.04 | 0.00 | 0.00 |
| Q9DCQ2 | Putative L-aspartate dehydrogenase OS=Mus musculus GN=Aspdh PE=1 SV=1                                      | 1.00 | 0.04 | 0.02 | 1.00 |
| Q9DCV7 | Keratin, type II cytoskeletal 7 OS=Mus musculus GN=Krt7 PE=1 SV=1                                          | 1.00 | 1.00 | 1.00 | 0.00 |
| Q9DCW4 | Electron transfer flavoprotein subunit beta OS=Mus musculus GN=Etfb PE=1 SV=3                              | 1.00 | 0.00 | 0.00 | 0.00 |
| Q9DCX2 | ATP synthase subunit d, mitochondrial OS=Mus musculus GN=Atp5h PE=1 SV=3                                   | 1.00 | 1.00 | 0.02 | 1.00 |
| Q9EPC2 | Fibroblast growth factor 23 OS=Mus musculus GN=Fgf23 PE=1 SV=1                                             | 1.00 | 0.03 | 1.00 | 1.00 |
| Q9EQU5 | Protein SET OS=Mus musculus GN=Set PE=1 SV=1                                                               | 0.02 | 0.00 | 0.02 | 0.00 |
| Q9ER05 | Chymopasin OS=Mus musculus GN=Ctr1 PE=2 SV=1                                                               | 1.00 | 0.02 | 0.02 | 0.00 |
| Q9EST1 | Gasdermin-A OS=Mus musculus GN=Gsdma PE=2 SV=1                                                             | 1.00 | 1.00 | 0.06 | 0.00 |
| Q9EST5 | Acidic leucine-rich nuclear phosphoprotein 32 family member B OS=Mus musculus GN=Anp32b PE=1 SV=1          | 1.00 | 0.02 | 0.03 | 1.00 |
| Q9JHJ0 | Tropomodulin-3 OS=Mus musculus GN=Tmod3 PE=1 SV=1                                                          | 1.00 | 1.00 | 1.00 | 0.05 |
| Q9JHU4 | Cytoplasmic dynein 1 heavy chain 1 OS=Mus musculus GN=Dync1h1 PE=1 SV=2                                    | 1.00 | 1.00 | 1.00 | 0.02 |
| Q9JHU9 | Inositol-3-phosphate synthase 1 OS=Mus musculus GN=Isyna1 PE=2 SV=1                                        | 0.07 | 1.00 | 1.00 | 1.00 |
| Q9JI16 | Alcohol dehydrogenase [NADP+] OS=Mus musculus GN=Akr1a1 PE=1 SV=3                                          | 1.00 | 0.00 | 0.04 | 0.07 |
| Q9JIW9 | Ras-related protein Ral-B OS=Mus musculus GN=Ralb PE=2 SV=1                                                | 1.00 | 0.05 | 1.00 | 1.00 |
| Q9JJG7 | Calcium-binding protein 8 OS=Mus musculus GN=Caln1 PE=2 SV=1                                               | 1.00 | 0.02 | 1.00 | 1.00 |
| Q9JJU8 | SH3 domain-binding glutamic acid-rich-like protein OS=Mus musculus GN=Sh3bgl1 PE=2 SV=1                    | 1.00 | 0.02 | 0.02 | 0.02 |
| Q9JJW6 | RNA and export factor-binding protein 2 OS=Mus musculus GN=Refbp2 PE=1 SV=1                                | 1.00 | 0.02 | 0.02 | 0.06 |
| Q9JK81 | UPF0160 protein MYG1, mitochondrial OS=Mus musculus GN=Myg1 PE=2 SV=1                                      | 1.00 | 0.03 | 1.00 | 1.00 |
| Q9JK88 | Serpin I2 OS=Mus musculus GN=Serpini2 PE=1 SV=1                                                            | 1.00 | 0.03 | 1.00 | 1.00 |
| Q9JLJ2 | 4-trimethylaminobutyraldehyde dehydrogenase OS=Mus musculus GN=Aldh9a1 PE=1 SV=1                           | 1.00 | 0.03 | 1.00 | 1.00 |
| Q9JMA4 | Killer cell lectin-like receptor, subfamily A, member 17 OS=Mus musculus GN=Klra17 PE=2 SV=1               | 1.00 | 1.00 | 0.02 | 1.00 |
| Q9JMG7 | Hepatoma-derived growth factor-related protein 3 OS=Mus musculus GN=Hdgrp3 PE=1 SV=2                       | 1.00 | 1.00 | 0.06 | 1.00 |
| Q9QU10 | Transforming protein RhoA OS=Mus musculus GN=Rhoa PE=1 SV=1                                                | 1.00 | 0.04 | 0.00 | 0.02 |
| Q9QUM9 | Proteasome subunit alpha type-6 OS=Mus musculus GN=Psm6 PE=1 SV=1                                          | 1.00 | 1.00 | 0.02 | 0.02 |
| Q9QXL1 | Kinesin-like protein KIF21B OS=Mus musculus GN=Kif21b PE=1 SV=2                                            | 1.00 | 1.00 | 0.08 | 1.00 |
| Q9QXS1 | Plectin OS=Mus musculus GN=Plec PE=1 SV=2                                                                  | 1.00 | 1.00 | 0.04 | 1.00 |
| Q9QXT0 | Protein canopy homolog 2 OS=Mus musculus GN=Cnpy2 PE=2 SV=1                                                | 1.00 | 0.03 | 1.00 | 0.02 |
| Q9QYB1 | Chloride intracellular channel protein 4 OS=Mus musculus GN=Clic4 PE=1 SV=3                                | 1.00 | 1.00 | 1.00 | 0.02 |
| Q9QYB5 | Gamma-adducin OS=Mus musculus GN=Add3 PE=1 SV=2                                                            | 1.00 | 1.00 | 1.00 | 0.00 |
| Q9QYC0 | Alpha-adducin OS=Mus musculus GN=Add1 PE=1 SV=2                                                            | 1.00 | 1.00 | 0.00 | 0.00 |
| Q9QZD9 | Eukaryotic translation initiation factor 3 subunit I OS=Mus musculus GN=Eif3i PE=1 SV=1                    | 1.00 | 0.08 | 1.00 | 1.00 |
| Q9R0N0 | Galactokinase OS=Mus musculus GN=Galk1 PE=2 SV=1                                                           | 1.00 | 0.03 | 1.00 | 1.00 |
| Q9R0P3 | S-formylglutathione hydrolase OS=Mus musculus GN=Esdl PE=2 SV=1                                            | 1.00 | 1.00 | 0.05 | 1.00 |
| Q9R0P5 | Dextrin OS=Mus musculus GN=Dstn PE=1 SV=3                                                                  | 1.00 | 1.00 | 1.00 | 0.00 |
| Q9R0P6 | Signal peptidase complex catalytic subunit SEC11A OS=Mus musculus GN=Sec11a PE=2 SV=1                      | 1.00 | 0.03 | 1.00 | 1.00 |
| Q9R0Q3 | Transmembrane emp24 domain-containing protein 2 OS=Mus musculus GN=Tmed2 PE=1 SV=1                         | 0.02 | 0.00 | 0.02 | 0.03 |
| Q9R0T7 | MCG15085 OS=Mus musculus GN=Try4 PE=2 SV=1                                                                 | 1.00 | 1.00 | 1.00 | 0.00 |
| Q9R0T8 | Inhibitor of nuclear factor kappa-B kinase subunit epsilon OS=Mus musculus GN=Ikbe PE=2 SV=2               | 1.00 | 0.03 | 0.04 | 0.05 |
| Q9R0Y5 | Adenylate kinase isoenzyme 1 OS=Mus musculus GN=Ak1 PE=1 SV=1                                              | 1.00 | 1.00 | 1.00 | 0.03 |
| Q9R1P0 | Proteasome subunit alpha type-4 OS=Mus musculus GN=Psm4 PE=1 SV=1                                          | 1.00 | 0.00 | 1.00 | 1.00 |
| Q9R1P3 | Proteasome subunit beta type-2 OS=Mus musculus GN=Psm2 PE=1 SV=1                                           | 1.00 | 0.02 | 0.02 | 0.02 |

|        |                                                                                                  |      |      |      |      |
|--------|--------------------------------------------------------------------------------------------------|------|------|------|------|
| Q9R1P4 | Proteasome subunit alpha type-1 OS=Mus musculus GN=Psm1 PE=1 SV=1                                | 1.00 | 0.00 | 0.07 | 1.00 |
| Q9WTL8 | Aryl hydrocarbon receptor nuclear translocator-like protein 1 OS=Mus musculus GN=Arntl PE=1 SV=2 | 1.00 | 1.00 | 1.00 | 0.07 |
| Q9WTP6 | Adenylate kinase 2, mitochondrial OS=Mus musculus GN=Ak2 PE=1 SV=5                               | 1.00 | 0.00 | 1.00 | 1.00 |
| Q9WTQ5 | A-kinase anchor protein 12 OS=Mus musculus GN=Akap12 PE=1 SV=1                                   | 1.00 | 0.00 | 0.00 | 0.00 |
| Q9WTX5 | S-phase kinase-associated protein 1 OS=Mus musculus GN=Skp1 PE=1 SV=3                            | 1.00 | 0.02 | 0.02 | 1.00 |
| Q9WUK2 | Eukaryotic translation initiation factor 4H OS=Mus musculus GN=Eif4h PE=1 SV=3                   | 1.00 | 1.00 | 1.00 | 0.02 |
| Q9WUM4 | Coronin-1C OS=Mus musculus GN=Coro1c PE=1 SV=2                                                   | 1.00 | 1.00 | 1.00 | 0.02 |
| Q9WUU7 | Cathepsin Z OS=Mus musculus GN=Ctsz PE=2 SV=1                                                    | 1.00 | 0.02 | 1.00 | 1.00 |
| Q9WV80 | Sorting nexin-1 OS=Mus musculus GN=Snx1 PE=1 SV=1                                                | 1.00 | 1.00 | 0.02 | 0.02 |
| Q9WVA4 | Transgelin-2 OS=Mus musculus GN=Tagln2 PE=1 SV=4                                                 | 1.00 | 0.00 | 0.00 | 0.00 |
| Q9WVK4 | EH domain-containing protein 1 OS=Mus musculus GN=Ehd1 PE=1 SV=1                                 | 1.00 | 1.00 | 1.00 | 0.00 |
| Q9Z0E6 | Interferon-induced guanylate-binding protein 2 OS=Mus musculus GN=Gbp2 PE=1 SV=1                 | 1.00 | 1.00 | 1.00 | 0.00 |
| Q9Z0X1 | Apoptosis-inducing factor 1, mitochondrial OS=Mus musculus GN=Aifm1 PE=1 SV=1                    | 1.00 | 0.00 | 1.00 | 0.06 |
| Q9Z1N5 | Spliceosome RNA helicase Ddx39b OS=Mus musculus GN=Ddx39b PE=1 SV=1                              | 0.05 | 0.03 | 1.00 | 1.00 |
| Q9Z1Q5 | Chloride intracellular channel protein 1 OS=Mus musculus GN=Clic1 PE=1 SV=3                      | 1.00 | 0.00 | 0.02 | 0.02 |
| Q9Z1Q9 | Valyl-tRNA synthetase OS=Mus musculus GN=Vars PE=2 SV=1                                          | 1.00 | 0.02 | 0.02 | 1.00 |
| Q9Z1R9 | MCG124046 OS=Mus musculus GN=Prss1 PE=2 SV=1                                                     | 1.00 | 0.02 | 1.00 | 0.02 |
| Q9Z1T2 | Thrombospondin-4 OS=Mus musculus GN=Thbs4 PE=2 SV=1                                              | 1.00 | 0.05 | 1.00 | 1.00 |
| Q9Z1Z2 | Serine-threonine kinase receptor-associated protein OS=Mus musculus GN=Strap PE=1 SV=2           | 1.00 | 0.02 | 1.00 | 1.00 |
| Q9Z204 | Heterogeneous nuclear ribonucleoproteins C1/C2 OS=Mus musculus GN=Hnrnpc PE=1 SV=1               | 1.00 | 0.00 | 1.00 | 0.00 |
| Q9Z2M7 | Phosphomannomutase 2 OS=Mus musculus GN=Pmm2 PE=2 SV=1                                           | 1.00 | 1.00 | 0.06 | 1.00 |
| Q9Z2U0 | Proteasome subunit alpha type-7 OS=Mus musculus GN=Psm7 PE=1 SV=1                                | 1.00 | 0.00 | 0.00 | 0.00 |
| Q9Z2U1 | Proteasome subunit alpha type-5 OS=Mus musculus GN=Psm5 PE=1 SV=1                                | 1.00 | 1.00 | 1.00 | 0.02 |
| Q9Z2W0 | Aspartyl aminopeptidase OS=Mus musculus GN=Dnpep PE=2 SV=2                                       | 1.00 | 1.00 | 0.02 | 1.00 |
| Q9Z2X1 | Heterogeneous nuclear ribonucleoprotein F OS=Mus musculus GN=Hnrnpf PE=1 SV=3                    | 1.00 | 0.02 | 1.00 | 0.02 |

| Unique Peptides |       |    |     | Spectral Counts |       |    |     | Normalized Spectral Counts |        |        |                       | gene           |
|-----------------|-------|----|-----|-----------------|-------|----|-----|----------------------------|--------|--------|-----------------------|----------------|
| e15.5           | e17.5 | p2 | p14 | e15.5           | e17.5 | p2 | p14 | e15.5                      | e17.5  | p2     | p14                   | gene           |
| 0               | 0     | 1  | 0   | 0               | 0     | 0  | 1   | 0                          | 0.0000 | 0.0000 | 0.0003                | 0.0000 Tbc1d16 |
| 0               | 1     | 0  | 0   | 0               | 0     | 2  | 0   | 0                          | 0.0000 | 0.0003 | 0.0000                | 0.0000 Fsip2   |
| 1               | 0     | 0  | 0   | 0               | 1     | 0  | 0   | 0                          | 0.0008 | 0.0000 | 0.0000                | 0.0000 Agrn    |
| 0               | 5     | 3  | 10  | 0               | 23    | 14 | 47  | 0.0000                     | 0.0032 | 0.0040 | 0.0132 Hbb-b1         |                |
| 0               | 11    | 7  | 8   | 0               | 92    | 32 | 18  | 0.0000                     | 0.0129 | 0.0091 | 0.0051 Cpb1           |                |
| 0               | 0     | 0  | 1   | 0               | 0     | 0  | 1   | 0.0000                     | 0.0000 | 0.0000 | 0.0003 Zcchc11        |                |
| 0               | 1     | 1  | 1   | 0               | 2     | 4  | 2   | 0.0000                     | 0.0003 | 0.0011 | 0.0006 Tpm1           |                |
| 1               | 1     | 1  | 0   | 1               | 6     | 2  | 0   | 0.0008                     | 0.0008 | 0.0006 | 0.0000 Gm9858         |                |
| 1               | 0     | 0  | 0   | 3               | 0     | 0  | 0   | 0.0023                     | 0.0000 | 0.0000 | 0.0000 Stard13        |                |
| 0               | 1     | 3  | 3   | 0               | 1     | 6  | 4   | 0.0000                     | 0.0001 | 0.0017 | 0.0011 Pdia2          |                |
| 0               | 1     | 0  | 0   | 0               | 1     | 0  | 0   | 0.0000                     | 0.0001 | 0.0000 | 0.0000 4930485B16Rik  |                |
| 0               | 0     | 0  | 1   | 0               | 0     | 0  | 1   | 0.0000                     | 0.0000 | 0.0000 | 0.0003 Gstm5          |                |
| 0               | 0     | 0  | 1   | 0               | 0     | 0  | 2   | 0.0000                     | 0.0000 | 0.0000 | 0.0006 Ccdc144b       |                |
| 0               | 1     | 0  | 1   | 0               | 1     | 0  | 2   | 0.0000                     | 0.0001 | 0.0000 | 0.0006 Ryr1           |                |
| 0               | 0     | 1  | 0   | 0               | 0     | 1  | 0   | 0.0000                     | 0.0000 | 0.0003 | 0.0000 Olfr288        |                |
| 0               | 3     | 0  | 0   | 0               | 9     | 0  | 0   | 0.0000                     | 0.0013 | 0.0000 | 0.0000 5430421N21Rik  |                |
| 0               | 3     | 8  | 35  | 0               | 12    | 22 | 74  | 0.0000                     | 0.0017 | 0.0062 | 0.0208 Spna2          |                |
| 0               | 1     | 1  | 3   | 0               | 2     | 3  | 3   | 0.0000                     | 0.0003 | 0.0009 | 0.0008 Tpm1           |                |
| 0               | 2     | 3  | 19  | 0               | 3     | 5  | 48  | 0.0000                     | 0.0004 | 0.0014 | 0.0135 Dsp            |                |
| 0               | 14    | 11 | 44  | 0               | 46    | 33 | 99  | 0.0000                     | 0.0065 | 0.0094 | 0.0279 Ahnak          |                |
| 1               | 1     | 1  | 0   | 1               | 1     | 1  | 0   | 0.0008                     | 0.0001 | 0.0003 | 0.0000 Urb2           |                |
| 0               | 1     | 0  | 0   | 0               | 6     | 0  | 0   | 0.0000                     | 0.0008 | 0.0000 | 0.0000 Fcgbp          |                |
| 1               | 1     | 0  | 0   | 11              | 3     | 0  | 0   | 0.0085                     | 0.0004 | 0.0000 | 0.0000 Upf2           |                |
| 0               | 1     | 0  | 0   | 0               | 2     | 0  | 0   | 0.0000                     | 0.0003 | 0.0000 | 0.0000 D1Ert622e      |                |
| 1               | 1     | 1  | 0   | 5               | 6     | 2  | 0   | 0.0039                     | 0.0008 | 0.0006 | 0.0000 ncharacterized |                |
| 0               | 0     | 1  | 0   | 0               | 0     | 1  | 0   | 0.0000                     | 0.0000 | 0.0003 | 0.0000 Hpn            |                |
| 0               | 0     | 0  | 4   | 0               | 0     | 0  | 6   | 0.0000                     | 0.0000 | 0.0000 | 0.0017 Ahnak2         |                |
| 0               | 0     | 0  | 1   | 0               | 0     | 0  | 1   | 0.0000                     | 0.0000 | 0.0000 | 0.0003 Sec22b         |                |
| 0               | 1     | 1  | 7   | 0               | 14    | 6  | 12  | 0.0000                     | 0.0020 | 0.0017 | 0.0034 Dpysl2         |                |
| 0               | 0     | 1  | 0   | 0               | 0     | 1  | 0   | 0.0000                     | 0.0000 | 0.0003 | 0.0000 Dld            |                |
| 1               | 2     | 0  | 1   | 2               | 2     | 0  | 2   | 0.0015                     | 0.0003 | 0.0000 | 0.0006 Prkcxh         |                |
| 0               | 2     | 1  | 0   | 0               | 5     | 6  | 0   | 0.0000                     | 0.0007 | 0.0017 | 0.0000 Prdx4          |                |
| 0               | 0     | 0  | 2   | 0               | 0     | 0  | 7   | 0.0000                     | 0.0000 | 0.0000 | 0.0020 Ptgis          |                |
| 0               | 0     | 0  | 1   | 0               | 0     | 0  | 1   | 0.0000                     | 0.0000 | 0.0000 | 0.0003 Dpysl4         |                |
| 0               | 1     | 1  | 0   | 0               | 7     | 2  | 0   | 0.0000                     | 0.0010 | 0.0006 | 0.0000 Phb2           |                |
| 0               | 0     | 1  | 0   | 0               | 0     | 2  | 0   | 0.0000                     | 0.0000 | 0.0006 | 0.0000 Srsf5          |                |
| 0               | 0     | 0  | 1   | 0               | 0     | 0  | 1   | 0.0000                     | 0.0000 | 0.0000 | 0.0003 Capn1          |                |
| 0               | 3     | 0  | 0   | 0               | 5     | 0  | 0   | 0.0000                     | 0.0007 | 0.0000 | 0.0000 Anp32a         |                |
| 0               | 0     | 0  | 4   | 0               | 0     | 0  | 7   | 0.0000                     | 0.0000 | 0.0000 | 0.0020 Anxa3          |                |
| 0               | 0     | 0  | 1   | 0               | 0     | 0  | 1   | 0.0000                     | 0.0000 | 0.0000 | 0.0003 Anxa8          |                |
| 0               | 0     | 0  | 1   | 0               | 0     | 0  | 1   | 0.0000                     | 0.0000 | 0.0000 | 0.0003 Myadm          |                |
| 0               | 1     | 0  | 0   | 0               | 2     | 0  | 0   | 0.0000                     | 0.0003 | 0.0000 | 0.0000 Nudc           |                |
| 0               | 1     | 0  | 0   | 0               | 2     | 0  | 0   | 0.0000                     | 0.0003 | 0.0000 | 0.0000 Bcat2          |                |
| 0               | 3     | 3  | 3   | 0               | 7     | 8  | 6   | 0.0000                     | 0.0010 | 0.0023 | 0.0017 Calu           |                |
| 0               | 0     | 1  | 8   | 0               | 0     | 6  | 25  | 0.0000                     | 0.0000 | 0.0017 | 0.0070 Pitr           |                |
| 0               | 1     | 0  | 2   | 0               | 2     | 0  | 4   | 0.0000                     | 0.0003 | 0.0000 | 0.0011 Ddost          |                |
| 1               | 0     | 0  | 0   | 2               | 0     | 0  | 0   | 0.0015                     | 0.0000 | 0.0000 | 0.0000 Aox1           |                |
| 0               | 0     | 1  | 0   | 0               | 0     | 2  | 0   | 0.0000                     | 0.0000 | 0.0006 | 0.0000 Hmgb3          |                |
| 1               | 0     | 0  | 0   | 1               | 0     | 0  | 0   | 0.0008                     | 0.0000 | 0.0000 | 0.0000 Banf1          |                |
| 0               | 1     | 0  | 0   | 0               | 3     | 0  | 0   | 0.0000                     | 0.0004 | 0.0000 | 0.0000 Pgrmc1         |                |
| 0               | 0     | 0  | 1   | 0               | 0     | 0  | 1   | 0.0000                     | 0.0000 | 0.0000 | 0.0003 Impa1          |                |
| 0               | 0     | 0  | 2   | 0               | 0     | 0  | 2   | 0.0000                     | 0.0000 | 0.0000 | 0.0006 Entpd2         |                |
| 0               | 0     | 0  | 1   | 0               | 0     | 0  | 2   | 0.0000                     | 0.0000 | 0.0000 | 0.0006 Copb2          |                |
| 0               | 0     | 3  | 1   | 0               | 0     | 6  | 1   | 0.0000                     | 0.0000 | 0.0017 | 0.0003 7-Sep          |                |
| 0               | 0     | 1  | 1   | 0               | 0     | 4  | 2   | 0.0000                     | 0.0000 | 0.0011 | 0.0006 Rpl35a         |                |
| 0               | 1     | 2  | 0   | 0               | 4     | 5  | 0   | 0.0000                     | 0.0006 | 0.0014 | 0.0000 Psmb5          |                |
| 1               | 2     | 0  | 2   | 2               | 12    | 0  | 3   | 0.0015                     | 0.0017 | 0.0000 | 0.0008 Eef1b          |                |
| 0               | 1     | 0  | 0   | 0               | 1     | 0  | 0   | 0.0000                     | 0.0001 | 0.0000 | 0.0000 Epb41I2        |                |
| 0               | 1     | 1  | 0   | 0               | 8     | 2  | 0   | 0.0000                     | 0.0011 | 0.0006 | 0.0000 Psma3          |                |
| 0               | 0     | 1  | 0   | 0               | 0     | 1  | 0   | 0.0000                     | 0.0000 | 0.0003 | 0.0000 Sfn            |                |
| 0               | 2     | 2  | 2   | 0               | 9     | 8  | 4   | 0.0000                     | 0.0013 | 0.0023 | 0.0011 Ugdh           |                |
| 0               | 0     | 1  | 0   | 0               | 0     | 2  | 0   | 0.0000                     | 0.0000 | 0.0006 | 0.0000 Snx3           |                |
| 0               | 0     | 1  | 0   | 0               | 0     | 2  | 0   | 0.0000                     | 0.0000 | 0.0006 | 0.0000 Wdr1           |                |
| 0               | 0     | 0  | 1   | 0               | 0     | 0  | 1   | 0.0000                     | 0.0000 | 0.0000 | 0.0003 Capns1         |                |
| 0               | 2     | 0  | 0   | 0               | 5     | 0  | 0   | 0.0000                     | 0.0007 | 0.0000 | 0.0000 Dync1i2        |                |
| 7               | 7     | 6  | 7   | 37              | 88    | 28 | 19  | 0.0285                     | 0.0124 | 0.0079 | 0.0054 Hnrmpa2b1      |                |
| 0               | 2     | 2  | 3   | 0               | 4     | 5  | 5   | 0.0000                     | 0.0006 | 0.0014 | 0.0014 Idh1           |                |
| 0               | 0     | 0  | 1   | 0               | 0     | 0  | 1   | 0.0000                     | 0.0000 | 0.0000 | 0.0003 Cyp8b1         |                |
| 1               | 1     | 1  | 0   | 1               | 11    | 4  | 0   | 0.0008                     | 0.0015 | 0.0011 | 0.0000 Rbm3           |                |

|   |    |   |    |    |     |    |     |        |        |        |        |          |
|---|----|---|----|----|-----|----|-----|--------|--------|--------|--------|----------|
| 0 | 1  | 1 | 0  | 0  | 1   | 4  | 0   | 0.0000 | 0.0001 | 0.0011 | 0.0000 | Rnase1   |
| 0 | 22 | 8 | 11 | 0  | 324 | 68 | 41  | 0.0000 | 0.0456 | 0.0193 | 0.0115 | Amy2     |
| 0 | 1  | 0 | 1  | 0  | 1   | 0  | 10  | 0.0000 | 0.0001 | 0.0000 | 0.0028 | Krt1     |
| 0 | 0  | 0 | 3  | 0  | 0   | 0  | 6   | 0.0000 | 0.0000 | 0.0000 | 0.0017 | Fabp4    |
| 1 | 9  | 4 | 2  | 2  | 35  | 15 | 4   | 0.0015 | 0.0049 | 0.0043 | 0.0011 | Aldoa    |
| 0 | 0  | 1 | 0  | 0  | 0   | 1  | 0   | 0.0000 | 0.0000 | 0.0003 | 0.0000 | Got2     |
| 0 | 5  | 2 | 6  | 0  | 58  | 13 | 15  | 0.0000 | 0.0082 | 0.0037 | 0.0042 | Cela2a   |
| 2 | 0  | 0 | 6  | 6  | 0   | 0  | 10  | 0.0046 | 0.0000 | 0.0000 | 0.0028 | Tuba1b   |
| 1 | 3  | 2 | 3  | 3  | 25  | 5  | 4   | 0.0023 | 0.0035 | 0.0014 | 0.0011 | Ldha     |
| 0 | 0  | 2 | 1  | 0  | 0   | 9  | 1   | 0.0000 | 0.0000 | 0.0026 | 0.0003 | Gpi      |
| 0 | 2  | 1 | 3  | 0  | 14  | 11 | 5   | 0.0000 | 0.0020 | 0.0031 | 0.0014 | Prss2    |
| 2 | 6  | 4 | 14 | 11 | 60  | 40 | 66  | 0.0085 | 0.0084 | 0.0114 | 0.0186 | Anxa2    |
| 0 | 1  | 0 | 4  | 0  | 8   | 0  | 6   | 0.0000 | 0.0011 | 0.0000 | 0.0017 | Alb      |
| 3 | 4  | 3 | 3  | 10 | 30  | 16 | 8   | 0.0077 | 0.0042 | 0.0045 | 0.0023 | Hsp90aa1 |
| 3 | 5  | 4 | 4  | 6  | 24  | 9  | 6   | 0.0046 | 0.0034 | 0.0026 | 0.0017 | Pdia4    |
| 4 | 10 | 6 | 15 | 10 | 58  | 23 | 43  | 0.0077 | 0.0082 | 0.0065 | 0.0121 | Hsp90b1  |
| 0 | 1  | 1 | 2  | 0  | 7   | 7  | 6   | 0.0000 | 0.0010 | 0.0020 | 0.0017 | S100a10  |
| 1 | 4  | 3 | 4  | 6  | 34  | 20 | 15  | 0.0046 | 0.0048 | 0.0057 | 0.0042 | Sod1     |
| 0 | 9  | 3 | 6  | 0  | 15  | 23 | 11  | 0.0000 | 0.0021 | 0.0065 | 0.0031 | Mdh2     |
| 1 | 0  | 0 | 1  | 3  | 0   | 0  | 1   | 0.0023 | 0.0000 | 0.0000 | 0.0003 | Krt13    |
| 0 | 0  | 0 | 1  | 0  | 0   | 0  | 1   | 0.0000 | 0.0000 | 0.0000 | 0.0003 | Gnai2    |
| 0 | 1  | 1 | 1  | 0  | 2   | 1  | 1   | 0.0000 | 0.0003 | 0.0003 | 0.0003 | Itgb1    |
| 8 | 12 | 7 | 14 | 37 | 108 | 44 | 41  | 0.0285 | 0.0152 | 0.0125 | 0.0115 | P4hb     |
| 2 | 6  | 6 | 6  | 8  | 29  | 19 | 9   | 0.0062 | 0.0041 | 0.0054 | 0.0025 | Ncl      |
| 0 | 1  | 0 | 1  | 0  | 1   | 0  | 1   | 0.0000 | 0.0001 | 0.0000 | 0.0003 | Pgk1     |
| 0 | 2  | 0 | 0  | 0  | 4   | 0  | 0   | 0.0000 | 0.0006 | 0.0000 | 0.0000 | Hmgn2    |
| 0 | 0  | 4 | 10 | 0  | 0   | 26 | 25  | 0.0000 | 0.0000 | 0.0074 | 0.0070 | Anxa1    |
| 4 | 13 | 6 | 13 | 44 | 109 | 51 | 50  | 0.0340 | 0.0153 | 0.0145 | 0.0141 | Eef1a1   |
| 1 | 3  | 2 | 4  | 2  | 14  | 7  | 10  | 0.0015 | 0.0020 | 0.0020 | 0.0028 | Txn      |
| 0 | 2  | 2 | 4  | 0  | 7   | 15 | 10  | 0.0000 | 0.0010 | 0.0043 | 0.0028 | Gstm1    |
| 1 | 2  | 2 | 3  | 5  | 16  | 9  | 9   | 0.0039 | 0.0023 | 0.0026 | 0.0025 | H1f0     |
| 1 | 2  | 1 | 0  | 2  | 6   | 5  | 0   | 0.0015 | 0.0008 | 0.0014 | 0.0000 | Sub1     |
| 1 | 2  | 2 | 2  | 1  | 13  | 7  | 4   | 0.0008 | 0.0018 | 0.0020 | 0.0011 | Hsp90ab1 |
| 0 | 1  | 1 | 0  | 0  | 1   | 2  | 0   | 0.0000 | 0.0001 | 0.0006 | 0.0000 | Itga5    |
| 0 | 2  | 1 | 2  | 0  | 5   | 1  | 2   | 0.0000 | 0.0007 | 0.0003 | 0.0006 | Rpl7a    |
| 1 | 3  | 4 | 3  | 2  | 20  | 19 | 5   | 0.0015 | 0.0028 | 0.0054 | 0.0014 | Gsn      |
| 1 | 1  | 1 | 1  | 6  | 10  | 6  | 4   | 0.0046 | 0.0014 | 0.0017 | 0.0011 | S100a6   |
| 0 | 1  | 0 | 1  | 0  | 2   | 0  | 2   | 0.0000 | 0.0003 | 0.0000 | 0.0006 | Rpl27a   |
| 0 | 2  | 1 | 1  | 0  | 4   | 1  | 1   | 0.0000 | 0.0006 | 0.0003 | 0.0003 | Rps16    |
| 0 | 1  | 0 | 1  | 0  | 3   | 0  | 2   | 0.0000 | 0.0004 | 0.0000 | 0.0006 | Rpl7     |
| 1 | 2  | 2 | 4  | 8  | 16  | 8  | 10  | 0.0062 | 0.0023 | 0.0023 | 0.0028 | Mdh1     |
| 2 | 4  | 2 | 4  | 13 | 49  | 13 | 10  | 0.0100 | 0.0069 | 0.0037 | 0.0028 | Rpsa     |
| 2 | 7  | 5 | 9  | 6  | 53  | 21 | 22  | 0.0046 | 0.0075 | 0.0060 | 0.0062 | Calr     |
| 0 | 1  | 0 | 0  | 0  | 1   | 0  | 0   | 0.0000 | 0.0001 | 0.0000 | 0.0000 | H2-Q9    |
| 2 | 5  | 5 | 8  | 3  | 21  | 15 | 16  | 0.0023 | 0.0030 | 0.0043 | 0.0045 | Lmnb1    |
| 1 | 9  | 6 | 10 | 2  | 25  | 18 | 18  | 0.0015 | 0.0035 | 0.0051 | 0.0051 | Anxa6    |
| 1 | 2  | 1 | 4  | 1  | 2   | 6  | 8   | 0.0008 | 0.0003 | 0.0017 | 0.0023 | Rplp0    |
| 0 | 1  | 2 | 3  | 0  | 1   | 3  | 7   | 0.0000 | 0.0001 | 0.0009 | 0.0020 | Gstm2    |
| 4 | 8  | 8 | 4  | 32 | 186 | 72 | 42  | 0.0247 | 0.0262 | 0.0204 | 0.0118 | Hist1h1c |
| 0 | 0  | 1 | 0  | 0  | 0   | 1  | 0   | 0.0000 | 0.0000 | 0.0003 | 0.0000 | Klk1     |
| 1 | 6  | 4 | 7  | 7  | 37  | 23 | 40  | 0.0054 | 0.0052 | 0.0065 | 0.0113 | Lgals1   |
| 1 | 4  | 1 | 5  | 2  | 27  | 9  | 10  | 0.0015 | 0.0038 | 0.0026 | 0.0028 | Gapdh    |
| 0 | 0  | 1 | 0  | 0  | 0   | 1  | 0   | 0.0000 | 0.0000 | 0.0003 | 0.0000 | Lamp2    |
| 2 | 7  | 4 | 10 | 14 | 36  | 26 | 22  | 0.0108 | 0.0051 | 0.0074 | 0.0062 | Eno1     |
| 1 | 7  | 2 | 6  | 1  | 33  | 18 | 18  | 0.0008 | 0.0046 | 0.0051 | 0.0051 | Ppia     |
| 3 | 4  | 5 | 6  | 5  | 45  | 25 | 16  | 0.0039 | 0.0063 | 0.0071 | 0.0045 | Tpi1     |
| 0 | 0  | 0 | 1  | 0  | 0   | 0  | 1   | 0.0000 | 0.0000 | 0.0000 | 0.0003 | Lyz1     |
| 1 | 2  | 1 | 0  | 4  | 8   | 4  | 0   | 0.0031 | 0.0011 | 0.0011 | 0.0000 | Pcna     |
| 0 | 0  | 0 | 1  | 0  | 0   | 0  | 2   | 0.0000 | 0.0000 | 0.0000 | 0.0006 | Ctsd     |
| 0 | 0  | 1 | 1  | 0  | 0   | 2  | 2   | 0.0000 | 0.0000 | 0.0006 | 0.0006 | Bsg      |
| 2 | 4  | 1 | 6  | 3  | 35  | 16 | 16  | 0.0023 | 0.0049 | 0.0045 | 0.0045 | Cfl1     |
| 0 | 1  | 0 | 0  | 0  | 1   | 0  | 0   | 0.0000 | 0.0001 | 0.0000 | 0.0000 | Krt19    |
| 0 | 1  | 0 | 3  | 0  | 1   | 0  | 7   | 0.0000 | 0.0001 | 0.0000 | 0.0020 | Gstp1    |
| 0 | 2  | 1 | 2  | 0  | 4   | 6  | 5   | 0.0000 | 0.0006 | 0.0017 | 0.0014 | Rpl13a   |
| 2 | 9  | 4 | 7  | 4  | 49  | 20 | 28  | 0.0031 | 0.0069 | 0.0057 | 0.0079 | Serpinh1 |
| 3 | 13 | 6 | 16 | 6  | 51  | 11 | 44  | 0.0046 | 0.0072 | 0.0031 | 0.0124 | Hspa5    |
| 0 | 0  | 1 | 0  | 0  | 0   | 1  | 0   | 0.0000 | 0.0000 | 0.0003 | 0.0000 | Tmsb4x   |
| 0 | 0  | 1 | 0  | 0  | 0   | 2  | 0   | 0.0000 | 0.0000 | 0.0006 | 0.0000 | Prdx3    |
| 1 | 7  | 9 | 25 | 1  | 35  | 45 | 105 | 0.0008 | 0.0049 | 0.0128 | 0.0296 | Vim      |
| 0 | 0  | 0 | 6  | 0  | 0   | 0  | 12  | 0.0000 | 0.0000 | 0.0000 | 0.0034 | Tgm2     |
| 0 | 3  | 3 | 1  | 0  | 5   | 16 | 2   | 0.0000 | 0.0007 | 0.0045 | 0.0006 | Cbx3     |

|   |    |    |    |    |     |    |    |        |        |        |        |          |
|---|----|----|----|----|-----|----|----|--------|--------|--------|--------|----------|
| 0 | 1  | 1  | 1  | 0  | 1   | 3  | 1  | 0.0000 | 0.0001 | 0.0009 | 0.0003 | Pnp      |
| 0 | 1  | 0  | 0  | 0  | 1   | 0  | 0  | 0.0000 | 0.0001 | 0.0000 | 0.0000 | Cat      |
| 1 | 6  | 2  | 6  | 3  | 34  | 33 | 24 | 0.0023 | 0.0048 | 0.0094 | 0.0068 | Ppib     |
| 1 | 0  | 0  | 0  | 2  | 0   | 0  | 0  | 0.0015 | 0.0000 | 0.0000 | 0.0000 | Mcm3     |
| 0 | 1  | 2  | 2  | 0  | 11  | 6  | 2  | 0.0000 | 0.0015 | 0.0017 | 0.0006 | Rps2     |
| 0 | 1  | 1  | 5  | 0  | 2   | 1  | 9  | 0.0000 | 0.0003 | 0.0003 | 0.0025 | Tin1     |
| 0 | 1  | 1  | 2  | 0  | 12  | 4  | 2  | 0.0000 | 0.0017 | 0.0011 | 0.0006 | Ezr      |
| 1 | 5  | 3  | 4  | 3  | 18  | 11 | 7  | 0.0023 | 0.0025 | 0.0031 | 0.0020 | Msn      |
| 0 | 2  | 0  | 0  | 0  | 4   | 0  | 0  | 0.0000 | 0.0006 | 0.0000 | 0.0000 | Rdx      |
| 3 | 6  | 4  | 3  | 13 | 51  | 11 | 6  | 0.0100 | 0.0072 | 0.0031 | 0.0017 | Ptma     |
| 0 | 0  | 1  | 0  | 0  | 0   | 1  | 0  | 0.0000 | 0.0000 | 0.0003 | 0.0000 | Glud1    |
| 0 | 1  | 0  | 0  | 0  | 1   | 0  | 0  | 0.0000 | 0.0001 | 0.0000 | 0.0000 | Sars     |
| 5 | 6  | 4  | 3  | 33 | 68  | 24 | 9  | 0.0255 | 0.0096 | 0.0068 | 0.0025 | Marcks   |
| 0 | 1  | 4  | 2  | 0  | 2   | 8  | 2  | 0.0000 | 0.0003 | 0.0023 | 0.0006 | Map4     |
| 0 | 1  | 1  | 2  | 0  | 4   | 4  | 2  | 0.0000 | 0.0006 | 0.0011 | 0.0006 | Rpl3     |
| 9 | 14 | 10 | 16 | 33 | 148 | 55 | 56 | 0.0255 | 0.0208 | 0.0156 | 0.0158 | Pdia3    |
| 0 | 0  | 1  | 0  | 0  | 0   | 3  | 0  | 0.0000 | 0.0000 | 0.0009 | 0.0000 | Apex1    |
| 1 | 0  | 0  | 0  | 1  | 0   | 0  | 0  | 0.0008 | 0.0000 | 0.0000 | 0.0000 | Nap111   |
| 0 | 1  | 0  | 0  | 0  | 1   | 0  | 0  | 0.0000 | 0.0001 | 0.0000 | 0.0000 | Nckap1   |
| 2 | 2  | 1  | 0  | 6  | 7   | 2  | 0  | 0.0046 | 0.0010 | 0.0006 | 0.0000 | Marcks1f |
| 0 | 0  | 0  | 1  | 0  | 0   | 0  | 2  | 0.0000 | 0.0000 | 0.0000 | 0.0006 | Dpp4     |
| 1 | 0  | 1  | 0  | 1  | 0   | 2  | 0  | 0.0008 | 0.0000 | 0.0006 | 0.0000 | Pabpc1   |
| 0 | 1  | 2  | 3  | 0  | 5   | 9  | 6  | 0.0000 | 0.0007 | 0.0026 | 0.0017 | Oat      |
| 0 | 1  | 0  | 1  | 0  | 1   | 0  | 3  | 0.0000 | 0.0001 | 0.0000 | 0.0008 | Ppic     |
| 0 | 1  | 1  | 0  | 0  | 1   | 1  | 0  | 0.0000 | 0.0001 | 0.0003 | 0.0000 | Fkbp4    |
| 1 | 5  | 2  | 1  | 3  | 14  | 7  | 1  | 0.0023 | 0.0020 | 0.0020 | 0.0003 | Hmgb2    |
| 0 | 1  | 4  | 2  | 0  | 18  | 10 | 8  | 0.0000 | 0.0025 | 0.0028 | 0.0023 | Des      |
| 0 | 0  | 1  | 0  | 0  | 0   | 1  | 0  | 0.0000 | 0.0000 | 0.0003 | 0.0000 | Dbi      |
| 2 | 1  | 1  | 1  | 5  | 5   | 1  | 1  | 0.0039 | 0.0007 | 0.0003 | 0.0003 | Ranbp1   |
| 1 | 1  | 0  | 0  | 2  | 2   | 0  | 0  | 0.0015 | 0.0003 | 0.0000 | 0.0000 | Mif      |
| 0 | 0  | 0  | 3  | 0  | 0   | 0  | 4  | 0.0000 | 0.0000 | 0.0000 | 0.0011 | Rab5c    |
| 0 | 1  | 0  | 0  | 0  | 1   | 0  | 0  | 0.0000 | 0.0001 | 0.0000 | 0.0000 | Pdha1    |
| 0 | 0  | 0  | 1  | 0  | 0   | 0  | 1  | 0.0000 | 0.0000 | 0.0000 | 0.0003 | Hal      |
| 0 | 2  | 0  | 8  | 0  | 8   | 0  | 14 | 0.0000 | 0.0011 | 0.0000 | 0.0039 | Canx     |
| 2 | 5  | 4  | 8  | 4  | 36  | 20 | 25 | 0.0031 | 0.0051 | 0.0057 | 0.0070 | Prdx1    |
| 0 | 3  | 2  | 4  | 0  | 21  | 16 | 10 | 0.0000 | 0.0030 | 0.0045 | 0.0028 | Rpl12    |
| 0 | 3  | 2  | 3  | 0  | 8   | 12 | 11 | 0.0000 | 0.0011 | 0.0034 | 0.0031 | Rpl18    |
| 0 | 1  | 4  | 2  | 0  | 1   | 10 | 4  | 0.0000 | 0.0001 | 0.0028 | 0.0011 | Tagln    |
| 0 | 0  | 1  | 0  | 0  | 0   | 1  | 0  | 0.0000 | 0.0000 | 0.0003 | 0.0000 | Hmgcl    |
| 0 | 1  | 1  | 1  | 0  | 1   | 4  | 2  | 0.0000 | 0.0001 | 0.0011 | 0.0006 | Cap1     |
| 1 | 2  | 3  | 3  | 2  | 4   | 7  | 4  | 0.0015 | 0.0006 | 0.0020 | 0.0011 | Tkt      |
| 0 | 1  | 0  | 4  | 0  | 2   | 0  | 7  | 0.0000 | 0.0003 | 0.0000 | 0.0020 |          |
| 0 | 1  | 0  | 1  | 0  | 2   | 0  | 1  | 0.0000 | 0.0003 | 0.0000 | 0.0003 | Cct8     |
| 0 | 0  | 2  | 3  | 0  | 0   | 3  | 6  | 0.0000 | 0.0000 | 0.0009 | 0.0017 | Reg1     |
| 0 | 2  | 1  | 2  | 0  | 22  | 7  | 8  | 0.0000 | 0.0031 | 0.0020 | 0.0023 | Hist1h1e |
| 3 | 3  | 2  | 3  | 10 | 47  | 24 | 12 | 0.0077 | 0.0066 | 0.0068 | 0.0034 | Hist1h1a |
| 3 | 6  | 4  | 4  | 5  | 57  | 43 | 22 | 0.0039 | 0.0080 | 0.0122 | 0.0062 | Hist1h1b |
| 0 | 1  | 0  | 0  | 0  | 1   | 0  | 0  | 0.0000 | 0.0001 | 0.0000 | 0.0000 | Hist1h1d |
| 0 | 0  | 0  | 1  | 0  | 0   | 0  | 1  | 0.0000 | 0.0000 | 0.0000 | 0.0003 | Akr1b1   |
| 0 | 0  | 0  | 1  | 0  | 0   | 0  | 1  | 0.0000 | 0.0000 | 0.0000 | 0.0003 | Cfl2     |
| 0 | 1  | 0  | 0  | 0  | 4   | 0  | 0  | 0.0000 | 0.0006 | 0.0000 | 0.0000 | Fkbp2    |
| 0 | 3  | 2  | 3  | 0  | 21  | 7  | 10 | 0.0000 | 0.0030 | 0.0020 | 0.0028 | Aldh2    |
| 0 | 0  | 0  | 1  | 0  | 0   | 0  | 1  | 0.0000 | 0.0000 | 0.0000 | 0.0003 | Aldh3a2  |
| 0 | 1  | 1  | 1  | 0  | 1   | 2  | 2  | 0.0000 | 0.0001 | 0.0006 | 0.0006 | Capza1   |
| 0 | 1  | 1  | 1  | 0  | 1   | 1  | 2  | 0.0000 | 0.0001 | 0.0003 | 0.0006 | Capzb    |
| 0 | 1  | 0  | 0  | 0  | 2   | 0  | 0  | 0.0000 | 0.0003 | 0.0000 | 0.0000 | Igfbp3   |
| 0 | 0  | 1  | 2  | 0  | 0   | 2  | 4  | 0.0000 | 0.0000 | 0.0006 | 0.0011 | Rpl6     |
| 0 | 1  | 0  | 0  | 0  | 2   | 0  | 0  | 0.0000 | 0.0003 | 0.0000 | 0.0000 | Rpl29    |
| 0 | 1  | 0  | 1  | 0  | 4   | 0  | 2  | 0.0000 | 0.0006 | 0.0000 | 0.0006 | Rplp1    |
| 1 | 2  | 2  | 1  | 1  | 7   | 11 | 1  | 0.0008 | 0.0010 | 0.0031 | 0.0003 | Rpl5     |
| 0 | 3  | 2  | 1  | 0  | 12  | 7  | 2  | 0.0000 | 0.0017 | 0.0020 | 0.0006 | Rpl13    |
| 0 | 2  | 1  | 0  | 0  | 4   | 2  | 0  | 0.0000 | 0.0006 | 0.0006 | 0.0000 | Rpl36    |
| 1 | 7  | 5  | 11 | 2  | 53  | 28 | 36 | 0.0015 | 0.0075 | 0.0079 | 0.0101 | Anxa5    |
| 3 | 14 | 11 | 9  | 4  | 62  | 38 | 14 | 0.0031 | 0.0087 | 0.0108 | 0.0039 | Lmna     |
| 0 | 1  | 0  | 0  | 0  | 3   | 0  | 0  | 0.0000 | 0.0004 | 0.0000 | 0.0000 | Bra1     |
| 0 | 1  | 0  | 0  | 0  | 3   | 0  | 0  | 0.0000 | 0.0004 | 0.0000 | 0.0000 | Cbr1     |
| 0 | 1  | 0  | 0  | 0  | 2   | 0  | 0  | 0.0000 | 0.0003 | 0.0000 | 0.0000 | Cox7a2   |
| 1 | 1  | 0  | 0  | 9  | 7   | 0  | 0  | 0.0069 | 0.0010 | 0.0000 | 0.0000 | Dnase1   |
| 4 | 6  | 3  | 3  | 27 | 32  | 11 | 5  | 0.0208 | 0.0045 | 0.0031 | 0.0014 | Hnrmpa1  |
| 0 | 1  | 0  | 0  | 0  | 1   | 0  | 0  | 0.0000 | 0.0001 | 0.0000 | 0.0000 | Psma2    |
| 0 | 0  | 1  | 2  | 0  | 0   | 2  | 9  | 0.0000 | 0.0000 | 0.0006 | 0.0025 | Cav1     |

2-Sep

|   |    |   |    |    |     |    |    |        |        |        |        |          |
|---|----|---|----|----|-----|----|----|--------|--------|--------|--------|----------|
| 0 | 1  | 0 | 0  | 0  | 4   | 0  | 0  | 0.0000 | 0.0006 | 0.0000 | 0.0000 | Cdkn1c   |
| 1 | 4  | 3 | 7  | 1  | 15  | 14 | 18 | 0.0008 | 0.0021 | 0.0040 | 0.0051 | Ahcy     |
| 0 | 1  | 0 | 1  | 0  | 3   | 0  | 4  | 0.0000 | 0.0004 | 0.0000 | 0.0011 | S100a11  |
| 2 | 3  | 4 | 0  | 5  | 5   | 9  | 0  | 0.0039 | 0.0007 | 0.0026 | 0.0000 | Pa2g4    |
| 0 | 1  | 1 | 2  | 0  | 1   | 4  | 3  | 0.0000 | 0.0001 | 0.0011 | 0.0008 | Rab7a    |
| 0 | 0  | 1 | 1  | 0  | 0   | 1  | 1  | 0.0000 | 0.0000 | 0.0003 | 0.0003 | Acadl    |
| 0 | 0  | 0 | 2  | 0  | 0   | 0  | 3  | 0.0000 | 0.0000 | 0.0000 | 0.0008 | Rpl9     |
| 0 | 0  | 1 | 0  | 0  | 0   | 0  | 3  | 0.0000 | 0.0000 | 0.0009 | 0.0000 | Hsd17b4  |
| 0 | 3  | 1 | 1  | 0  | 14  | 4  | 1  | 0.0000 | 0.0020 | 0.0011 | 0.0003 | Hdgf     |
| 3 | 10 | 3 | 10 | 5  | 62  | 14 | 21 | 0.0039 | 0.0087 | 0.0040 | 0.0059 | Pkm2     |
| 0 | 1  | 0 | 0  | 0  | 1   | 0  | 0  | 0.0000 | 0.0001 | 0.0000 | 0.0000 | Efna1    |
| 1 | 1  | 0 | 0  | 1  | 1   | 0  | 0  | 0.0008 | 0.0001 | 0.0000 | 0.0000 | Hmga2    |
| 0 | 1  | 1 | 1  | 0  | 1   | 2  | 1  | 0.0000 | 0.0001 | 0.0006 | 0.0003 | Rpl10a   |
| 0 | 3  | 4 | 6  | 0  | 13  | 15 | 12 | 0.0000 | 0.0018 | 0.0043 | 0.0034 | Idh2     |
| 1 | 3  | 0 | 0  | 2  | 3   | 0  | 0  | 0.0015 | 0.0004 | 0.0000 | 0.0000 | Stmn1    |
| 0 | 0  | 0 | 1  | 0  | 0   | 0  | 1  | 0.0000 | 0.0000 | 0.0000 | 0.0003 | Cyb5a    |
| 4 | 6  | 3 | 9  | 21 | 22  | 9  | 17 | 0.0162 | 0.0031 | 0.0026 | 0.0048 | Atp5b    |
| 1 | 1  | 0 | 1  | 2  | 1   | 0  | 1  | 0.0015 | 0.0001 | 0.0000 | 0.0003 | Ucp3     |
| 1 | 3  | 3 | 2  | 2  | 13  | 13 | 4  | 0.0015 | 0.0018 | 0.0037 | 0.0011 | Fus      |
| 0 | 1  | 0 | 0  | 0  | 2   | 0  | 0  | 0.0000 | 0.0003 | 0.0000 | 0.0000 | Erp29    |
| 0 | 1  | 1 | 2  | 0  | 1   | 7  | 3  | 0.0000 | 0.0001 | 0.0020 | 0.0008 | Eef1d    |
| 0 | 1  | 1 | 5  | 0  | 2   | 3  | 6  | 0.0000 | 0.0003 | 0.0009 | 0.0017 | Actn4    |
| 1 | 11 | 7 | 11 | 4  | 35  | 31 | 19 | 0.0031 | 0.0049 | 0.0088 | 0.0054 | Eef2     |
| 1 | 2  | 2 | 2  | 2  | 14  | 12 | 3  | 0.0015 | 0.0020 | 0.0034 | 0.0008 | Tpm1     |
| 0 | 0  | 0 | 1  | 0  | 0   | 0  | 1  | 0.0000 | 0.0000 | 0.0000 | 0.0003 | Tnks1bp1 |
| 0 | 1  | 0 | 0  | 0  | 1   | 0  | 0  | 0.0000 | 0.0001 | 0.0000 | 0.0000 | Slc12a3  |
| 0 | 0  | 1 | 0  | 0  | 0   | 1  | 0  | 0.0000 | 0.0000 | 0.0000 | 0.0000 | Ruvbl1   |
| 0 | 1  | 1 | 1  | 0  | 13  | 5  | 2  | 0.0000 | 0.0018 | 0.0014 | 0.0006 | Pcbp1    |
| 0 | 2  | 1 | 0  | 0  | 3   | 3  | 0  | 0.0000 | 0.0004 | 0.0009 | 0.0000 | Cdc42    |
| 0 | 0  | 0 | 1  | 0  | 0   | 0  | 1  | 0.0000 | 0.0000 | 0.0000 | 0.0003 | Cirbp    |
| 1 | 4  | 1 | 2  | 2  | 9   | 3  | 5  | 0.0015 | 0.0013 | 0.0009 | 0.0014 | Eif4a1   |
| 1 | 2  | 2 | 2  | 1  | 17  | 11 | 10 | 0.0008 | 0.0024 | 0.0031 | 0.0028 | Rps20    |
| 1 | 2  | 1 | 2  | 4  | 18  | 5  | 2  | 0.0031 | 0.0025 | 0.0014 | 0.0006 | Ube2n    |
| 1 | 1  | 0 | 0  | 3  | 5   | 0  | 0  | 0.0023 | 0.0007 | 0.0000 | 0.0000 | Drd2     |
| 2 | 2  | 1 | 0  | 5  | 11  | 1  | 0  | 0.0039 | 0.0015 | 0.0003 | 0.0000 | Rpl26    |
| 0 | 1  | 1 | 1  | 0  | 2   | 4  | 2  | 0.0000 | 0.0003 | 0.0011 | 0.0006 | Rpl27    |
| 1 | 1  | 1 | 1  | 1  | 13  | 4  | 2  | 0.0008 | 0.0018 | 0.0011 | 0.0006 | Arf4     |
| 0 | 1  | 0 | 2  | 0  | 1   | 0  | 4  | 0.0000 | 0.0001 | 0.0000 | 0.0011 | Dad1     |
| 0 | 1  | 2 | 0  | 0  | 17  | 10 | 0  | 0.0000 | 0.0024 | 0.0028 | 0.0000 | Sumo2    |
| 4 | 12 | 8 | 10 | 21 | 84  | 36 | 23 | 0.0162 | 0.0118 | 0.0102 | 0.0065 | Hnmpk    |
| 0 | 1  | 2 | 3  | 0  | 6   | 8  | 7  | 0.0000 | 0.0008 | 0.0023 | 0.0020 | Ywhag    |
| 0 | 0  | 0 | 1  | 0  | 0   | 0  | 2  | 0.0000 | 0.0000 | 0.0000 | 0.0006 | Rras2    |
| 0 | 2  | 0 | 3  | 0  | 4   | 0  | 4  | 0.0000 | 0.0006 | 0.0000 | 0.0011 | Rps7     |
| 0 | 1  | 0 | 0  | 0  | 7   | 0  | 0  | 0.0000 | 0.0010 | 0.0000 | 0.0000 | Ppp1ca   |
| 0 | 1  | 0 | 0  | 0  | 3   | 0  | 0  | 0.0000 | 0.0004 | 0.0000 | 0.0000 | Ppp1cb   |
| 0 | 2  | 1 | 2  | 0  | 4   | 2  | 4  | 0.0000 | 0.0006 | 0.0006 | 0.0011 | Calm1    |
| 1 | 2  | 2 | 3  | 2  | 8   | 8  | 8  | 0.0015 | 0.0011 | 0.0023 | 0.0023 | Rps8     |
| 0 | 1  | 1 | 2  | 0  | 5   | 2  | 3  | 0.0000 | 0.0007 | 0.0006 | 0.0008 | Rps15a   |
| 3 | 7  | 2 | 3  | 9  | 32  | 7  | 12 | 0.0069 | 0.0045 | 0.0020 | 0.0034 | Ywhae    |
| 1 | 2  | 2 | 1  | 1  | 20  | 10 | 2  | 0.0008 | 0.0028 | 0.0028 | 0.0006 | Rps14    |
| 2 | 4  | 4 | 1  | 8  | 22  | 13 | 1  | 0.0062 | 0.0031 | 0.0037 | 0.0003 | Rps18    |
| 0 | 0  | 1 | 0  | 0  | 0   | 1  | 0  | 0.0000 | 0.0000 | 0.0003 | 0.0000 | Rps11    |
| 0 | 1  | 0 | 0  | 0  | 3   | 0  | 0  | 0.0000 | 0.0004 | 0.0000 | 0.0000 | Rps13    |
| 0 | 2  | 0 | 1  | 0  | 4   | 0  | 1  | 0.0000 | 0.0006 | 0.0000 | 0.0003 | Snrpe    |
| 0 | 2  | 1 | 0  | 0  | 8   | 4  | 0  | 0.0000 | 0.0011 | 0.0011 | 0.0000 | Snrpf    |
| 1 | 0  | 0 | 0  | 1  | 0   | 0  | 0  | 0.0008 | 0.0000 | 0.0000 | 0.0000 | Snrpg    |
| 0 | 1  | 0 | 1  | 0  | 1   | 0  | 2  | 0.0000 | 0.0001 | 0.0000 | 0.0006 | Snrpd1   |
| 0 | 1  | 2 | 0  | 0  | 10  | 3  | 0  | 0.0000 | 0.0014 | 0.0009 | 0.0000 | Snrpd2   |
| 0 | 1  | 0 | 0  | 0  | 2   | 0  | 0  | 0.0000 | 0.0003 | 0.0000 | 0.0000 | Snrpd3   |
| 0 | 2  | 3 | 2  | 0  | 3   | 6  | 3  | 0.0000 | 0.0004 | 0.0017 | 0.0008 | Rab11a   |
| 0 | 1  | 1 | 0  | 0  | 2   | 4  | 0  | 0.0000 | 0.0003 | 0.0011 | 0.0000 | Tsc22d1  |
| 1 | 3  | 1 | 2  | 1  | 8   | 2  | 6  | 0.0008 | 0.0011 | 0.0006 | 0.0017 | Rps4x    |
| 0 | 0  | 1 | 0  | 0  | 0   | 4  | 0  | 0.0000 | 0.0000 | 0.0011 | 0.0000 | Rpl18a   |
| 1 | 3  | 4 | 2  | 3  | 8   | 13 | 4  | 0.0023 | 0.0011 | 0.0037 | 0.0011 | Rpl23a   |
| 0 | 2  | 0 | 0  | 0  | 4   | 0  | 0  | 0.0000 | 0.0006 | 0.0000 | 0.0000 | Rps6     |
| 5 | 7  | 5 | 6  | 91 | 206 | 83 | 67 | 0.0702 | 0.0290 | 0.0236 | 0.0189 | Hist1h4a |
| 0 | 0  | 0 | 1  | 0  | 0   | 0  | 2  | 0.0000 | 0.0000 | 0.0000 | 0.0006 | Rab1A    |
| 2 | 3  | 2 | 2  | 8  | 19  | 9  | 7  | 0.0062 | 0.0027 | 0.0026 | 0.0020 | Ran      |
| 0 | 0  | 0 | 2  | 0  | 0   | 0  | 6  | 0.0000 | 0.0000 | 0.0000 | 0.0017 | Rpl23    |
| 0 | 1  | 1 | 1  | 0  | 11  | 6  | 1  | 0.0000 | 0.0015 | 0.0017 | 0.0003 | Rps15    |
| 1 | 0  | 0 | 1  | 1  | 0   | 0  | 2  | 0.0008 | 0.0000 | 0.0000 | 0.0006 | Rps24    |

|   |    |   |    |    |    |    |    |        |        |        |        |          |
|---|----|---|----|----|----|----|----|--------|--------|--------|--------|----------|
| 0 | 2  | 1 | 2  | 0  | 10 | 7  | 3  | 0.0000 | 0.0014 | 0.0020 | 0.0008 | Rps25    |
| 0 | 2  | 1 | 1  | 0  | 10 | 6  | 2  | 0.0000 | 0.0014 | 0.0017 | 0.0006 | Rps26    |
| 0 | 2  | 1 | 1  | 0  | 13 | 4  | 3  | 0.0000 | 0.0018 | 0.0011 | 0.0008 | Rps28    |
| 0 | 1  | 0 | 0  | 0  | 8  | 0  | 0  | 0.0000 | 0.0011 | 0.0000 | 0.0000 | Tceb2    |
| 0 | 1  | 0 | 1  | 0  | 1  | 0  | 1  | 0.0000 | 0.0001 | 0.0000 | 0.0003 | Gnb2     |
| 0 | 1  | 0 | 2  | 0  | 3  | 0  | 3  | 0.0000 | 0.0004 | 0.0000 | 0.0008 | Rpl30    |
| 1 | 1  | 1 | 1  | 2  | 3  | 3  | 3  | 0.0015 | 0.0004 | 0.0009 | 0.0008 | Ypl31    |
| 1 | 1  | 1 | 3  | 2  | 1  | 7  | 7  | 0.0015 | 0.0001 | 0.0020 | 0.0020 | Rps3     |
| 0 | 0  | 1 | 1  | 0  | 0  | 4  | 2  | 0.0000 | 0.0000 | 0.0011 | 0.0006 | Rpl32    |
| 2 | 2  | 2 | 2  | 12 | 10 | 8  | 2  | 0.0093 | 0.0014 | 0.0023 | 0.0006 | Rpl8     |
| 0 | 2  | 1 | 2  | 0  | 11 | 6  | 5  | 0.0000 | 0.0015 | 0.0017 | 0.0014 | Ybx1     |
| 1 | 5  | 1 | 5  | 1  | 19 | 1  | 12 | 0.0008 | 0.0027 | 0.0003 | 0.0034 | Pfn1     |
| 0 | 1  | 0 | 0  | 0  | 1  | 0  | 0  | 0.0000 | 0.0001 | 0.0000 | 0.0000 | Crabp1   |
| 2 | 2  | 2 | 2  | 3  | 19 | 6  | 6  | 0.0023 | 0.0027 | 0.0017 | 0.0017 | Uba52    |
| 0 | 0  | 0 | 1  | 0  | 0  | 0  | 1  | 0.0000 | 0.0000 | 0.0000 | 0.0003 | Tra2b    |
| 0 | 0  | 1 | 0  | 0  | 0  | 2  | 0  | 0.0000 | 0.0000 | 0.0006 | 0.0000 | Pafah1b1 |
| 3 | 19 | 6 | 14 | 13 | 77 | 31 | 38 | 0.0100 | 0.0108 | 0.0088 | 0.0107 | Hspa8    |
| 0 | 0  | 0 | 1  | 0  | 0  | 0  | 2  | 0.0000 | 0.0000 | 0.0000 | 0.0006 | Tpt1     |
| 3 | 9  | 6 | 3  | 18 | 58 | 26 | 8  | 0.0139 | 0.0082 | 0.0074 | 0.0023 | Hspd1    |
| 0 | 1  | 0 | 1  | 0  | 7  | 0  | 1  | 0.0000 | 0.0010 | 0.0000 | 0.0003 | Mapk1    |
| 5 | 11 | 3 | 9  | 14 | 87 | 19 | 29 | 0.0108 | 0.0122 | 0.0054 | 0.0082 | Ywhaz    |
| 4 | 10 | 7 | 4  | 13 | 36 | 47 | 24 | 0.0100 | 0.0051 | 0.0133 | 0.0068 | Hmgb1    |
| 1 | 0  | 0 | 0  | 1  | 0  | 0  | 0  | 0.0008 | 0.0000 | 0.0000 | 0.0000 | Snrpn    |
| 1 | 2  | 1 | 4  | 8  | 7  | 2  | 8  | 0.0062 | 0.0010 | 0.0006 | 0.0023 | Eif5a    |
| 0 | 1  | 1 | 1  | 0  | 5  | 6  | 4  | 0.0000 | 0.0007 | 0.0017 | 0.0011 | Crip1    |
| 2 | 12 | 5 | 12 | 8  | 99 | 67 | 86 | 0.0062 | 0.0139 | 0.0190 | 0.0242 | Actg1    |
| 0 | 1  | 0 | 1  | 0  | 2  | 0  | 1  | 0.0000 | 0.0003 | 0.0000 | 0.0003 | Rps17    |
| 0 | 1  | 1 | 1  | 0  | 7  | 2  | 1  | 0.0000 | 0.0010 | 0.0006 | 0.0003 | Rps12    |
| 1 | 1  | 1 | 0  | 7  | 2  | 1  | 0  | 0.0054 | 0.0003 | 0.0003 | 0.0000 | Rps10    |
| 0 | 0  | 1 | 0  | 0  | 0  | 1  | 0  | 0.0000 | 0.0000 | 0.0003 | 0.0000 | Phb      |
| 0 | 0  | 1 | 0  | 0  | 0  | 2  | 0  | 0.0000 | 0.0000 | 0.0006 | 0.0000 | Csnk2b   |
| 0 | 2  | 2 | 2  | 0  | 6  | 16 | 5  | 0.0000 | 0.0008 | 0.0045 | 0.0014 | Rpl22    |
| 0 | 1  | 1 | 0  | 0  | 2  | 2  | 0  | 0.0000 | 0.0003 | 0.0006 | 0.0000 | Ube2l3   |
| 0 | 0  | 1 | 1  | 0  | 0  | 3  | 2  | 0.0000 | 0.0000 | 0.0009 | 0.0006 | Gnb2l1   |
| 3 | 3  | 4 | 5  | 62 | 90 | 42 | 18 | 0.0478 | 0.0127 | 0.0119 | 0.0051 | Acta1    |
| 2 | 2  | 1 | 4  | 4  | 21 | 8  | 13 | 0.0031 | 0.0030 | 0.0023 | 0.0037 | Ywhaq    |
| 1 | 4  | 1 | 4  | 1  | 9  | 9  | 11 | 0.0008 | 0.0013 | 0.0026 | 0.0031 | Tuba1a   |
| 0 | 0  | 0 | 2  | 0  | 0  | 0  | 4  | 0.0000 | 0.0000 | 0.0000 | 0.0011 | Tubb2c   |
| 2 | 2  | 1 | 1  | 4  | 3  | 4  | 2  | 0.0031 | 0.0004 | 0.0011 | 0.0006 | Hist1h3a |
| 1 | 3  | 2 | 4  | 1  | 19 | 6  | 5  | 0.0008 | 0.0027 | 0.0017 | 0.0014 | Ywhah    |
| 0 | 1  | 0 | 0  | 0  | 2  | 0  | 0  | 0.0000 | 0.0003 | 0.0000 | 0.0000 | Zhx1     |
| 0 | 0  | 1 | 3  | 0  | 0  | 1  | 5  | 0.0000 | 0.0000 | 0.0003 | 0.0014 | Kpnb1    |
| 0 | 2  | 1 | 0  | 0  | 3  | 3  | 0  | 0.0000 | 0.0004 | 0.0009 | 0.0000 | Psemb7   |
| 0 | 1  | 0 | 3  | 0  | 7  | 0  | 6  | 0.0000 | 0.0010 | 0.0000 | 0.0017 | Pebp1    |
| 0 | 2  | 1 | 2  | 0  | 10 | 10 | 8  | 0.0000 | 0.0014 | 0.0028 | 0.0023 | Hnmph2   |
| 0 | 0  | 1 | 1  | 0  | 0  | 8  | 4  | 0.0000 | 0.0000 | 0.0023 | 0.0011 | Hint1    |
| 0 | 1  | 1 | 0  | 0  | 9  | 3  | 0  | 0.0000 | 0.0013 | 0.0009 | 0.0000 | Elavl1   |
| 0 | 0  | 1 | 2  | 0  | 0  | 4  | 5  | 0.0000 | 0.0000 | 0.0011 | 0.0014 | Slc9a3r1 |
| 0 | 0  | 1 | 0  | 0  | 0  | 1  | 0  | 0.0000 | 0.0000 | 0.0003 | 0.0000 | Cct7     |
| 0 | 1  | 0 | 1  | 0  | 1  | 0  | 1  | 0.0000 | 0.0001 | 0.0000 | 0.0003 | Cct4     |
| 0 | 0  | 0 | 1  | 0  | 0  | 0  | 1  | 0.0000 | 0.0000 | 0.0000 | 0.0003 | Cct5     |
| 0 | 1  | 1 | 1  | 0  | 3  | 3  | 2  | 0.0000 | 0.0004 | 0.0009 | 0.0006 | Cbx1     |
| 0 | 4  | 1 | 4  | 0  | 18 | 2  | 9  | 0.0000 | 0.0025 | 0.0006 | 0.0025 | Arf1     |
| 1 | 1  | 1 | 2  | 4  | 6  | 3  | 4  | 0.0031 | 0.0008 | 0.0009 | 0.0011 | Rpl19    |
| 1 | 1  | 0 | 1  | 2  | 2  | 0  | 2  | 0.0015 | 0.0003 | 0.0000 | 0.0006 | Srsf3    |
| 1 | 1  | 0 | 1  | 11 | 2  | 0  | 5  | 0.0085 | 0.0003 | 0.0000 | 0.0014 | Hist1h3b |
| 1 | 1  | 0 | 1  | 2  | 2  | 0  | 2  | 0.0015 | 0.0003 | 0.0000 | 0.0006 | H3f3a    |
| 0 | 0  | 1 | 1  | 0  | 0  | 1  | 1  | 0.0000 | 0.0000 | 0.0003 | 0.0003 | Nptn     |
| 0 | 0  | 1 | 0  | 0  | 0  | 1  | 0  | 0.0000 | 0.0000 | 0.0003 | 0.0000 | Mcm2     |
| 0 | 0  | 0 | 1  | 0  | 0  | 0  | 1  | 0.0000 | 0.0000 | 0.0003 | 0.0000 | Csrp1    |
| 0 | 0  | 0 | 1  | 0  | 0  | 0  | 2  | 0.0000 | 0.0000 | 0.0000 | 0.0006 | Pkp1     |
| 0 | 2  | 3 | 1  | 0  | 2  | 4  | 2  | 0.0000 | 0.0003 | 0.0011 | 0.0006 | Rps3a    |
| 0 | 0  | 1 | 1  | 0  | 0  | 2  | 2  | 0.0000 | 0.0000 | 0.0006 | 0.0006 | S100a13  |
| 1 | 0  | 1 | 1  | 2  | 0  | 1  | 5  | 0.0015 | 0.0000 | 0.0003 | 0.0014 | Psme1    |
| 0 | 0  | 0 | 1  | 0  | 0  | 0  | 1  | 0.0000 | 0.0000 | 0.0000 | 0.0003 | Psme2    |
| 0 | 1  | 2 | 4  | 0  | 1  | 11 | 9  | 0.0000 | 0.0001 | 0.0031 | 0.0025 | Anxa4    |
| 0 | 0  | 1 | 1  | 0  | 0  | 3  | 1  | 0.0000 | 0.0000 | 0.0009 | 0.0003 | Fhl1     |
| 0 | 0  | 1 | 2  | 0  | 0  | 2  | 3  | 0.0000 | 0.0000 | 0.0006 | 0.0008 | Anpep    |
| 0 | 1  | 0 | 0  | 0  | 2  | 0  | 0  | 0.0000 | 0.0003 | 0.0000 | 0.0000 | Atp5j    |
| 0 | 1  | 0 | 0  | 0  | 1  | 0  | 0  | 0.0000 | 0.0001 | 0.0000 | 0.0000 | Shbg     |
| 0 | 1  | 0 | 2  | 0  | 2  | 0  | 2  | 0.0000 | 0.0003 | 0.0000 | 0.0006 | Fh       |



|   |    |   |    |    |     |    |    |        |        |        |        |          |
|---|----|---|----|----|-----|----|----|--------|--------|--------|--------|----------|
| 0 | 0  | 0 | 2  | 0  | 0   | 0  | 3  | 0.0000 | 0.0000 | 0.0000 | 0.0008 | G3bp1    |
| 0 | 1  | 2 | 8  | 0  | 6   | 9  | 26 | 0.0000 | 0.0008 | 0.0026 | 0.0073 | Tubb5    |
| 0 | 2  | 0 | 0  | 0  | 2   | 0  | 0  | 0.0000 | 0.0003 | 0.0000 | 0.0000 | Psmb4    |
| 3 | 2  | 1 | 2  | 6  | 18  | 3  | 5  | 0.0046 | 0.0025 | 0.0009 | 0.0014 | Rplp2    |
| 0 | 1  | 0 | 3  | 0  | 2   | 0  | 5  | 0.0000 | 0.0003 | 0.0000 | 0.0014 | Prdx5    |
| 0 | 0  | 0 | 1  | 0  | 0   | 0  | 1  | 0.0000 | 0.0000 | 0.0000 | 0.0003 | Xdh      |
| 0 | 1  | 1 | 3  | 0  | 2   | 1  | 8  | 0.0000 | 0.0003 | 0.0003 | 0.0023 | Rbp1     |
| 0 | 0  | 1 | 0  | 0  | 0   | 4  | 0  | 0.0000 | 0.0000 | 0.0011 | 0.0000 | Hnmpul2  |
| 0 | 0  | 0 | 1  | 0  | 0   | 0  | 2  | 0.0000 | 0.0000 | 0.0000 | 0.0006 | Rsu1     |
| 1 | 5  | 4 | 6  | 2  | 28  | 35 | 14 | 0.0015 | 0.0039 | 0.0099 | 0.0039 | Nme2     |
| 1 | 4  | 0 | 5  | 1  | 12  | 0  | 11 | 0.0008 | 0.0017 | 0.0000 | 0.0031 | Vcp      |
| 1 | 3  | 3 | 8  | 1  | 15  | 9  | 11 | 0.0008 | 0.0021 | 0.0026 | 0.0031 | Uba1     |
| 0 | 0  | 0 | 8  | 0  | 0   | 0  | 18 | 0.0000 | 0.0000 | 0.0000 | 0.0051 | Jup      |
| 1 | 3  | 1 | 5  | 2  | 6   | 10 | 9  | 0.0015 | 0.0008 | 0.0028 | 0.0025 | Atp5a1   |
| 0 | 0  | 0 | 2  | 0  | 0   | 0  | 2  | 0.0000 | 0.0000 | 0.0000 | 0.0006 | Ckb      |
| 0 | 0  | 1 | 1  | 0  | 0   | 2  | 1  | 0.0000 | 0.0000 | 0.0006 | 0.0003 | Col6a1   |
| 0 | 0  | 1 | 1  | 0  | 0   | 4  | 2  | 0.0000 | 0.0000 | 0.0011 | 0.0006 | Rac2     |
| 1 | 2  | 1 | 2  | 1  | 6   | 1  | 6  | 0.0008 | 0.0008 | 0.0003 | 0.0017 | Rcn1     |
| 1 | 2  | 2 | 3  | 2  | 13  | 13 | 4  | 0.0015 | 0.0018 | 0.0037 | 0.0011 | Fabp5    |
| 0 | 1  | 1 | 0  | 0  | 2   | 5  | 0  | 0.0000 | 0.0003 | 0.0014 | 0.0000 | Atp5i    |
| 1 | 8  | 4 | 0  | 2  | 16  | 12 | 0  | 0.0015 | 0.0023 | 0.0034 | 0.0000 | Igf2r    |
| 0 | 0  | 1 | 0  | 0  | 0   | 2  | 0  | 0.0000 | 0.0000 | 0.0006 | 0.0000 | P311     |
| 0 | 0  | 0 | 1  | 0  | 0   | 0  | 2  | 0.0000 | 0.0000 | 0.0000 | 0.0000 | Tgm3     |
| 0 | 1  | 0 | 0  | 0  | 2   | 0  | 0  | 0.0000 | 0.0003 | 0.0000 | 0.0000 | Dlk1     |
| 0 | 0  | 0 | 2  | 0  | 0   | 0  | 3  | 0.0000 | 0.0000 | 0.0000 | 0.0008 | Krt80    |
| 0 | 0  | 0 | 1  | 0  | 0   | 0  | 4  | 0.0000 | 0.0000 | 0.0000 | 0.0011 | Flg2     |
| 0 | 0  | 0 | 1  | 0  | 0   | 0  | 2  | 0.0000 | 0.0000 | 0.0000 | 0.0006 | Hp1bp3   |
| 0 | 3  | 3 | 3  | 0  | 14  | 11 | 10 | 0.0000 | 0.0020 | 0.0031 | 0.0028 | Myl12b   |
| 1 | 1  | 0 | 3  | 2  | 1   | 0  | 4  | 0.0015 | 0.0001 | 0.0000 | 0.0011 | H2afv    |
| 0 | 1  | 0 | 0  | 0  | 2   | 0  | 0  | 0.0000 | 0.0003 | 0.0000 | 0.0000 | Lig2     |
| 1 | 7  | 2 | 5  | 2  | 29  | 9  | 14 | 0.0015 | 0.0041 | 0.0026 | 0.0039 | Pdia6    |
| 0 | 1  | 1 | 0  | 0  | 2   | 4  | 0  | 0.0000 | 0.0003 | 0.0011 | 0.0000 | Srsf6    |
| 1 | 0  | 0 | 0  | 1  | 0   | 0  | 0  | 0.0008 | 0.0000 | 0.0000 | 0.0000 | Mphosph8 |
| 0 | 3  | 2 | 1  | 0  | 11  | 3  | 1  | 0.0000 | 0.0015 | 0.0009 | 0.0003 | Khsrp    |
| 0 | 0  | 1 | 0  | 0  | 0   | 1  | 0  | 0.0000 | 0.0000 | 0.0003 | 0.0000 | Ddb1     |
| 0 | 0  | 0 | 1  | 0  | 0   | 0  | 2  | 0.0000 | 0.0000 | 0.0000 | 0.0006 | Esy1     |
| 0 | 1  | 0 | 0  | 0  | 2   | 0  | 0  | 0.0000 | 0.0003 | 0.0000 | 0.0000 | Agap2    |
| 0 | 0  | 0 | 1  | 0  | 0   | 0  | 1  | 0.0000 | 0.0000 | 0.0000 | 0.0003 | Pdap1    |
| 1 | 0  | 0 | 0  | 1  | 0   | 0  | 0  | 0.0008 | 0.0000 | 0.0000 | 0.0000 | Sf3b2    |
| 0 | 1  | 0 | 0  | 0  | 1   | 0  | 0  | 0.0000 | 0.0001 | 0.0000 | 0.0000 | Plcl1    |
| 0 | 0  | 0 | 2  | 0  | 0   | 0  | 3  | 0.0000 | 0.0000 | 0.0000 | 0.0008 | Fam129a  |
| 0 | 0  | 1 | 0  | 0  | 0   | 1  | 0  | 0.0000 | 0.0000 | 0.0003 | 0.0000 | Gm1661   |
| 0 | 0  | 0 | 1  | 0  | 0   | 0  | 2  | 0.0000 | 0.0000 | 0.0000 | 0.0006 | Dnah12   |
| 0 | 0  | 0 | 1  | 0  | 0   | 0  | 1  | 0.0000 | 0.0000 | 0.0000 | 0.0003 | Lepre1   |
| 1 | 0  | 0 | 0  | 1  | 0   | 0  | 0  | 0.0008 | 0.0000 | 0.0000 | 0.0000 | Psg28    |
| 0 | 0  | 0 | 1  | 0  | 0   | 0  | 2  | 0.0000 | 0.0000 | 0.0000 | 0.0006 | Xirp2    |
| 0 | 1  | 0 | 0  | 0  | 2   | 0  | 0  | 0.0000 | 0.0003 | 0.0000 | 0.0000 | Ppp3ca   |
| 1 | 1  | 0 | 2  | 5  | 9   | 0  | 3  | 0.0039 | 0.0013 | 0.0000 | 0.0008 | Ddx17    |
| 0 | 8  | 1 | 0  | 0  | 26  | 3  | 0  | 0.0000 | 0.0037 | 0.0009 | 0.0000 | Cpa2     |
| 0 | 0  | 0 | 1  | 0  | 0   | 0  | 2  | 0.0000 | 0.0000 | 0.0000 | 0.0006 | DXBay18  |
| 0 | 5  | 5 | 7  | 0  | 32  | 18 | 12 | 0.0000 | 0.0045 | 0.0051 | 0.0034 | Tpm3     |
| 1 | 20 | 8 | 12 | 10 | 287 | 55 | 38 | 0.0077 | 0.0404 | 0.0156 | 0.0107 | Pnliprp1 |
| 0 | 1  | 0 | 0  | 0  | 1   | 0  | 0  | 0.0000 | 0.0001 | 0.0000 | 0.0000 | Rgag4    |
| 0 | 1  | 0 | 0  | 0  | 1   | 0  | 0  | 0.0000 | 0.0001 | 0.0000 | 0.0000 | Trpm3    |
| 0 | 0  | 0 | 1  | 0  | 0   | 0  | 1  | 0.0000 | 0.0000 | 0.0000 | 0.0003 | Arcn1    |
| 0 | 1  | 2 | 3  | 0  | 6   | 16 | 9  | 0.0000 | 0.0008 | 0.0045 | 0.0025 | Myl6     |
| 1 | 1  | 0 | 1  | 3  | 16  | 0  | 2  | 0.0023 | 0.0023 | 0.0000 | 0.0006 | Akap4    |
| 0 | 2  | 1 | 2  | 0  | 2   | 2  | 5  | 0.0000 | 0.0003 | 0.0006 | 0.0014 | Hnmpd    |
| 0 | 2  | 1 | 1  | 0  | 16  | 9  | 2  | 0.0000 | 0.0023 | 0.0026 | 0.0006 | Psmb6    |
| 0 | 0  | 0 | 3  | 0  | 0   | 0  | 5  | 0.0000 | 0.0000 | 0.0000 | 0.0014 | P4ha1    |
| 0 | 1  | 1 | 0  | 0  | 6   | 2  | 0  | 0.0000 | 0.0008 | 0.0006 | 0.0000 | P4ha2    |
| 0 | 1  | 1 | 1  | 0  | 1   | 6  | 2  | 0.0000 | 0.0001 | 0.0017 | 0.0006 | Bag1     |
| 0 | 1  | 0 | 0  | 0  | 2   | 0  | 0  | 0.0000 | 0.0003 | 0.0000 | 0.0000 | Igf1r    |
| 0 | 2  | 0 | 1  | 0  | 3   | 0  | 2  | 0.0000 | 0.0004 | 0.0000 | 0.0006 | Naca     |
| 0 | 0  | 0 | 2  | 0  | 0   | 0  | 4  | 0.0000 | 0.0000 | 0.0000 | 0.0011 | Serpib6  |
| 0 | 1  | 1 | 0  | 0  | 1   | 1  | 0  | 0.0000 | 0.0001 | 0.0003 | 0.0000 | Stip1    |
| 0 | 0  | 0 | 1  | 0  | 0   | 0  | 1  | 0.0000 | 0.0000 | 0.0000 | 0.0003 | Caprin1  |
| 0 | 0  | 1 | 0  | 0  | 0   | 1  | 0  | 0.0000 | 0.0000 | 0.0003 | 0.0000 | Reep5    |
| 0 | 0  | 0 | 1  | 0  | 0   | 0  | 1  | 0.0000 | 0.0000 | 0.0000 | 0.0003 | Vdac3    |
| 0 | 2  | 3 | 2  | 0  | 13  | 5  | 4  | 0.0000 | 0.0018 | 0.0014 | 0.0011 | Vdac1    |
| 0 | 0  | 2 | 0  | 0  | 0   | 3  | 0  | 0.0000 | 0.0000 | 0.0009 | 0.0000 | Dmbt1    |

|   |    |   |    |    |     |    |    |        |        |        |        |           |
|---|----|---|----|----|-----|----|----|--------|--------|--------|--------|-----------|
| 0 | 1  | 2 | 2  | 0  | 1   | 5  | 3  | 0.0000 | 0.0001 | 0.0014 | 0.0008 | Tmpo      |
| 0 | 1  | 1 | 0  | 0  | 2   | 1  | 0  | 0.0000 | 0.0003 | 0.0003 | 0.0000 | Hars      |
| 1 | 5  | 1 | 4  | 3  | 14  | 4  | 7  | 0.0023 | 0.0020 | 0.0011 | 0.0020 | Prdx2     |
| 0 | 1  | 1 | 0  | 0  | 13  | 1  | 0  | 0.0000 | 0.0018 | 0.0003 | 0.0000 | Psap      |
| 0 | 1  | 0 | 0  | 0  | 2   | 0  | 0  | 0.0000 | 0.0003 | 0.0000 | 0.0000 | Pde3b     |
| 0 | 2  | 0 | 0  | 0  | 6   | 0  | 0  | 0.0000 | 0.0008 | 0.0000 | 0.0000 | Hadh      |
| 0 | 2  | 0 | 0  | 0  | 8   | 0  | 0  | 0.0000 | 0.0011 | 0.0000 | 0.0000 | Ewsr1     |
| 0 | 3  | 3 | 2  | 0  | 5   | 9  | 2  | 0.0000 | 0.0007 | 0.0026 | 0.0006 | Fscn1     |
| 0 | 0  | 0 | 1  | 0  | 0   | 0  | 1  | 0.0000 | 0.0000 | 0.0000 | 0.0003 | Gdi2      |
| 0 | 0  | 0 | 1  | 0  | 0   | 0  | 2  | 0.0000 | 0.0000 | 0.0000 | 0.0006 | Arhgdib   |
| 0 | 1  | 2 | 0  | 0  | 1   | 4  | 0  | 0.0000 | 0.0001 | 0.0011 | 0.0000 | Phgdh     |
| 0 | 0  | 0 | 1  | 0  | 0   | 0  | 2  | 0.0000 | 0.0000 | 0.0000 | 0.0006 | Lasp1     |
| 0 | 0  | 0 | 1  | 0  | 0   | 0  | 2  | 0.0000 | 0.0000 | 0.0000 | 0.0006 | Myh10     |
| 2 | 4  | 2 | 4  | 11 | 33  | 15 | 10 | 0.0085 | 0.0046 | 0.0043 | 0.0028 | Npm1      |
| 0 | 0  | 0 | 2  | 0  | 0   | 0  | 3  | 0.0000 | 0.0000 | 0.0000 | 0.0008 | Pcbp2     |
| 0 | 1  | 1 | 1  | 0  | 3   | 6  | 2  | 0.0000 | 0.0004 | 0.0017 | 0.0006 | Pea15     |
| 0 | 1  | 0 | 1  | 0  | 9   | 0  | 2  | 0.0000 | 0.0013 | 0.0000 | 0.0006 | Srsf2     |
| 0 | 1  | 0 | 1  | 0  | 1   | 0  | 2  | 0.0000 | 0.0001 | 0.0000 | 0.0006 | Aldh1a2   |
| 1 | 0  | 1 | 0  | 1  | 0   | 2  | 0  | 0.0008 | 0.0000 | 0.0006 | 0.0000 | Ddx3x     |
| 0 | 1  | 1 | 2  | 0  | 2   | 4  | 3  | 0.0000 | 0.0003 | 0.0011 | 0.0008 | Dpysl3    |
| 0 | 1  | 1 | 0  | 0  | 3   | 1  | 0  | 0.0000 | 0.0004 | 0.0003 | 0.0000 | Snrpa     |
| 0 | 1  | 8 | 27 | 0  | 1   | 23 | 57 | 0.0000 | 0.0001 | 0.0065 | 0.0161 | Sptbn1    |
| 0 | 1  | 0 | 0  | 0  | 2   | 0  | 0  | 0.0000 | 0.0003 | 0.0000 | 0.0000 | Trim28    |
| 0 | 1  | 0 | 0  | 0  | 1   | 0  | 0  | 0.0000 | 0.0001 | 0.0000 | 0.0000 | Snmp70    |
| 0 | 1  | 0 | 0  | 0  | 10  | 0  | 0  | 0.0000 | 0.0014 | 0.0000 | 0.0000 | Fkbp3     |
| 0 | 1  | 2 | 3  | 0  | 3   | 6  | 6  | 0.0000 | 0.0004 | 0.0017 | 0.0017 | Vat1      |
| 0 | 1  | 1 | 1  | 0  | 14  | 6  | 2  | 0.0000 | 0.0020 | 0.0017 | 0.0006 | Selenbp2  |
| 0 | 0  | 0 | 1  | 0  | 0   | 0  | 1  | 0.0000 | 0.0000 | 0.0000 | 0.0003 | Sdpr      |
| 1 | 0  | 1 | 0  | 1  | 0   | 1  | 0  | 0.0008 | 0.0000 | 0.0003 | 0.0000 | Raly      |
| 0 | 1  | 0 | 0  | 0  | 1   | 0  | 0  | 0.0000 | 0.0001 | 0.0000 | 0.0000 | Ccpq1     |
| 0 | 6  | 1 | 4  | 0  | 25  | 3  | 9  | 0.0000 | 0.0035 | 0.0009 | 0.0025 | Cel       |
| 0 | 1  | 0 | 0  | 0  | 2   | 0  | 0  | 0.0000 | 0.0003 | 0.0000 | 0.0000 | Cd34      |
| 1 | 3  | 2 | 2  | 10 | 26  | 17 | 4  | 0.0077 | 0.0037 | 0.0048 | 0.0011 | Hspe1     |
| 2 | 2  | 0 | 3  | 30 | 42  | 0  | 14 | 0.0231 | 0.0059 | 0.0000 | 0.0039 | Hist2h2ab |
| 0 | 1  | 4 | 8  | 0  | 4   | 7  | 14 | 0.0000 | 0.0006 | 0.0020 | 0.0039 | Vcl       |
| 0 | 0  | 0 | 2  | 0  | 0   | 0  | 2  | 0.0000 | 0.0000 | 0.0000 | 0.0006 | Cltc      |
| 0 | 1  | 0 | 0  | 0  | 3   | 0  | 0  | 0.0000 | 0.0004 | 0.0000 | 0.0000 | Morc3     |
| 0 | 0  | 0 | 1  | 0  | 0   | 0  | 1  | 0.0000 | 0.0000 | 0.0000 | 0.0003 | Nlrp14    |
| 1 | 1  | 0 | 1  | 2  | 2   | 0  | 1  | 0.0015 | 0.0003 | 0.0000 | 0.0003 | Gm9839    |
| 1 | 0  | 0 | 3  | 1  | 0   | 0  | 5  | 0.0008 | 0.0000 | 0.0000 | 0.0014 | Krt77     |
| 0 | 6  | 4 | 6  | 0  | 34  | 16 | 10 | 0.0000 | 0.0048 | 0.0045 | 0.0028 | Tpm4      |
| 0 | 0  | 1 | 0  | 0  | 0   | 1  | 0  | 0.0000 | 0.0000 | 0.0003 | 0.0000 | Sri       |
| 0 | 0  | 0 | 1  | 0  | 0   | 0  | 1  | 0.0000 | 0.0000 | 0.0000 | 0.0003 | Mapk4     |
| 0 | 1  | 0 | 1  | 0  | 5   | 0  | 1  | 0.0000 | 0.0007 | 0.0000 | 0.0003 | Trak2     |
| 0 | 1  | 0 | 0  | 0  | 1   | 0  | 0  | 0.0000 | 0.0001 | 0.0000 | 0.0000 | Smarcc2   |
| 2 | 4  | 1 | 0  | 7  | 4   | 6  | 0  | 0.0054 | 0.0006 | 0.0017 | 0.0000 | Srsf1     |
| 0 | 0  | 1 | 0  | 0  | 0   | 0  | 1  | 0.0000 | 0.0000 | 0.0003 | 0.0000 | Mylk      |
| 0 | 0  | 1 | 0  | 0  | 0   | 2  | 0  | 0.0000 | 0.0000 | 0.0006 | 0.0000 | Rcor3     |
| 0 | 0  | 1 | 0  | 0  | 0   | 1  | 0  | 0.0000 | 0.0000 | 0.0003 | 0.0000 | Rbm15b    |
| 0 | 1  | 0 | 1  | 0  | 2   | 0  | 2  | 0.0000 | 0.0003 | 0.0000 | 0.0006 | Tpm2      |
| 0 | 1  | 0 | 1  | 0  | 3   | 0  | 2  | 0.0000 | 0.0004 | 0.0000 | 0.0006 | Ubr2      |
| 0 | 2  | 1 | 1  | 0  | 3   | 7  | 2  | 0.0000 | 0.0004 | 0.0020 | 0.0006 | Kctd12    |
| 1 | 1  | 0 | 0  | 1  | 1   | 0  | 0  | 0.0008 | 0.0001 | 0.0000 | 0.0000 | Kdm3b     |
| 0 | 1  | 1 | 1  | 0  | 6   | 2  | 1  | 0.0000 | 0.0008 | 0.0006 | 0.0003 | Rps9      |
| 0 | 0  | 1 | 0  | 0  | 0   | 2  | 0  | 0.0000 | 0.0000 | 0.0006 | 0.0000 | Rps27     |
| 0 | 0  | 0 | 2  | 0  | 0   | 0  | 3  | 0.0000 | 0.0000 | 0.0000 | 0.0008 | Rpl10     |
| 1 | 1  | 1 | 1  | 5  | 17  | 3  | 2  | 0.0039 | 0.0024 | 0.0009 | 0.0006 | Rpl35     |
| 0 | 0  | 1 | 0  | 0  | 0   | 1  | 0  | 0.0000 | 0.0000 | 0.0003 | 0.0000 | Eif2s1    |
| 0 | 3  | 3 | 0  | 0  | 4   | 8  | 0  | 0.0000 | 0.0006 | 0.0023 | 0.0000 | Snd1      |
| 0 | 1  | 1 | 0  | 0  | 6   | 7  | 0  | 0.0000 | 0.0008 | 0.0020 | 0.0000 | Gm5771    |
| 0 | 3  | 2 | 0  | 0  | 22  | 6  | 0  | 0.0000 | 0.0031 | 0.0017 | 0.0000 | Prss3     |
| 0 | 3  | 1 | 1  | 0  | 7   | 5  | 4  | 0.0000 | 0.0010 | 0.0014 | 0.0011 | Try10     |
| 0 | 2  | 1 | 3  | 0  | 5   | 6  | 6  | 0.0000 | 0.0007 | 0.0017 | 0.0017 | Syncrip   |
| 0 | 1  | 0 | 0  | 0  | 5   | 0  | 0  | 0.0000 | 0.0007 | 0.0000 | 0.0000 | Luc7l2    |
| 1 | 0  | 0 | 3  | 1  | 0   | 0  | 5  | 0.0008 | 0.0000 | 0.0000 | 0.0014 | Actn1     |
| 1 | 14 | 6 | 7  | 1  | 158 | 39 | 25 | 0.0008 | 0.0222 | 0.0111 | 0.0070 | Cpa1      |
| 1 | 0  | 0 | 0  | 3  | 0   | 0  | 0  | 0.0023 | 0.0000 | 0.0000 | 0.0000 | Nav3      |
| 0 | 0  | 0 | 1  | 0  | 0   | 0  | 1  | 0.0000 | 0.0000 | 0.0000 | 0.0003 | Znf579    |
| 0 | 0  | 1 | 0  | 0  | 0   | 2  | 0  | 0.0000 | 0.0000 | 0.0006 | 0.0000 | Mtdh      |
| 0 | 1  | 1 | 0  | 0  | 2   | 1  | 0  | 0.0000 | 0.0003 | 0.0003 | 0.0000 | Jph4      |
| 0 | 0  | 1 | 4  | 0  | 0   | 1  | 7  | 0.0000 | 0.0000 | 0.0003 | 0.0020 | Flnb      |

|   |    |    |    |     |     |    |    |        |        |        |        |                |
|---|----|----|----|-----|-----|----|----|--------|--------|--------|--------|----------------|
| 0 | 1  | 0  | 0  | 0   | 2   | 0  | 0  | 0.0000 | 0.0003 | 0.0000 | 0.0000 | BC051142       |
| 0 | 1  | 0  | 0  | 0   | 3   | 0  | 0  | 0.0000 | 0.0004 | 0.0000 | 0.0000 | Nucks1         |
| 0 | 0  | 1  | 0  | 0   | 0   | 2  | 0  | 0.0000 | 0.0000 | 0.0000 | 0.0006 | Tufm           |
| 0 | 0  | 1  | 0  | 0   | 0   | 1  | 0  | 0.0000 | 0.0000 | 0.0003 | 0.0000 | Cpped1         |
| 2 | 4  | 4  | 6  | 24  | 36  | 21 | 20 | 0.0185 | 0.0051 | 0.0060 | 0.0056 | Hnrmpa3        |
| 1 | 0  | 0  | 0  | 1   | 0   | 0  | 0  | 0.0008 | 0.0000 | 0.0000 | 0.0000 | Eif4b          |
| 0 | 0  | 0  | 1  | 0   | 0   | 0  | 1  | 0.0000 | 0.0000 | 0.0000 | 0.0003 | Mak16          |
| 0 | 0  | 0  | 3  | 0   | 0   | 0  | 7  | 0.0000 | 0.0000 | 0.0000 | 0.0020 | Ehd2           |
| 0 | 0  | 1  | 0  | 0   | 0   | 3  | 0  | 0.0000 | 0.0000 | 0.0009 | 0.0000 | Echs1          |
| 0 | 2  | 1  | 4  | 0   | 4   | 3  | 7  | 0.0000 | 0.0006 | 0.0009 | 0.0020 | Rcn3           |
| 0 | 1  | 0  | 0  | 0   | 1   | 0  | 0  | 0.0000 | 0.0001 | 0.0000 | 0.0000 | Ganab          |
| 0 | 1  | 0  | 0  | 0   | 1   | 0  | 0  | 0.0000 | 0.0001 | 0.0000 | 0.0000 | Sgta           |
| 0 | 1  | 0  | 0  | 0   | 1   | 0  | 0  | 0.0000 | 0.0001 | 0.0000 | 0.0000 | Rcc2           |
| 0 | 2  | 1  | 0  | 0   | 4   | 2  | 0  | 0.0000 | 0.0006 | 0.0006 | 0.0000 | Srsf7          |
| 2 | 8  | 6  | 9  | 6   | 38  | 22 | 23 | 0.0046 | 0.0053 | 0.0062 | 0.0065 | Ckap4          |
| 0 | 0  | 3  | 2  | 0   | 0   | 5  | 4  | 0.0000 | 0.0000 | 0.0014 | 0.0011 | Hadha          |
| 0 | 0  | 1  | 1  | 0   | 0   | 1  | 2  | 0.0000 | 0.0000 | 0.0003 | 0.0006 | Rpl24          |
| 0 | 0  | 0  | 1  | 0   | 0   | 0  | 1  | 0.0000 | 0.0000 | 0.0000 | 0.0003 | Rcn2           |
| 0 | 0  | 0  | 1  | 0   | 0   | 0  | 2  | 0.0000 | 0.0000 | 0.0000 | 0.0000 | Asph           |
| 0 | 0  | 1  | 0  | 0   | 0   | 1  | 0  | 0.0000 | 0.0000 | 0.0003 | 0.0000 | Lig4           |
| 0 | 10 | 12 | 6  | 0   | 30  | 36 | 9  | 0.0000 | 0.0042 | 0.0102 | 0.0025 | Flna           |
| 0 | 0  | 1  | 1  | 0   | 0   | 2  | 2  | 0.0000 | 0.0000 | 0.0006 | 0.0006 | Aifm2          |
| 0 | 0  | 0  | 4  | 0   | 0   | 0  | 6  | 0.0000 | 0.0000 | 0.0000 | 0.0017 | Acaa2          |
| 0 | 1  | 0  | 0  | 0   | 1   | 0  | 0  | 0.0000 | 0.0001 | 0.0000 | 0.0000 | Pxk            |
| 0 | 0  | 0  | 1  | 0   | 0   | 0  | 1  | 0.0000 | 0.0000 | 0.0000 | 0.0003 | Asrgl1         |
| 0 | 0  | 0  | 1  | 0   | 0   | 0  | 2  | 0.0000 | 0.0000 | 0.0000 | 0.0006 | ncharacterized |
| 0 | 3  | 1  | 1  | 0   | 10  | 2  | 1  | 0.0000 | 0.0014 | 0.0006 | 0.0003 | 11-Sep         |
| 0 | 0  | 1  | 0  | 0   | 0   | 1  | 0  | 0.0000 | 0.0000 | 0.0003 | 0.0000 | Gykl1          |
| 1 | 0  | 0  | 0  | 1   | 0   | 0  | 0  | 0.0008 | 0.0000 | 0.0000 | 0.0000 | Tceal5         |
| 0 | 1  | 2  | 0  | 0   | 3   | 6  | 0  | 0.0000 | 0.0004 | 0.0017 | 0.0000 | Txn1           |
| 0 | 1  | 0  | 0  | 0   | 1   | 0  | 0  | 0.0000 | 0.0001 | 0.0000 | 0.0000 | Qrfp           |
| 4 | 6  | 5  | 6  | 117 | 171 | 37 | 52 | 0.0903 | 0.0241 | 0.0105 | 0.0146 | Hist1h2bp      |
| 0 | 0  | 0  | 1  | 0   | 0   | 0  | 1  | 0.0000 | 0.0000 | 0.0000 | 0.0003 | Copa           |
| 0 | 0  | 0  | 1  | 0   | 0   | 0  | 2  | 0.0000 | 0.0000 | 0.0000 | 0.0006 | Fgb            |
| 0 | 1  | 1  | 1  | 0   | 6   | 2  | 2  | 0.0000 | 0.0008 | 0.0006 | 0.0006 | Tpm3           |
| 1 | 1  | 1  | 1  | 3   | 3   | 6  | 2  | 0.0023 | 0.0004 | 0.0017 | 0.0006 | Sdha           |
| 1 | 1  | 0  | 0  | 1   | 1   | 0  | 0  | 0.0008 | 0.0001 | 0.0000 | 0.0000 | P2rx2          |
| 0 | 0  | 1  | 0  | 0   | 0   | 2  | 0  | 0.0000 | 0.0000 | 0.0006 | 0.0000 | Pof1b          |
| 0 | 0  | 0  | 1  | 0   | 0   | 0  | 1  | 0.0000 | 0.0000 | 0.0000 | 0.0003 | Lgi2           |
| 0 | 2  | 0  | 3  | 0   | 2   | 0  | 6  | 0.0000 | 0.0003 | 0.0000 | 0.0017 | Acat1          |
| 0 | 1  | 0  | 0  | 0   | 1   | 0  | 0  | 0.0000 | 0.0001 | 0.0000 | 0.0000 | Gspt1          |
| 0 | 4  | 0  | 0  | 0   | 7   | 0  | 0  | 0.0000 | 0.0010 | 0.0000 | 0.0000 | Hnrmp1         |
| 1 | 1  | 0  | 1  | 11  | 36  | 0  | 16 | 0.0085 | 0.0051 | 0.0000 | 0.0045 | H2afj          |
| 0 | 1  | 1  | 1  | 0   | 3   | 6  | 6  | 0.0000 | 0.0004 | 0.0017 | 0.0017 | Ssspta         |
| 0 | 0  | 1  | 0  | 0   | 0   | 2  | 0  | 0.0000 | 0.0000 | 0.0006 | 0.0000 | Ushbp1         |
| 0 | 1  | 1  | 0  | 0   | 1   | 2  | 0  | 0.0000 | 0.0001 | 0.0006 | 0.0000 | Actr1b         |
| 1 | 0  | 0  | 0  | 1   | 0   | 0  | 0  | 0.0008 | 0.0000 | 0.0000 | 0.0000 | Sgms1          |
| 0 | 3  | 1  | 3  | 0   | 9   | 4  | 6  | 0.0000 | 0.0013 | 0.0011 | 0.0017 | Cald1          |
| 0 | 0  | 3  | 15 | 0   | 0   | 7  | 26 | 0.0000 | 0.0000 | 0.0020 | 0.0073 | Myh9           |
| 0 | 0  | 0  | 1  | 0   | 0   | 0  | 1  | 0.0000 | 0.0000 | 0.0000 | 0.0003 | Atp1a1         |
| 0 | 0  | 0  | 1  | 0   | 0   | 0  | 1  | 0.0000 | 0.0000 | 0.0000 | 0.0003 | rotein         |
| 1 | 1  | 1  | 1  | 1   | 4   | 5  | 1  | 0.0008 | 0.0006 | 0.0014 | 0.0003 | Srsf4          |
| 1 | 3  | 3  | 5  | 2   | 15  | 11 | 9  | 0.0015 | 0.0021 | 0.0031 | 0.0025 | Hnrmpu         |
| 0 | 0  | 1  | 0  | 0   | 0   | 1  | 0  | 0.0000 | 0.0000 | 0.0003 | 0.0000 | Olf1317        |
| 0 | 1  | 0  | 0  | 0   | 1   | 0  | 0  | 0.0000 | 0.0001 | 0.0000 | 0.0000 | Olf1516        |
| 0 | 2  | 1  | 2  | 0   | 3   | 2  | 2  | 0.0000 | 0.0004 | 0.0006 | 0.0006 | Hnrmp1         |
| 1 | 3  | 3  | 1  | 4   | 18  | 14 | 5  | 0.0031 | 0.0025 | 0.0040 | 0.0014 | Sfpq           |
| 0 | 1  | 0  | 0  | 0   | 2   | 0  | 0  | 0.0000 | 0.0003 | 0.0000 | 0.0000 | Slc12a5        |
| 0 | 1  | 0  | 0  | 0   | 2   | 0  | 0  | 0.0000 | 0.0003 | 0.0000 | 0.0000 | Rab14          |
| 0 | 0  | 0  | 1  | 0   | 0   | 0  | 3  | 0.0000 | 0.0000 | 0.0000 | 0.0008 | Rps5           |
| 0 | 0  | 0  | 1  | 0   | 0   | 0  | 1  | 0.0000 | 0.0000 | 0.0000 | 0.0003 | Isoc1          |
| 1 | 1  | 2  | 3  | 3   | 16  | 13 | 16 | 0.0023 | 0.0023 | 0.0037 | 0.0045 | Hba-a1         |
| 0 | 0  | 4  | 1  | 0   | 0   | 7  | 2  | 0.0000 | 0.0000 | 0.0020 | 0.0006 | Rnh1           |
| 0 | 1  | 1  | 2  | 0   | 1   | 2  | 2  | 0.0000 | 0.0001 | 0.0006 | 0.0006 | Rbmx11         |
| 0 | 0  | 1  | 0  | 0   | 0   | 1  | 0  | 0.0000 | 0.0000 | 0.0003 | 0.0000 | Ppa2           |
| 0 | 3  | 1  | 3  | 0   | 6   | 6  | 9  | 0.0000 | 0.0008 | 0.0017 | 0.0025 | Txndc5         |
| 0 | 1  | 0  | 1  | 0   | 4   | 0  | 1  | 0.0000 | 0.0006 | 0.0000 | 0.0003 | Fubp1          |
| 0 | 0  | 1  | 0  | 0   | 0   | 1  | 0  | 0.0000 | 0.0000 | 0.0003 | 0.0000 | Yars           |
| 0 | 4  | 1  | 4  | 0   | 28  | 4  | 11 | 0.0000 | 0.0039 | 0.0011 | 0.0031 | Cela1          |
| 3 | 8  | 6  | 4  | 6   | 82  | 27 | 6  | 0.0046 | 0.0115 | 0.0077 | 0.0017 | Basp1          |
| 0 | 1  | 0  | 0  | 0   | 2   | 0  | 0  | 0.0000 | 0.0003 | 0.0000 | 0.0000 | F11            |

|   |   |   |    |    |     |    |    |        |        |        |        |               |
|---|---|---|----|----|-----|----|----|--------|--------|--------|--------|---------------|
| 0 | 0 | 1 | 0  | 0  | 0   | 1  | 0  | 0.0000 | 0.0000 | 0.0003 | 0.0000 | Wasl          |
| 0 | 1 | 1 | 3  | 0  | 1   | 4  | 6  | 0.0000 | 0.0001 | 0.0011 | 0.0017 | Rpn1          |
| 1 | 1 | 1 | 1  | 7  | 3   | 1  | 1  | 0.0054 | 0.0004 | 0.0003 | 0.0003 | Nrif2         |
| 0 | 1 | 0 | 1  | 0  | 3   | 0  | 3  | 0.0000 | 0.0004 | 0.0000 | 0.0008 | Tardbp        |
| 0 | 1 | 0 | 0  | 0  | 2   | 0  | 0  | 0.0000 | 0.0003 | 0.0000 | 0.0000 | Tf            |
| 0 | 0 | 0 | 1  | 0  | 0   | 0  | 2  | 0.0000 | 0.0000 | 0.0000 | 0.0006 | Tubb6         |
| 1 | 3 | 2 | 1  | 1  | 8   | 3  | 2  | 0.0008 | 0.0011 | 0.0009 | 0.0006 | Ptbp1         |
| 1 | 4 | 2 | 5  | 6  | 22  | 14 | 24 | 0.0046 | 0.0031 | 0.0040 | 0.0068 | Krt5          |
| 0 | 1 | 0 | 0  | 0  | 4   | 0  | 0  | 0.0000 | 0.0006 | 0.0000 | 0.0000 | Sf3b5         |
| 0 | 1 | 0 | 3  | 0  | 2   | 0  | 4  | 0.0000 | 0.0003 | 0.0000 | 0.0011 | Taldo1        |
| 0 | 2 | 0 | 2  | 0  | 17  | 0  | 6  | 0.0000 | 0.0024 | 0.0000 | 0.0017 | Hnmpab        |
| 0 | 0 | 0 | 1  | 0  | 0   | 0  | 2  | 0.0000 | 0.0000 | 0.0000 | 0.0006 | Nans          |
| 0 | 0 | 1 | 0  | 0  | 0   | 1  | 0  | 0.0000 | 0.0000 | 0.0003 | 0.0000 | Psip1         |
| 0 | 1 | 1 | 1  | 0  | 4   | 3  | 2  | 0.0000 | 0.0006 | 0.0009 | 0.0006 | Rap1b         |
| 0 | 1 | 0 | 0  | 0  | 1   | 0  | 0  | 0.0000 | 0.0001 | 0.0000 | 0.0000 | Ggt7          |
| 0 | 0 | 0 | 3  | 0  | 0   | 0  | 4  | 0.0000 | 0.0000 | 0.0000 | 0.0011 | Actr3         |
| 0 | 2 | 1 | 0  | 0  | 4   | 4  | 0  | 0.0000 | 0.0006 | 0.0011 | 0.0000 | Nono          |
| 0 | 0 | 0 | 1  | 0  | 0   | 0  | 1  | 0.0000 | 0.0000 | 0.0000 | 0.0003 | Vwa5a         |
| 0 | 0 | 1 | 0  | 0  | 0   | 2  | 0  | 0.0000 | 0.0000 | 0.0006 | 0.0000 | Card14        |
| 0 | 2 | 1 | 2  | 0  | 4   | 2  | 5  | 0.0000 | 0.0006 | 0.0006 | 0.0014 | Tmed9         |
| 0 | 0 | 1 | 1  | 0  | 0   | 2  | 2  | 0.0000 | 0.0000 | 0.0006 | 0.0006 | Aco2          |
| 0 | 0 | 0 | 1  | 0  | 0   | 0  | 1  | 0.0000 | 0.0000 | 0.0000 | 0.0003 | Dctn2         |
| 0 | 0 | 0 | 1  | 0  | 0   | 0  | 2  | 0.0000 | 0.0000 | 0.0000 | 0.0006 | Dnajb11       |
| 0 | 0 | 0 | 1  | 0  | 0   | 0  | 2  | 0.0000 | 0.0000 | 0.0000 | 0.0006 | St13          |
| 0 | 1 | 0 | 1  | 0  | 2   | 0  | 3  | 0.0000 | 0.0003 | 0.0000 | 0.0008 | Etfa          |
| 0 | 0 | 1 | 0  | 0  | 0   | 2  | 0  | 0.0000 | 0.0000 | 0.0006 | 0.0000 | Ddah2         |
| 0 | 1 | 0 | 0  | 0  | 1   | 0  | 0  | 0.0000 | 0.0001 | 0.0000 | 0.0000 | Gpx7          |
| 0 | 0 | 1 | 2  | 0  | 0   | 1  | 3  | 0.0000 | 0.0000 | 0.0003 | 0.0008 | Park7         |
| 0 | 1 | 1 | 0  | 0  | 10  | 3  | 0  | 0.0000 | 0.0014 | 0.0009 | 0.0000 | Krt82         |
| 0 | 2 | 1 | 0  | 0  | 9   | 2  | 0  | 0.0000 | 0.0013 | 0.0006 | 0.0000 | Nasp          |
| 1 | 0 | 0 | 0  | 1  | 0   | 0  | 0  | 0.0008 | 0.0000 | 0.0000 | 0.0000 | Srrt          |
| 0 | 1 | 0 | 3  | 0  | 1   | 0  | 4  | 0.0000 | 0.0001 | 0.0000 | 0.0011 | Rtn4          |
| 0 | 8 | 6 | 11 | 0  | 34  | 20 | 20 | 0.0000 | 0.0048 | 0.0057 | 0.0056 | Rrbp1         |
| 0 | 0 | 0 | 1  | 0  | 0   | 0  | 3  | 0.0000 | 0.0000 | 0.0000 | 0.0008 | Krt23         |
| 1 | 2 | 0 | 4  | 2  | 5   | 0  | 8  | 0.0015 | 0.0007 | 0.0000 | 0.0023 | Arhgdia       |
| 0 | 1 | 1 | 2  | 0  | 2   | 4  | 3  | 0.0000 | 0.0003 | 0.0011 | 0.0008 | 2210010C04Rik |
| 1 | 1 | 0 | 0  | 2  | 2   | 0  | 0  | 0.0015 | 0.0003 | 0.0000 | 0.0000 | Cox6c         |
| 0 | 0 | 0 | 1  | 0  | 0   | 0  | 1  | 0.0000 | 0.0000 | 0.0000 | 0.0003 | Cenpq         |
| 0 | 1 | 2 | 3  | 0  | 5   | 11 | 7  | 0.0000 | 0.0007 | 0.0031 | 0.0020 | Rpl17         |
| 0 | 0 | 1 | 0  | 0  | 0   | 2  | 0  | 0.0000 | 0.0000 | 0.0006 | 0.0000 | Glod4         |
| 0 | 0 | 1 | 0  | 0  | 0   | 2  | 0  | 0.0000 | 0.0000 | 0.0006 | 0.0000 | Arpc5         |
| 0 | 5 | 2 | 5  | 0  | 61  | 14 | 11 | 0.0000 | 0.0086 | 0.0040 | 0.0031 | Cela3b        |
| 0 | 0 | 0 | 1  | 0  | 0   | 0  | 1  | 0.0000 | 0.0000 | 0.0000 | 0.0003 | Mtap          |
| 0 | 4 | 0 | 0  | 0  | 18  | 0  | 0  | 0.0000 | 0.0025 | 0.0000 | 0.0000 | Clps          |
| 0 | 0 | 0 | 1  | 0  | 0   | 0  | 1  | 0.0000 | 0.0000 | 0.0000 | 0.0003 | Pcyox1        |
| 0 | 1 | 0 | 0  | 0  | 1   | 0  | 0  | 0.0000 | 0.0001 | 0.0000 | 0.0000 | Cott1         |
| 0 | 0 | 1 | 0  | 0  | 0   | 1  | 0  | 0.0000 | 0.0000 | 0.0003 | 0.0000 | Atp5f1        |
| 0 | 2 | 3 | 2  | 0  | 16  | 13 | 2  | 0.0000 | 0.0023 | 0.0037 | 0.0006 | Rps21         |
| 1 | 5 | 3 | 7  | 2  | 41  | 12 | 17 | 0.0015 | 0.0058 | 0.0034 | 0.0048 | Ywhab         |
| 2 | 8 | 2 | 4  | 21 | 233 | 9  | 14 | 0.0162 | 0.0328 | 0.0026 | 0.0039 | Ctrb1         |
| 0 | 2 | 2 | 3  | 0  | 15  | 11 | 8  | 0.0000 | 0.0021 | 0.0031 | 0.0023 | Rpl14         |
| 0 | 1 | 2 | 7  | 0  | 2   | 4  | 11 | 0.0000 | 0.0003 | 0.0011 | 0.0031 | Tppp3         |
| 1 | 1 | 0 | 0  | 2  | 1   | 0  | 0  | 0.0015 | 0.0001 | 0.0000 | 0.0000 | Filip1        |
| 0 | 3 | 1 | 5  | 0  | 6   | 11 | 14 | 0.0000 | 0.0008 | 0.0031 | 0.0039 | Tubb2b        |
| 0 | 1 | 0 | 0  | 0  | 2   | 0  | 0  | 0.0000 | 0.0003 | 0.0000 | 0.0000 | Rbm8a         |
| 0 | 0 | 0 | 1  | 0  | 0   | 0  | 2  | 0.0000 | 0.0000 | 0.0000 | 0.0006 | Cygb          |
| 0 | 0 | 0 | 1  | 0  | 0   | 0  | 2  | 0.0000 | 0.0000 | 0.0000 | 0.0006 | Hnmpa0        |
| 0 | 1 | 0 | 1  | 0  | 1   | 0  | 1  | 0.0000 | 0.0001 | 0.0000 | 0.0003 | Rpl11         |
| 1 | 2 | 1 | 2  | 2  | 5   | 11 | 4  | 0.0015 | 0.0007 | 0.0031 | 0.0011 | Ssr1          |
| 1 | 2 | 0 | 2  | 1  | 8   | 0  | 4  | 0.0008 | 0.0011 | 0.0000 | 0.0011 | Serbp1        |
| 0 | 0 | 1 | 1  | 0  | 0   | 1  | 1  | 0.0000 | 0.0000 | 0.0003 | 0.0003 | Tpd52l2       |
| 0 | 0 | 1 | 0  | 0  | 0   | 1  | 0  | 0.0000 | 0.0000 | 0.0003 | 0.0000 | Uqcrc1        |
| 0 | 0 | 0 | 1  | 0  | 0   | 0  | 1  | 0.0000 | 0.0000 | 0.0000 | 0.0003 | Cmtm6         |
| 0 | 0 | 1 | 0  | 0  | 0   | 1  | 0  | 0.0000 | 0.0000 | 0.0003 | 0.0000 | Rpl15         |
| 0 | 1 | 0 | 0  | 0  | 1   | 0  | 0  | 0.0000 | 0.0001 | 0.0000 | 0.0000 | Shmt2         |
| 2 | 4 | 1 | 3  | 8  | 19  | 4  | 4  | 0.0062 | 0.0027 | 0.0011 | 0.0011 | Rps19         |
| 0 | 0 | 1 | 0  | 0  | 0   | 1  | 0  | 0.0000 | 0.0000 | 0.0003 | 0.0000 | Pdhb          |
| 0 | 1 | 1 | 1  | 0  | 1   | 3  | 2  | 0.0000 | 0.0001 | 0.0009 | 0.0006 | Hnmpm         |
| 0 | 1 | 1 | 0  | 0  | 1   | 1  | 0  | 0.0000 | 0.0001 | 0.0003 | 0.0000 | Pgm1          |
| 1 | 1 | 1 | 1  | 2  | 15  | 9  | 5  | 0.0015 | 0.0021 | 0.0026 | 0.0014 | Ptms          |
| 0 | 1 | 0 | 0  | 0  | 2   | 0  | 0  | 0.0000 | 0.0003 | 0.0000 | 0.0000 | Oxct1         |

|   |   |   |   |   |    |    |    |        |        |        |        |          |
|---|---|---|---|---|----|----|----|--------|--------|--------|--------|----------|
| 0 | 0 | 1 | 0 | 0 | 0  | 1  | 0  | 0.0000 | 0.0000 | 0.0003 | 0.0000 | Nhp211   |
| 0 | 2 | 0 | 3 | 0 | 4  | 0  | 4  | 0.0000 | 0.0006 | 0.0000 | 0.0011 | Tmed10   |
| 0 | 1 | 0 | 0 | 0 | 2  | 0  | 0  | 0.0000 | 0.0003 | 0.0000 | 0.0000 | Cthrc1   |
| 0 | 1 | 1 | 0 | 0 | 1  | 2  | 0  | 0.0000 | 0.0001 | 0.0006 | 0.0000 | Sarp     |
| 0 | 0 | 1 | 0 | 0 | 0  | 2  | 0  | 0.0000 | 0.0000 | 0.0006 | 0.0000 | Sec13    |
| 0 | 1 | 1 | 1 | 0 | 5  | 3  | 1  | 0.0000 | 0.0007 | 0.0009 | 0.0003 | Rpl34    |
| 0 | 0 | 0 | 1 | 0 | 0  | 0  | 2  | 0.0000 | 0.0000 | 0.0000 | 0.0006 | Fam114a1 |
| 0 | 1 | 1 | 1 | 0 | 2  | 6  | 2  | 0.0000 | 0.0003 | 0.0017 | 0.0006 | Ube2v2   |
| 0 | 1 | 0 | 0 | 0 | 1  | 0  | 0  | 0.0000 | 0.0001 | 0.0000 | 0.0000 | Acp1     |
| 1 | 2 | 1 | 0 | 9 | 8  | 1  | 0  | 0.0069 | 0.0011 | 0.0003 | 0.0000 | Atp5d    |
| 0 | 0 | 0 | 1 | 0 | 0  | 0  | 1  | 0.0000 | 0.0000 | 0.0000 | 0.0003 | Sec23b   |
| 0 | 1 | 0 | 0 | 0 | 1  | 0  | 0  | 0.0000 | 0.0001 | 0.0000 | 0.0000 | Drap1    |
| 0 | 0 | 1 | 1 | 0 | 0  | 3  | 1  | 0.0000 | 0.0000 | 0.0009 | 0.0003 | Mrpl2    |
| 0 | 1 | 1 | 1 | 0 | 3  | 5  | 1  | 0.0000 | 0.0004 | 0.0014 | 0.0003 | Chmp4b   |
| 0 | 0 | 1 | 1 | 0 | 0  | 4  | 2  | 0.0000 | 0.0000 | 0.0011 | 0.0000 | Rpl4     |
| 0 | 1 | 3 | 1 | 0 | 2  | 10 | 2  | 0.0000 | 0.0003 | 0.0028 | 0.0006 | Eef1g    |
| 0 | 1 | 1 | 0 | 0 | 4  | 2  | 0  | 0.0000 | 0.0006 | 0.0006 | 0.0000 | C1qtnf2  |
| 0 | 1 | 0 | 0 | 0 | 1  | 0  | 0  | 0.0000 | 0.0001 | 0.0000 | 0.0000 | Phpt1    |
| 0 | 2 | 0 | 0 | 0 | 5  | 0  | 0  | 0.0000 | 0.0007 | 0.0000 | 0.0000 | Cnn3     |
| 1 | 1 | 1 | 0 | 1 | 2  | 1  | 0  | 0.0008 | 0.0003 | 0.0003 | 0.0000 | Uqcrc2   |
| 0 | 0 | 1 | 0 | 0 | 0  | 1  | 0  | 0.0000 | 0.0000 | 0.0003 | 0.0000 | Plin3    |
| 1 | 0 | 0 | 1 | 3 | 0  | 0  | 2  | 0.0023 | 0.0000 | 0.0000 | 0.0006 | Rpn2     |
| 2 | 5 | 3 | 3 | 5 | 23 | 6  | 6  | 0.0039 | 0.0032 | 0.0017 | 0.0017 | Pgam1    |
| 0 | 0 | 1 | 0 | 0 | 0  | 1  | 0  | 0.0000 | 0.0000 | 0.0003 | 0.0000 | Cmpk1    |
| 0 | 0 | 0 | 1 | 0 | 0  | 0  | 1  | 0.0000 | 0.0000 | 0.0000 | 0.0003 | Ikbip    |
| 0 | 1 | 0 | 0 | 0 | 2  | 0  | 0  | 0.0000 | 0.0003 | 0.0000 | 0.0000 | Abcb6    |
| 0 | 0 | 1 | 1 | 0 | 0  | 5  | 1  | 0.0000 | 0.0000 | 0.0014 | 0.0003 | Pgd      |
| 0 | 0 | 0 | 1 | 0 | 0  | 0  | 2  | 0.0000 | 0.0000 | 0.0000 | 0.0006 | Ssr3     |
| 0 | 0 | 0 | 1 | 0 | 0  | 0  | 2  | 0.0000 | 0.0000 | 0.0000 | 0.0006 | Paics    |
| 0 | 1 | 3 | 4 | 0 | 2  | 13 | 8  | 0.0000 | 0.0003 | 0.0037 | 0.0023 | Cyb5r3   |
| 0 | 1 | 1 | 0 | 0 | 2  | 1  | 0  | 0.0000 | 0.0003 | 0.0003 | 0.0000 | Aspdh    |
| 0 | 0 | 0 | 3 | 0 | 0  | 0  | 6  | 0.0000 | 0.0000 | 0.0000 | 0.0017 | Krt7     |
| 0 | 2 | 3 | 2 | 0 | 5  | 8  | 2  | 0.0000 | 0.0007 | 0.0023 | 0.0006 | Etfb     |
| 0 | 0 | 1 | 0 | 0 | 0  | 8  | 0  | 0.0000 | 0.0000 | 0.0023 | 0.0000 | Atp5h    |
| 0 | 1 | 0 | 0 | 0 | 2  | 0  | 0  | 0.0000 | 0.0003 | 0.0000 | 0.0000 | Fgf23    |
| 1 | 3 | 1 | 3 | 4 | 19 | 2  | 5  | 0.0031 | 0.0027 | 0.0006 | 0.0014 | Set      |
| 0 | 1 | 1 | 5 | 0 | 4  | 4  | 10 | 0.0000 | 0.0006 | 0.0011 | 0.0028 | Ctrl     |
| 0 | 0 | 1 | 2 | 0 | 0  | 1  | 5  | 0.0000 | 0.0000 | 0.0003 | 0.0014 | Gsdma    |
| 0 | 1 | 1 | 0 | 0 | 2  | 4  | 0  | 0.0000 | 0.0003 | 0.0011 | 0.0000 | Anp32b   |
| 0 | 0 | 0 | 1 | 0 | 0  | 0  | 1  | 0.0000 | 0.0000 | 0.0000 | 0.0003 | Tmod3    |
| 0 | 0 | 0 | 1 | 0 | 0  | 0  | 1  | 0.0000 | 0.0000 | 0.0000 | 0.0003 | Dync1h1  |
| 1 | 0 | 0 | 0 | 1 | 0  | 0  | 0  | 0.0008 | 0.0000 | 0.0000 | 0.0000 | Isyna1   |
| 0 | 2 | 1 | 1 | 0 | 3  | 2  | 1  | 0.0000 | 0.0004 | 0.0006 | 0.0003 | Akr1a1   |
| 0 | 1 | 0 | 0 | 0 | 1  | 0  | 0  | 0.0000 | 0.0001 | 0.0000 | 0.0000 | Ralb     |
| 0 | 1 | 0 | 0 | 0 | 1  | 0  | 0  | 0.0000 | 0.0001 | 0.0000 | 0.0000 | Caln1    |
| 0 | 1 | 1 | 1 | 0 | 9  | 3  | 1  | 0.0000 | 0.0013 | 0.0009 | 0.0003 | Sh3bgr1  |
| 0 | 1 | 1 | 1 | 0 | 2  | 6  | 1  | 0.0000 | 0.0003 | 0.0017 | 0.0003 | Refbp2   |
| 0 | 1 | 0 | 0 | 0 | 1  | 0  | 0  | 0.0000 | 0.0001 | 0.0000 | 0.0000 | Myg1     |
| 0 | 1 | 0 | 0 | 0 | 2  | 0  | 0  | 0.0000 | 0.0003 | 0.0000 | 0.0000 | Serpini2 |
| 0 | 1 | 0 | 0 | 0 | 3  | 0  | 0  | 0.0000 | 0.0004 | 0.0000 | 0.0000 | Aldh9a1  |
| 0 | 0 | 1 | 0 | 0 | 0  | 1  | 0  | 0.0000 | 0.0000 | 0.0003 | 0.0000 | Klra17   |
| 0 | 0 | 1 | 0 | 0 | 0  | 1  | 0  | 0.0000 | 0.0000 | 0.0003 | 0.0000 | Hdgfrp3  |
| 0 | 1 | 2 | 1 | 0 | 1  | 7  | 2  | 0.0000 | 0.0001 | 0.0020 | 0.0006 | Rhoa     |
| 0 | 0 | 1 | 1 | 0 | 0  | 6  | 3  | 0.0000 | 0.0000 | 0.0017 | 0.0008 | Psma6    |
| 0 | 0 | 1 | 0 | 0 | 0  | 1  | 0  | 0.0000 | 0.0000 | 0.0003 | 0.0000 | Kif21b   |
| 0 | 0 | 1 | 0 | 0 | 0  | 1  | 0  | 0.0000 | 0.0000 | 0.0003 | 0.0000 | Plec     |
| 0 | 1 | 0 | 1 | 0 | 3  | 0  | 2  | 0.0000 | 0.0004 | 0.0000 | 0.0006 | Cnpy2    |
| 0 | 0 | 0 | 1 | 0 | 0  | 0  | 1  | 0.0000 | 0.0000 | 0.0000 | 0.0003 | Clic4    |
| 0 | 0 | 0 | 3 | 0 | 0  | 0  | 5  | 0.0000 | 0.0000 | 0.0000 | 0.0014 | Add3     |
| 0 | 0 | 2 | 2 | 0 | 0  | 5  | 4  | 0.0000 | 0.0000 | 0.0014 | 0.0011 | Add1     |
| 0 | 1 | 0 | 0 | 0 | 1  | 0  | 0  | 0.0000 | 0.0001 | 0.0000 | 0.0000 | Eif3i    |
| 0 | 1 | 0 | 0 | 0 | 1  | 0  | 0  | 0.0000 | 0.0001 | 0.0000 | 0.0000 | Galk1    |
| 0 | 0 | 1 | 0 | 0 | 0  | 1  | 0  | 0.0000 | 0.0000 | 0.0003 | 0.0000 | Esd      |
| 0 | 0 | 0 | 4 | 0 | 0  | 0  | 7  | 0.0000 | 0.0000 | 0.0000 | 0.0020 | Dstn     |
| 0 | 1 | 0 | 0 | 0 | 1  | 0  | 0  | 0.0000 | 0.0001 | 0.0000 | 0.0000 | Sec11a   |
| 1 | 2 | 1 | 1 | 1 | 7  | 2  | 2  | 0.0008 | 0.0010 | 0.0006 | 0.0006 | Tmed2    |
| 0 | 0 | 0 | 2 | 0 | 0  | 0  | 3  | 0.0000 | 0.0000 | 0.0000 | 0.0008 | Try4     |
| 0 | 1 | 1 | 1 | 0 | 5  | 3  | 1  | 0.0000 | 0.0007 | 0.0009 | 0.0003 | Ikbke    |
| 0 | 0 | 0 | 1 | 0 | 0  | 0  | 1  | 0.0000 | 0.0000 | 0.0000 | 0.0003 | Ak1      |
| 0 | 2 | 0 | 0 | 0 | 4  | 0  | 0  | 0.0000 | 0.0006 | 0.0000 | 0.0000 | Psma4    |
| 0 | 1 | 1 | 1 | 0 | 4  | 3  | 2  | 0.0000 | 0.0006 | 0.0009 | 0.0006 | Psmb2    |

|   |   |   |    |   |    |    |    |        |        |        |        |        |
|---|---|---|----|---|----|----|----|--------|--------|--------|--------|--------|
| 0 | 2 | 1 | 0  | 0 | 5  | 1  | 0  | 0.0000 | 0.0007 | 0.0003 | 0.0000 | Psma1  |
| 0 | 0 | 0 | 1  | 0 | 0  | 0  | 1  | 0.0000 | 0.0000 | 0.0000 | 0.0003 | Arntl  |
| 0 | 2 | 0 | 0  | 0 | 7  | 0  | 0  | 0.0000 | 0.0010 | 0.0000 | 0.0000 | Ak2    |
| 0 | 8 | 9 | 10 | 0 | 52 | 36 | 14 | 0.0000 | 0.0073 | 0.0102 | 0.0039 | Akap12 |
| 0 | 1 | 1 | 0  | 0 | 5  | 4  | 0  | 0.0000 | 0.0007 | 0.0011 | 0.0000 | Skp1   |
| 0 | 0 | 0 | 1  | 0 | 0  | 0  | 2  | 0.0000 | 0.0000 | 0.0000 | 0.0006 | Eif4h  |
| 0 | 0 | 0 | 1  | 0 | 0  | 0  | 1  | 0.0000 | 0.0000 | 0.0000 | 0.0003 | Coro1c |
| 0 | 1 | 0 | 0  | 0 | 3  | 0  | 0  | 0.0000 | 0.0004 | 0.0000 | 0.0000 | Ctsz   |
| 0 | 0 | 1 | 1  | 0 | 0  | 5  | 1  | 0.0000 | 0.0000 | 0.0014 | 0.0003 | Snx1   |
| 0 | 2 | 2 | 5  | 0 | 10 | 7  | 15 | 0.0000 | 0.0014 | 0.0020 | 0.0042 | Tagln2 |
| 0 | 0 | 0 | 2  | 0 | 0  | 0  | 3  | 0.0000 | 0.0000 | 0.0000 | 0.0008 | Ehd1   |
| 0 | 0 | 0 | 2  | 0 | 0  | 0  | 3  | 0.0000 | 0.0000 | 0.0000 | 0.0008 | Gbp2   |
| 0 | 2 | 0 | 1  | 0 | 2  | 0  | 1  | 0.0000 | 0.0003 | 0.0000 | 0.0003 | Aifm1  |
| 1 | 1 | 0 | 0  | 1 | 2  | 0  | 0  | 0.0008 | 0.0003 | 0.0000 | 0.0000 | Ddx39b |
| 0 | 2 | 1 | 1  | 0 | 3  | 4  | 1  | 0.0000 | 0.0004 | 0.0011 | 0.0003 | Clic1  |
| 0 | 1 | 1 | 0  | 0 | 3  | 3  | 0  | 0.0000 | 0.0004 | 0.0009 | 0.0000 | Vars   |
| 0 | 1 | 0 | 1  | 0 | 2  | 0  | 5  | 0.0000 | 0.0003 | 0.0000 | 0.0014 | Prss1  |
| 0 | 1 | 0 | 0  | 0 | 2  | 0  | 0  | 0.0000 | 0.0003 | 0.0000 | 0.0000 | Thbs4  |
| 0 | 1 | 0 | 0  | 0 | 2  | 0  | 0  | 0.0000 | 0.0003 | 0.0000 | 0.0000 | Strap  |
| 0 | 4 | 0 | 2  | 0 | 6  | 0  | 2  | 0.0000 | 0.0008 | 0.0000 | 0.0006 | Hnmpc  |
| 0 | 0 | 1 | 0  | 0 | 0  | 2  | 0  | 0.0000 | 0.0000 | 0.0006 | 0.0000 | Pmm2   |
| 0 | 2 | 2 | 2  | 0 | 6  | 9  | 6  | 0.0000 | 0.0008 | 0.0026 | 0.0017 | Psma7  |
| 0 | 0 | 0 | 1  | 0 | 0  | 0  | 2  | 0.0000 | 0.0000 | 0.0000 | 0.0006 | Psma5  |
| 0 | 0 | 1 | 0  | 0 | 0  | 1  | 0  | 0.0000 | 0.0000 | 0.0003 | 0.0000 | Dnpep  |
| 0 | 1 | 0 | 1  | 0 | 4  | 0  | 1  | 0.0000 | 0.0006 | 0.0000 | 0.0003 | Hnmpf  |

| protein | annotation                                                                                    | FDR   |       |      |      | Unique Petides |       |    |  |
|---------|-----------------------------------------------------------------------------------------------|-------|-------|------|------|----------------|-------|----|--|
|         |                                                                                               | e15.5 | e17.5 | p2   | p14  | e15.5          | e17.5 | p2 |  |
| E9Q447  | Uncharacterized protein OS=Mus musculus GN=Spna2 PE=4 SV=1                                    | 1.00  | 0.00  | 0.00 | 0.00 | 0              | 3     | 8  |  |
| O08547  | Vesicle-trafficking protein SEC22b OS=Mus musculus GN=Sec22b PE=1 SV=3                        | 1.00  | 1.00  | 1.00 | 0.02 | 0              | 0     | 0  |  |
| O35074  | Prostacyclin synthase OS=Mus musculus GN=Ptgis PE=2 SV=1                                      | 1.00  | 1.00  | 1.00 | 0.00 | 0              | 0     | 0  |  |
| O35129  | Prohibitin-2 OS=Mus musculus GN=Phb2 PE=1 SV=1                                                | 1.00  | 0.02  | 0.02 | 1.00 | 0              | 1     | 1  |  |
| O35682  | Myeloid-associated differentiation marker OS=Mus musculus GN=Myadm PE=2 SV=2                  | 1.00  | 1.00  | 1.00 | 0.02 | 0              | 0     | 0  |  |
| O54734  | Dolichyl-diphosphooligosaccharide--protein glycosyltransferase 48 kDa subunit OS=Mus musculus | 1.00  | 0.02  | 1.00 | 0.00 | 0              | 1     | 0  |  |
| O55022  | Membrane-associated progesterone receptor component 1 OS=Mus musculus GN=Pgrmc1 PE=           | 1.00  | 0.02  | 1.00 | 1.00 | 0              | 1     | 0  |  |
| O55026  | Ectonucleoside triphosphate diphosphohydrolase 2 OS=Mus musculus GN=Entpd2 PE=1 SV=2          | 1.00  | 1.00  | 1.00 | 0.00 | 0              | 0     | 0  |  |
| O55029  | Coatomer subunit beta' OS=Mus musculus GN=Copb2 PE=2 SV=2                                     | 1.00  | 1.00  | 1.00 | 0.02 | 0              | 0     | 0  |  |
| O88962  | 7-alpha-hydroxycholest-4-en-3-one 12-alpha-hydroxylase OS=Mus musculus GN=Cyp8b1 PE=2         | 1.00  | 1.00  | 1.00 | 0.07 | 0              | 0     | 0  |  |
| P05064  | Fructose-bisphosphate aldolase A OS=Mus musculus GN=Aldoa PE=1 SV=2                           | 0.02  | 0.00  | 0.00 | 0.00 | 1              | 9     | 4  |  |
| P11688  | Integrin alpha-5 OS=Mus musculus GN=Itga5 PE=1 SV=3                                           | 1.00  | 0.04  | 0.02 | 1.00 | 0              | 1     | 1  |  |
| P14431  | H-2 class I histocompatibility antigen, Q9 alpha chain (Fragment) OS=Mus musculus GN=H2-Q9    | 1.00  | 0.04  | 1.00 | 1.00 | 0              | 1     | 0  |  |
| P14733  | Lamin-B1 OS=Mus musculus GN=Lmnb1 PE=1 SV=3                                                   | 0.00  | 0.00  | 0.00 | 0.00 | 2              | 5     | 5  |  |
| P21981  | Protein-glutamine gamma-glutamyltransferase 2 OS=Mus musculus GN=Tgm2 PE=1 SV=4               | 1.00  | 1.00  | 1.00 | 0.00 | 0              | 0     | 0  |  |
| P26645  | Myristoylated alanine-rich C-kinase substrate OS=Mus musculus GN=Marcks PE=1 SV=2             | 0.00  | 0.00  | 0.00 | 0.00 | 5              | 6     | 4  |  |
| P35564  | Calnexin OS=Mus musculus GN=Canx PE=1 SV=1                                                    | 1.00  | 0.00  | 1.00 | 0.00 | 0              | 2     | 0  |  |
| P45878  | Peptidyl-prolyl cis-trans isomerase FKBP2 OS=Mus musculus GN=Fkbp2 PE=1 SV=1                  | 1.00  | 0.02  | 1.00 | 1.00 | 0              | 1     | 0  |  |
| P47740  | Fatty aldehyde dehydrogenase OS=Mus musculus GN=Aldh3a2 PE=2 SV=2                             | 1.00  | 1.00  | 1.00 | 0.02 | 0              | 0     | 0  |  |
| P47753  | F-actin-capping protein subunit alpha-1 OS=Mus musculus GN=Capza1 PE=1 SV=4                   | 1.00  | 0.02  | 0.02 | 0.02 | 0              | 1     | 1  |  |
| P47757  | F-actin-capping protein subunit beta OS=Mus musculus GN=Capzb PE=1 SV=3                       | 1.00  | 0.03  | 0.03 | 0.02 | 0              | 1     | 1  |  |
| P48771  | Cytochrome c oxidase subunit 7A2, mitochondrial OS=Mus musculus GN=Cox7a2 PE=1 SV=2           | 1.00  | 0.02  | 1.00 | 1.00 | 0              | 1     | 0  |  |
| P56395  | Cytochrome b5 OS=Mus musculus GN=Cyb5a PE=1 SV=2                                              | 1.00  | 1.00  | 1.00 | 0.02 | 0              | 0     | 0  |  |
| P56501  | Mitochondrial uncoupling protein 3 OS=Mus musculus GN=Ucp3 PE=2 SV=1                          | 0.05  | 0.03  | 1.00 | 0.08 | 1              | 1     | 0  |  |
| P61168  | D(2) dopamine receptor OS=Mus musculus GN=Drd2 PE=2 SV=2                                      | 0.04  | 0.03  | 1.00 | 1.00 | 1              | 1     | 0  |  |
| P61804  | Dolichyl-diphosphooligosaccharide--protein glycosyltransferase subunit DAD1 OS=Mus musculus   | 1.00  | 0.03  | 1.00 | 0.00 | 0              | 1     | 0  |  |
| P63005  | Platelet-activating factor acetylhydrolase IB subunit alpha OS=Mus musculus GN=Pafah1b1 PE=   | 1.00  | 1.00  | 0.02 | 1.00 | 0              | 0     | 1  |  |
| P63242  | Eukaryotic translation initiation factor 5A-1 OS=Mus musculus GN=Elf5a PE=1 SV=2              | 0.02  | 0.00  | 0.04 | 0.00 | 1              | 2     | 1  |  |
| P67778  | Prohibitin OS=Mus musculus GN=Phb PE=1 SV=1                                                   | 1.00  | 1.00  | 0.02 | 1.00 | 0              | 0     | 1  |  |
| P70441  | Na(+)/H(+) exchange regulatory cofactor NHE-RF1 OS=Mus musculus GN=Slc9a3r1 PE=1 SV=3         | 1.00  | 1.00  | 0.02 | 0.00 | 0              | 0     | 1  |  |
| P97449  | Aminopeptidase N OS=Mus musculus GN=Anpep PE=1 SV=4                                           | 1.00  | 1.00  | 0.03 | 0.00 | 0              | 0     | 1  |  |
| P97450  | ATP synthase-coupling factor 6, mitochondrial OS=Mus musculus GN=Atp5j PE=1 SV=1              | 1.00  | 0.04  | 1.00 | 1.00 | 0              | 1     | 0  |  |
| Q02257  | Junction plakoglobin OS=Mus musculus GN=Jup PE=1 SV=3                                         | 1.00  | 1.00  | 1.00 | 0.00 | 0              | 0     | 0  |  |
| Q05144  | Ras-related C3 botulinum toxin substrate 2 OS=Mus musculus GN=Rac2 PE=2 SV=1                  | 1.00  | 1.00  | 0.02 | 0.02 | 0              | 0     | 1  |  |
| Q06185  | ATP synthase subunit e, mitochondrial OS=Mus musculus GN=Atp5i PE=1 SV=2                      | 1.00  | 0.02  | 0.02 | 1.00 | 0              | 1     | 1  |  |
| Q07113  | Cation-independent mannose-6-phosphate receptor OS=Mus musculus GN=Igf2r PE=1 SV=1            | 0.02  | 0.00  | 0.00 | 1.00 | 1              | 8     | 4  |  |
| Q09163  | Protein delta homolog 1 OS=Mus musculus GN=Dlk1 PE=1 SV=1                                     | 1.00  | 0.04  | 1.00 | 1.00 | 0              | 1     | 0  |  |
| Q3U7R1  | Extended synaptotagmin-1 OS=Mus musculus GN=Esyt1 PE=2 SV=2                                   | 1.00  | 1.00  | 1.00 | 0.03 | 0              | 0     | 0  |  |
| Q5F4T0  | Transient receptor potential cation channel, subfamily M, member 3 OS=Mus musculus GN=Trpr    | 1.00  | 0.02  | 1.00 | 1.00 | 0              | 1     | 0  |  |
| Q5XJY5  | Coatomer subunit delta OS=Mus musculus GN=Arcn1 PE=2 SV=2                                     | 1.00  | 1.00  | 1.00 | 0.02 | 0              | 0     | 0  |  |
| Q60870  | Receptor expression-enhancing protein 5 OS=Mus musculus GN=Reep5 PE=1 SV=1                    | 1.00  | 1.00  | 0.02 | 1.00 | 0              | 0     | 1  |  |
| Q60931  | Voltage-dependent anion-selective channel protein 3 OS=Mus musculus GN=Vdac3 PE=1 SV=1        | 1.00  | 1.00  | 1.00 | 0.07 | 0              | 0     | 0  |  |
| Q60932  | Voltage-dependent anion-selective channel protein 1 OS=Mus musculus GN=Vdac1 PE=1 SV=3        | 1.00  | 0.00  | 0.00 | 0.00 | 0              | 2     | 3  |  |
| Q60997  | Deleted in malignant brain tumors 1 protein OS=Mus musculus GN=Dmbt1 PE=1 SV=2                | 1.00  | 1.00  | 0.00 | 1.00 | 0              | 0     | 2  |  |
| Q61029  | Lamina-associated polypeptide 2, isoforms beta/delta/epsilon/gamma OS=Mus musculus GN=Trr     | 1.00  | 0.02  | 0.00 | 0.00 | 0              | 1     | 2  |  |
| Q61409  | cGMP-inhibited 3',5'-cyclic phosphodiesterase B OS=Mus musculus GN=Pde3b PE=1 SV=2            | 1.00  | 0.02  | 1.00 | 1.00 | 0              | 1     | 0  |  |
| Q61598  | Rab GDP dissociation inhibitor beta OS=Mus musculus GN=Gdi2 PE=1 SV=1                         | 1.00  | 1.00  | 1.00 | 0.02 | 0              | 0     | 0  |  |
| Q62261  | Spectrin beta chain, brain 1 OS=Mus musculus GN=Sptbn1 PE=1 SV=2                              | 1.00  | 0.05  | 0.00 | 0.00 | 0              | 1     | 8  |  |
| Q63836  | Selenium-binding protein 2 OS=Mus musculus GN=Selenbp2 PE=1 SV=2                              | 1.00  | 0.02  | 0.02 | 0.02 | 0              | 1     | 1  |  |
| Q640L3  | Cell cycle progression protein 1 OS=Mus musculus GN=Ccpg1 PE=1 SV=2                           | 1.00  | 0.04  | 1.00 | 1.00 | 0              | 1     | 0  |  |
| Q64314  | Hematopoietic progenitor cell antigen CD34 OS=Mus musculus GN=Cd34 PE=1 SV=1                  | 1.00  | 0.07  | 1.00 | 1.00 | 0              | 1     | 0  |  |
| Q68FD5  | Clathrin heavy chain 1 OS=Mus musculus GN=Cltc PE=1 SV=3                                      | 1.00  | 1.00  | 1.00 | 0.00 | 0              | 0     | 0  |  |
| Q80TN7  | Neuron navigator 3 OS=Mus musculus GN=Nav3 PE=1 SV=2                                          | 0.04  | 1.00  | 1.00 | 1.00 | 1              | 0     | 0  |  |
| Q80WJ7  | Protein LYRIC OS=Mus musculus GN=Mtdh PE=1 SV=1                                               | 1.00  | 1.00  | 0.05 | 1.00 | 0              | 0     | 1  |  |
| Q8BH64  | EH domain-containing protein 2 OS=Mus musculus GN=Ehd2 PE=1 SV=1                              | 1.00  | 1.00  | 1.00 | 0.00 | 0              | 0     | 0  |  |
| Q8BSY0  | Aspartyl/asparaginyl beta-hydroxylase OS=Mus musculus GN=Asph PE=2 SV=1                       | 1.00  | 1.00  | 1.00 | 0.02 | 0              | 0     | 0  |  |
| Q8BUE4  | Apoptosis-inducing factor 2 OS=Mus musculus GN=Aifm2 PE=2 SV=1                                | 1.00  | 1.00  | 0.05 | 0.02 | 0              | 0     | 1  |  |
| Q8CIE6  | Coatomer subunit alpha OS=Mus musculus GN=Copa PE=1 SV=2                                      | 1.00  | 1.00  | 1.00 | 0.02 | 0              | 0     | 0  |  |
| Q8K2B3  | Succinate dehydrogenase [ubiquinone] flavoprotein subunit, mitochondrial OS=Mus musculus GN   | 0.03  | 0.02  | 0.02 | 0.02 | 1              | 1     | 1  |  |
| Q8R207  | Small subunit of serine palmitoyltransferase A OS=Mus musculus GN=Ssspta PE=2 SV=2            | 1.00  | 0.02  | 0.02 | 0.02 | 0              | 1     | 1  |  |
| Q91YQ5  | Dolichyl-diphosphooligosaccharide--protein glycosyltransferase subunit 1 OS=Mus musculus GN   | 1.00  | 0.04  | 0.03 | 0.00 | 0              | 1     | 1  |  |
| Q99JP7  | Gamma-glutamyltransferase 7 OS=Mus musculus GN=Ggt7 PE=1 SV=2                                 | 1.00  | 0.07  | 1.00 | 1.00 | 0              | 1     | 0  |  |
| Q99KF1  | Transmembrane emp24 domain-containing protein 9 OS=Mus musculus GN=Tmed9 PE=2 SV=2            | 1.00  | 0.00  | 0.02 | 0.00 | 0              | 2     | 1  |  |
| Q99KJ8  | Dynactin subunit 2 OS=Mus musculus GN=Dctn2 PE=1 SV=3                                         | 1.00  | 1.00  | 1.00 | 0.02 | 0              | 0     | 0  |  |
| Q99PL5  | Ribosome-binding protein 1 OS=Mus musculus GN=Rrbp1 PE=2 SV=2                                 | 1.00  | 0.00  | 0.00 | 0.00 | 0              | 8     | 6  |  |
| Q9CPQ1  | Cytochrome c oxidase subunit 6C OS=Mus musculus GN=Cox6c PE=1 SV=3                            | 0.04  | 0.02  | 1.00 | 1.00 | 1              | 1     | 0  |  |
| Q9CQQ7  | ATP synthase subunit b, mitochondrial OS=Mus musculus GN=Atp5f1 PE=1 SV=1                     | 1.00  | 1.00  | 0.05 | 1.00 | 0              | 0     | 1  |  |
| Q9CY50  | Translocon-associated protein subunit alpha OS=Mus musculus GN=Ssr1 PE=1 SV=1                 | 0.06  | 0.00  | 0.02 | 0.00 | 1              | 2     | 1  |  |
| Q9CZ13  | Cytochrome b-c1 complex subunit 1, mitochondrial OS=Mus musculus GN=Uqcrc1 PE=1 SV=2          | 1.00  | 1.00  | 0.02 | 1.00 | 0              | 0     | 1  |  |
| Q9CZ69  | CKLF-like MARVEL transmembrane domain-containing protein 6 OS=Mus musculus GN=Cmtm6           | 1.00  | 1.00  | 1.00 | 0.04 | 0              | 0     | 0  |  |
| Q9D1M0  | Protein SEC13 homolog OS=Mus musculus GN=Sec13 PE=2 SV=3                                      | 1.00  | 1.00  | 0.02 | 1.00 | 0              | 0     | 1  |  |
| Q9D3D9  | ATP synthase subunit delta, mitochondrial OS=Mus musculus GN=Atp5d PE=1 SV=1                  | 0.02  | 0.00  | 0.03 | 1.00 | 1              | 2     | 1  |  |
| Q9D662  | Protein transport protein Sec23B OS=Mus musculus GN=Sec23b PE=2 SV=1                          | 1.00  | 1.00  | 1.00 | 0.02 | 0              | 0     | 0  |  |

|        |                                                                                              |      |      |      |      |   |   |   |
|--------|----------------------------------------------------------------------------------------------|------|------|------|------|---|---|---|
| Q9D8B3 | Charged multivesicular body protein 4b OS=Mus musculus GN=Chmp4b PE=2 SV=2                   | 1.00 | 0.02 | 0.02 | 0.02 | 0 | 1 | 1 |
| Q9DB77 | Cytochrome b-c1 complex subunit 2, mitochondrial OS=Mus musculus GN=Uqcrc2 PE=1 SV=1         | 0.04 | 0.02 | 0.02 | 1.00 | 1 | 1 | 1 |
| Q9DBG5 | Perilipin-3 OS=Mus musculus GN=Plin3 PE=1 SV=1                                               | 1.00 | 1.00 | 0.03 | 1.00 | 0 | 0 | 1 |
| Q9DBG6 | Dolichyl-diphosphooligosaccharide--protein glycosyltransferase subunit 2 OS=Mus musculus GN: | 0.03 | 1.00 | 1.00 | 0.02 | 1 | 0 | 0 |
| Q9DBZ1 | Inhibitor of nuclear factor kappa-B kinase-interacting protein OS=Mus musculus GN=Ikbip PE=1 | 1.00 | 1.00 | 1.00 | 0.07 | 0 | 0 | 0 |
| Q9DCF9 | Translocon-associated protein subunit gamma OS=Mus musculus GN=Ssr3 PE=1 SV=1                | 1.00 | 1.00 | 1.00 | 0.02 | 0 | 0 | 0 |
| Q9DCN2 | NADH-cytochrome b5 reductase 3 OS=Mus musculus GN=Cyb5r3 PE=1 SV=3                           | 1.00 | 0.04 | 0.00 | 0.00 | 0 | 1 | 3 |
| Q9DCX2 | ATP synthase subunit d, mitochondrial OS=Mus musculus GN=Atp5h PE=1 SV=3                     | 1.00 | 1.00 | 0.02 | 1.00 | 0 | 0 | 1 |
| Q9QYB5 | Gamma-adducin OS=Mus musculus GN=Add3 PE=1 SV=2                                              | 1.00 | 1.00 | 1.00 | 0.00 | 0 | 0 | 0 |
| Q9QYC0 | Alpha-adducin OS=Mus musculus GN=Add1 PE=1 SV=2                                              | 1.00 | 1.00 | 0.00 | 0.00 | 0 | 0 | 2 |
| Q9R0P6 | Signal peptidase complex catalytic subunit SEC11A OS=Mus musculus GN=Sec11a PE=2 SV=1        | 1.00 | 0.03 | 1.00 | 1.00 | 0 | 1 | 0 |
| Q9R0Q3 | Transmembrane emp24 domain-containing protein 2 OS=Mus musculus GN=Tmed2 PE=1 SV=1           | 0.02 | 0.00 | 0.02 | 0.03 | 1 | 2 | 1 |
| Q9WV80 | Sorting nexin-1 OS=Mus musculus GN=Snx1 PE=1 SV=1                                            | 1.00 | 1.00 | 0.02 | 0.02 | 0 | 0 | 1 |
| Q9Z0X1 | Apoptosis-inducing factor 1, mitochondrial OS=Mus musculus GN=Aifm1 PE=1 SV=1                | 1.00 | 0.00 | 1.00 | 0.06 | 0 | 2 | 0 |



| p14 | Spectral Counts |       |    | p14 | Normalized Spectral Counts |        |        |        | gene     |
|-----|-----------------|-------|----|-----|----------------------------|--------|--------|--------|----------|
|     | e15.5           | e17.5 | p2 |     | e15.5                      | e17.5  | p2     | p14    |          |
| 35  | 0               | 12    | 22 | 74  | 0.0000                     | 0.0017 | 0.0062 | 0.0208 | Spna2    |
| 1   | 0               | 0     | 0  | 1   | 0.0000                     | 0.0000 | 0.0000 | 0.0003 | Sec22b   |
| 2   | 0               | 0     | 0  | 7   | 0.0000                     | 0.0000 | 0.0000 | 0.0020 | Ptgis    |
| 0   | 0               | 7     | 2  | 0   | 0.0000                     | 0.0010 | 0.0006 | 0.0000 | Phb2     |
| 1   | 0               | 0     | 0  | 1   | 0.0000                     | 0.0000 | 0.0000 | 0.0003 | Myadm    |
| 2   | 0               | 2     | 0  | 4   | 0.0000                     | 0.0003 | 0.0000 | 0.0011 | Ddost    |
| 0   | 0               | 3     | 0  | 0   | 0.0000                     | 0.0004 | 0.0000 | 0.0000 | Pgrmc1   |
| 2   | 0               | 0     | 0  | 2   | 0.0000                     | 0.0000 | 0.0000 | 0.0006 | Entpd2   |
| 1   | 0               | 0     | 0  | 2   | 0.0000                     | 0.0000 | 0.0000 | 0.0006 | Copb2    |
| 1   | 0               | 0     | 0  | 1   | 0.0000                     | 0.0000 | 0.0000 | 0.0003 | Cyp8b1   |
| 2   | 2               | 35    | 15 | 4   | 0.0015                     | 0.0049 | 0.0043 | 0.0011 | Aldoa    |
| 0   | 0               | 1     | 2  | 0   | 0.0000                     | 0.0001 | 0.0006 | 0.0000 | Itga5    |
| 0   | 0               | 1     | 0  | 0   | 0.0000                     | 0.0001 | 0.0000 | 0.0000 | H2-Q9    |
| 8   | 3               | 21    | 15 | 16  | 0.0023                     | 0.0030 | 0.0043 | 0.0045 | Lmnb1    |
| 6   | 0               | 0     | 0  | 12  | 0.0000                     | 0.0000 | 0.0000 | 0.0034 | Tgm2     |
| 3   | 33              | 68    | 24 | 9   | 0.0255                     | 0.0096 | 0.0068 | 0.0025 | Marcks   |
| 8   | 0               | 8     | 0  | 14  | 0.0000                     | 0.0011 | 0.0000 | 0.0039 | Canx     |
| 0   | 0               | 4     | 0  | 0   | 0.0000                     | 0.0006 | 0.0000 | 0.0000 | Fkbp2    |
| 1   | 0               | 0     | 0  | 1   | 0.0000                     | 0.0000 | 0.0000 | 0.0003 | Aldh3a2  |
| 1   | 0               | 1     | 2  | 2   | 0.0000                     | 0.0001 | 0.0006 | 0.0006 | Capza1   |
| 1   | 0               | 1     | 1  | 2   | 0.0000                     | 0.0001 | 0.0003 | 0.0006 | Capzb    |
| 0   | 0               | 2     | 0  | 0   | 0.0000                     | 0.0003 | 0.0000 | 0.0000 | Cox7a2   |
| 1   | 0               | 0     | 0  | 1   | 0.0000                     | 0.0000 | 0.0000 | 0.0003 | Cyb5a    |
| 1   | 2               | 1     | 0  | 1   | 0.0015                     | 0.0001 | 0.0000 | 0.0003 | Ucp3     |
| 0   | 3               | 5     | 0  | 0   | 0.0023                     | 0.0007 | 0.0000 | 0.0000 | Drd2     |
| 2   | 0               | 1     | 0  | 4   | 0.0000                     | 0.0001 | 0.0000 | 0.0011 | Dad1     |
| 0   | 0               | 0     | 2  | 0   | 0.0000                     | 0.0000 | 0.0006 | 0.0000 | Pafah1b1 |
| 4   | 8               | 7     | 2  | 8   | 0.0062                     | 0.0010 | 0.0006 | 0.0023 | Eif5a    |
| 0   | 0               | 0     | 1  | 0   | 0.0000                     | 0.0000 | 0.0003 | 0.0000 | Phb      |
| 2   | 0               | 0     | 4  | 5   | 0.0000                     | 0.0000 | 0.0011 | 0.0014 | Slc9a3r1 |
| 2   | 0               | 0     | 2  | 3   | 0.0000                     | 0.0000 | 0.0006 | 0.0008 | Anpep    |
| 0   | 0               | 2     | 0  | 0   | 0.0000                     | 0.0003 | 0.0000 | 0.0000 | Atp5j    |
| 8   | 0               | 0     | 0  | 18  | 0.0000                     | 0.0000 | 0.0000 | 0.0051 | Jup      |
| 1   | 0               | 0     | 4  | 2   | 0.0000                     | 0.0000 | 0.0011 | 0.0006 | Rac2     |
| 0   | 0               | 2     | 5  | 0   | 0.0000                     | 0.0003 | 0.0014 | 0.0000 | Atp5i    |
| 0   | 2               | 16    | 12 | 0   | 0.0015                     | 0.0023 | 0.0034 | 0.0000 | Igf2r    |
| 0   | 0               | 2     | 0  | 0   | 0.0000                     | 0.0003 | 0.0000 | 0.0000 | Dlk1     |
| 1   | 0               | 0     | 0  | 2   | 0.0000                     | 0.0000 | 0.0000 | 0.0006 | Esyt1    |
| 0   | 0               | 1     | 0  | 0   | 0.0000                     | 0.0001 | 0.0000 | 0.0000 | Trpm3    |
| 1   | 0               | 0     | 0  | 1   | 0.0000                     | 0.0000 | 0.0000 | 0.0003 | Arcn1    |
| 0   | 0               | 0     | 1  | 0   | 0.0000                     | 0.0000 | 0.0003 | 0.0000 | Reep5    |
| 1   | 0               | 0     | 0  | 1   | 0.0000                     | 0.0000 | 0.0000 | 0.0003 | Vdac3    |
| 2   | 0               | 13    | 5  | 4   | 0.0000                     | 0.0018 | 0.0014 | 0.0011 | Vdac1    |
| 0   | 0               | 0     | 3  | 0   | 0.0000                     | 0.0000 | 0.0009 | 0.0000 | Dmbt1    |
| 2   | 0               | 1     | 5  | 3   | 0.0000                     | 0.0001 | 0.0014 | 0.0008 | Tmpo     |
| 0   | 0               | 2     | 0  | 0   | 0.0000                     | 0.0003 | 0.0000 | 0.0000 | Pde3b    |
| 1   | 0               | 0     | 0  | 1   | 0.0000                     | 0.0000 | 0.0000 | 0.0003 | Gdi2     |
| 27  | 0               | 1     | 23 | 57  | 0.0000                     | 0.0001 | 0.0065 | 0.0161 | Sptbn1   |
| 1   | 0               | 14    | 6  | 2   | 0.0000                     | 0.0020 | 0.0017 | 0.0006 | Selenbp2 |
| 0   | 0               | 1     | 0  | 0   | 0.0000                     | 0.0001 | 0.0000 | 0.0000 | Ccpq1    |
| 0   | 0               | 2     | 0  | 0   | 0.0000                     | 0.0003 | 0.0000 | 0.0000 | Cd34     |
| 2   | 0               | 0     | 0  | 2   | 0.0000                     | 0.0000 | 0.0000 | 0.0006 | Cltc     |
| 0   | 3               | 0     | 0  | 0   | 0.0023                     | 0.0000 | 0.0000 | 0.0000 | Nav3     |
| 0   | 0               | 0     | 2  | 0   | 0.0000                     | 0.0000 | 0.0006 | 0.0000 | Mtdh     |
| 3   | 0               | 0     | 0  | 7   | 0.0000                     | 0.0000 | 0.0000 | 0.0020 | Ehd2     |
| 1   | 0               | 0     | 0  | 2   | 0.0000                     | 0.0000 | 0.0000 | 0.0006 | Asph     |
| 1   | 0               | 0     | 2  | 2   | 0.0000                     | 0.0000 | 0.0006 | 0.0006 | Aifm2    |
| 1   | 0               | 0     | 0  | 1   | 0.0000                     | 0.0000 | 0.0000 | 0.0003 | Copa     |
| 1   | 3               | 3     | 6  | 2   | 0.0023                     | 0.0004 | 0.0017 | 0.0006 | Sdha     |
| 1   | 0               | 3     | 6  | 6   | 0.0000                     | 0.0004 | 0.0017 | 0.0017 | Ssspta   |
| 3   | 0               | 1     | 4  | 6   | 0.0000                     | 0.0001 | 0.0011 | 0.0017 | Rpn1     |
| 0   | 0               | 1     | 0  | 0   | 0.0000                     | 0.0001 | 0.0000 | 0.0000 | Ggt7     |
| 2   | 0               | 4     | 2  | 5   | 0.0000                     | 0.0006 | 0.0006 | 0.0014 | Tmed9    |
| 1   | 0               | 0     | 0  | 1   | 0.0000                     | 0.0000 | 0.0000 | 0.0003 | Dctn2    |
| 11  | 0               | 34    | 20 | 20  | 0.0000                     | 0.0048 | 0.0057 | 0.0056 | Rrbp1    |
| 0   | 2               | 2     | 0  | 0   | 0.0015                     | 0.0003 | 0.0000 | 0.0000 | Cox6c    |
| 0   | 0               | 0     | 1  | 0   | 0.0000                     | 0.0000 | 0.0003 | 0.0000 | Atp5f1   |
| 2   | 2               | 5     | 11 | 4   | 0.0015                     | 0.0007 | 0.0031 | 0.0011 | Ssr1     |
| 0   | 0               | 0     | 1  | 0   | 0.0000                     | 0.0000 | 0.0003 | 0.0000 | Uqcr1    |
| 1   | 0               | 0     | 0  | 1   | 0.0000                     | 0.0000 | 0.0000 | 0.0003 | Cmtm6    |
| 0   | 0               | 0     | 2  | 0   | 0.0000                     | 0.0000 | 0.0006 | 0.0000 | Sec13    |
| 0   | 9               | 8     | 1  | 0   | 0.0069                     | 0.0011 | 0.0003 | 0.0000 | Atp5d    |
| 1   | 0               | 0     | 0  | 1   | 0.0000                     | 0.0000 | 0.0000 | 0.0003 | Sec23b   |

|   |   |   |    |   |        |        |        |        |        |
|---|---|---|----|---|--------|--------|--------|--------|--------|
| 1 | 0 | 3 | 5  | 1 | 0.0000 | 0.0004 | 0.0014 | 0.0003 | Chmp4b |
| 0 | 1 | 2 | 1  | 0 | 0.0008 | 0.0003 | 0.0003 | 0.0000 | Uqcrc2 |
| 0 | 0 | 0 | 1  | 0 | 0.0000 | 0.0000 | 0.0003 | 0.0000 | Plin3  |
| 1 | 3 | 0 | 0  | 2 | 0.0023 | 0.0000 | 0.0000 | 0.0006 | Rpn2   |
| 1 | 0 | 0 | 0  | 1 | 0.0000 | 0.0000 | 0.0000 | 0.0003 | Ikbip  |
| 1 | 0 | 0 | 0  | 2 | 0.0000 | 0.0000 | 0.0000 | 0.0006 | Ssr3   |
| 4 | 0 | 2 | 13 | 8 | 0.0000 | 0.0003 | 0.0037 | 0.0023 | Cyb5r3 |
| 0 | 0 | 0 | 8  | 0 | 0.0000 | 0.0000 | 0.0023 | 0.0000 | Atp5h  |
| 3 | 0 | 0 | 0  | 5 | 0.0000 | 0.0000 | 0.0000 | 0.0014 | Add3   |
| 2 | 0 | 0 | 5  | 4 | 0.0000 | 0.0000 | 0.0014 | 0.0011 | Add1   |
| 0 | 0 | 1 | 0  | 0 | 0.0000 | 0.0001 | 0.0000 | 0.0000 | Sec11a |
| 1 | 1 | 7 | 2  | 2 | 0.0008 | 0.0010 | 0.0006 | 0.0006 | Tmed2  |
| 1 | 0 | 0 | 5  | 1 | 0.0000 | 0.0000 | 0.0014 | 0.0003 | Snx1   |
| 1 | 0 | 2 | 0  | 1 | 0.0000 | 0.0003 | 0.0000 | 0.0003 | Aifm1  |

| protein | annotation                                                                                          | FDR   |       |      |      | Unique Peptides |       |    |     | Spectral |
|---------|-----------------------------------------------------------------------------------------------------|-------|-------|------|------|-----------------|-------|----|-----|----------|
|         |                                                                                                     | e15.5 | e17.5 | p2   | p14  | e15.5           | e17.5 | p2 | p14 | e15.5    |
| E9Q557  | Desmoplakin OS=Mus musculus GN=Dsp PE=3 SV=1                                                        | 1.00  | 0.00  | 0.00 | 0.00 | 0               | 2     | 3  | 19  | 0        |
| P09055  | Integrin beta-1 OS=Mus musculus GN=Itgb1 PE=1 SV=1                                                  | 1.00  | 0.03  | 0.08 | 0.04 | 0               | 1     | 1  | 1   | 0        |
| P11688  | Integrin alpha-5 OS=Mus musculus GN=Itga5 PE=1 SV=3                                                 | 1.00  | 0.04  | 0.02 | 1.00 | 0               | 1     | 1  | 0   | 0        |
| P13020  | Gelsolin OS=Mus musculus GN=Gsn PE=1 SV=3                                                           | 0.05  | 0.00  | 0.00 | 0.00 | 1               | 3     | 4  | 3   | 2        |
| P16045  | Galectin-1 OS=Mus musculus GN=Lgals1 PE=1 SV=3                                                      | 0.02  | 0.00  | 0.00 | 0.00 | 1               | 6     | 4  | 7   | 7        |
| P19157  | Glutathione S-transferase P 1 OS=Mus musculus GN=Gstp1 PE=1 SV=2                                    | 1.00  | 0.02  | 1.00 | 0.00 | 0               | 1     | 0  | 3   | 0        |
| P21981  | Protein-glutamine gamma-glutamyltransferase 2 OS=Mus musculus GN=Tgm2 PE=1 SV=4                     | 1.00  | 1.00  | 1.00 | 0.00 | 0               | 0     | 0  | 6   | 0        |
| P26039  | Talin-1 OS=Mus musculus GN=Tln1 PE=1 SV=2                                                           | 1.00  | 0.02  | 0.02 | 0.00 | 0               | 1     | 1  | 5   | 0        |
| P26040  | Ezrin OS=Mus musculus GN=Ezr PE=1 SV=3                                                              | 1.00  | 0.02  | 0.02 | 0.00 | 0               | 1     | 1  | 2   | 0        |
| P26041  | Moesin OS=Mus musculus GN=Msn PE=1 SV=3                                                             | 0.03  | 0.00  | 0.00 | 0.00 | 1               | 5     | 3  | 4   | 3        |
| P28843  | Dipeptidyl peptidase 4 OS=Mus musculus GN=Dpp4 PE=1 SV=3                                            | 1.00  | 1.00  | 1.00 | 0.02 | 0               | 0     | 0  | 1   | 0        |
| P52793  | Ephrin-A1 OS=Mus musculus GN=Efna1 PE=2 SV=1                                                        | 1.00  | 0.07  | 1.00 | 1.00 | 0               | 1     | 0  | 0   | 0        |
| P56480  | ATP synthase subunit beta, mitochondrial OS=Mus musculus GN=Atp5b PE=1 SV=2                         | 0.00  | 0.00  | 0.00 | 0.00 | 4               | 6     | 3  | 9   | 21       |
| P60766  | Cell division control protein 42 homolog OS=Mus musculus GN=Cdc42 PE=1 SV=2                         | 1.00  | 0.00  | 0.02 | 1.00 | 0               | 2     | 1  | 0   | 0        |
| P62141  | Serine/threonine-protein phosphatase PP1-beta catalytic subunit OS=Mus musculus GN=Ppp1cb PE=1 SV=3 | 1.00  | 0.02  | 1.00 | 1.00 | 0               | 1     | 0  | 0   | 0        |
| P97300  | Neuroplastin OS=Mus musculus GN=Nptn PE=1 SV=3                                                      | 1.00  | 1.00  | 0.07 | 0.08 | 0               | 0     | 1  | 1   | 0        |
| P97350  | Plakophilin-1 OS=Mus musculus GN=Pkp1 PE=1 SV=1                                                     | 1.00  | 1.00  | 1.00 | 0.02 | 0               | 0     | 0  | 1   | 0        |
| Q02257  | Junction plakoglobin OS=Mus musculus GN=Jup PE=1 SV=3                                               | 1.00  | 1.00  | 1.00 | 0.00 | 0               | 0     | 0  | 8   | 0        |
| Q04857  | Collagen alpha-1(VI) chain OS=Mus musculus GN=Col6a1 PE=2 SV=1                                      | 1.00  | 1.00  | 0.02 | 0.04 | 0               | 0     | 1  | 1   | 0        |
| Q64314  | Hematopoietic progenitor cell antigen CD34 OS=Mus musculus GN=Cd34 PE=1 SV=1                        | 1.00  | 0.07  | 1.00 | 1.00 | 0               | 1     | 0  | 0   | 0        |
| Q64727  | Vinculin OS=Mus musculus GN=Vcl PE=1 SV=4                                                           | 1.00  | 0.02  | 0.00 | 0.00 | 0               | 1     | 4  | 8   | 0        |
| Q8VDD5  | Myosin-9 OS=Mus musculus GN=Myh9 PE=1 SV=4                                                          | 1.00  | 1.00  | 0.00 | 0.00 | 0               | 0     | 3  | 15  | 0        |
| Q9QU10  | Transforming protein RhoA OS=Mus musculus GN=Rhoa PE=1 SV=1                                         | 1.00  | 0.04  | 0.00 | 0.02 | 0               | 1     | 2  | 1   | 0        |
| Q9Z1T2  | Thrombospondin-4 OS=Mus musculus GN=Thbs4 PE=2 SV=1                                                 | 1.00  | 0.05  | 1.00 | 1.00 | 0               | 1     | 0  | 0   | 0        |

| I Counts |    |     | Normalized Spectral Counts |        |        |        | gene   |
|----------|----|-----|----------------------------|--------|--------|--------|--------|
| e17.5    | p2 | p14 | e15.5                      | e17.5  | p2     | p14    |        |
| 3        | 5  | 48  | 0.0000                     | 0.0004 | 0.0014 | 0.0135 | Dsp    |
| 2        | 1  | 1   | 0.0000                     | 0.0003 | 0.0003 | 0.0003 | Itgb1  |
| 1        | 2  | 0   | 0.0000                     | 0.0001 | 0.0006 | 0.0000 | Itga5  |
| 20       | 19 | 5   | 0.0015                     | 0.0028 | 0.0054 | 0.0014 | Gsn    |
| 37       | 23 | 40  | 0.0054                     | 0.0052 | 0.0065 | 0.0113 | Lgals1 |
| 1        | 0  | 7   | 0.0000                     | 0.0001 | 0.0000 | 0.0020 | Gstp1  |
| 0        | 0  | 12  | 0.0000                     | 0.0000 | 0.0000 | 0.0034 | Tgm2   |
| 2        | 1  | 9   | 0.0000                     | 0.0003 | 0.0003 | 0.0025 | Tln1   |
| 12       | 4  | 2   | 0.0000                     | 0.0017 | 0.0011 | 0.0006 | Ezr    |
| 18       | 11 | 7   | 0.0023                     | 0.0025 | 0.0031 | 0.0020 | Msn    |
| 0        | 0  | 2   | 0.0000                     | 0.0000 | 0.0000 | 0.0006 | Dpp4   |
| 1        | 0  | 0   | 0.0000                     | 0.0001 | 0.0000 | 0.0000 | Efna1  |
| 22       | 9  | 17  | 0.0162                     | 0.0031 | 0.0026 | 0.0048 | Atp5b  |
| 3        | 3  | 0   | 0.0000                     | 0.0004 | 0.0009 | 0.0000 | Cdc42  |
| 3        | 0  | 0   | 0.0000                     | 0.0004 | 0.0000 | 0.0000 | Ppp1cb |
| 0        | 1  | 1   | 0.0000                     | 0.0000 | 0.0003 | 0.0003 | Nptn   |
| 0        | 0  | 2   | 0.0000                     | 0.0000 | 0.0000 | 0.0006 | Pkp1   |
| 0        | 0  | 18  | 0.0000                     | 0.0000 | 0.0000 | 0.0051 | Jup    |
| 0        | 2  | 1   | 0.0000                     | 0.0000 | 0.0006 | 0.0003 | Col6a1 |
| 2        | 0  | 0   | 0.0000                     | 0.0003 | 0.0000 | 0.0000 | Cd34   |
| 4        | 7  | 14  | 0.0000                     | 0.0006 | 0.0020 | 0.0039 | Vcl    |
| 0        | 7  | 26  | 0.0000                     | 0.0000 | 0.0020 | 0.0073 | Myh9   |
| 1        | 7  | 2   | 0.0000                     | 0.0001 | 0.0020 | 0.0006 | Rhoa   |
| 2        | 0  | 0   | 0.0000                     | 0.0003 | 0.0000 | 0.0000 | Thbs4  |

| protein | annotation                                                                                         | FDR   |       |      |      | Unique Peptides |       |
|---------|----------------------------------------------------------------------------------------------------|-------|-------|------|------|-----------------|-------|
|         |                                                                                                    | e15.5 | e17.5 | p2   | p14  | e15.5           | e17.5 |
| O08553  | Dihydropyrimidinase-related protein 2 OS=Mus musculus GN=Dpysl2 PE=1 SV=2                          | 1.00  | 0.02  | 0.02 | 0.00 | 0               | 1     |
| O35639  | Annexin A3 OS=Mus musculus GN=Anxa3 PE=1 SV=4                                                      | 1.00  | 1.00  | 1.00 | 0.00 | 0               | 0     |
| O35855  | Branched-chain-amino-acid aminotransferase, mitochondrial OS=Mus musculus GN=Bcat2 PE=2 SV=2       | 1.00  | 0.03  | 1.00 | 1.00 | 0               | 1     |
| P07356  | Annexin A2 OS=Mus musculus GN=Anxa2 PE=1 SV=2                                                      | 0.00  | 0.00  | 0.00 | 0.00 | 2               | 6     |
| P10107  | Annexin A1 OS=Mus musculus GN=Anxa1 PE=1 SV=2                                                      | 1.00  | 1.00  | 0.00 | 0.00 | 0               | 0     |
| P26443  | Glutamate dehydrogenase 1, mitochondrial OS=Mus musculus GN=Glud1 PE=1 SV=1                        | 1.00  | 1.00  | 0.02 | 1.00 | 0               | 0     |
| P34884  | Macrophage migration inhibitory factor OS=Mus musculus GN=Mif PE=1 SV=2                            | 0.04  | 0.02  | 1.00 | 1.00 | 1               | 1     |
| P49817  | Caveolin-1 OS=Mus musculus GN=Cav1 PE=1 SV=1                                                       | 1.00  | 1.00  | 0.05 | 0.00 | 0               | 0     |
| P52927  | High mobility group protein HMGI-C OS=Mus musculus GN=Hmga2 PE=1 SV=1                              | 0.02  | 0.05  | 1.00 | 1.00 | 1               | 1     |
| P57759  | Endoplasmic reticulum resident protein 29 OS=Mus musculus GN=Erp29 PE=1 SV=2                       | 1.00  | 0.05  | 1.00 | 1.00 | 0               | 1     |
| P61168  | D(2) dopamine receptor OS=Mus musculus GN=Drd2 PE=2 SV=2                                           | 0.04  | 0.03  | 1.00 | 1.00 | 1               | 1     |
| P63101  | 14-3-3 protein zeta/delta OS=Mus musculus GN=Ywhaz PE=1 SV=1                                       | 0.00  | 0.00  | 0.00 | 0.00 | 5               | 11    |
| P70441  | Na(+)/H(+) exchange regulatory cofactor NHE-RF1 OS=Mus musculus GN=Slc9a3r1 PE=1 SV=3              | 1.00  | 1.00  | 0.02 | 0.00 | 0               | 0     |
| P97352  | Protein S100-A13 OS=Mus musculus GN=S100a13 PE=1 SV=1                                              | 1.00  | 1.00  | 0.02 | 0.02 | 0               | 0     |
| P97449  | Aminopeptidase N OS=Mus musculus GN=Anpep PE=1 SV=4                                                | 1.00  | 1.00  | 0.03 | 0.00 | 0               | 0     |
| Q00519  | Xanthine dehydrogenase/oxidase OS=Mus musculus GN=Xdh PE=1 SV=5                                    | 1.00  | 1.00  | 1.00 | 0.02 | 0               | 0     |
| Q3TJ91  | Lethal(2) giant larvae protein homolog 2 OS=Mus musculus GN=Llg2 PE=2 SV=2                         | 1.00  | 0.04  | 1.00 | 1.00 | 0               | 1     |
| Q61409  | cGMP-inhibited 3',5'-cyclic phosphodiesterase B OS=Mus musculus GN=Pde3b PE=1 SV=2                 | 1.00  | 0.02  | 1.00 | 1.00 | 0               | 1     |
| Q61425  | Hydroxyacyl-coenzyme A dehydrogenase, mitochondrial OS=Mus musculus GN=Hadh PE=1 SV=2              | 1.00  | 0.00  | 1.00 | 1.00 | 0               | 2     |
| Q61879  | Myosin-10 OS=Mus musculus GN=Myh10 PE=1 SV=2                                                       | 1.00  | 1.00  | 1.00 | 0.02 | 0               | 0     |
| Q64285  | Bile salt-activated lipase OS=Mus musculus GN=Cel PE=1 SV=1                                        | 1.00  | 0.00  | 0.02 | 0.00 | 0               | 6     |
| Q91V41  | Ras-related protein Rab-14 OS=Mus musculus GN=Rab14 PE=1 SV=3                                      | 1.00  | 0.02  | 1.00 | 1.00 | 0               | 1     |
| Q99P72  | Reticulon-4 OS=Mus musculus GN=Rtn4 PE=1 SV=2                                                      | 1.00  | 0.02  | 1.00 | 0.00 | 0               | 1     |
| Q9D0K2  | Succinyl-CoA:3-ketoacid-coenzyme A transferase 1, mitochondrial OS=Mus musculus GN=Oxct1 PE=1 SV=1 | 1.00  | 0.02  | 1.00 | 1.00 | 0               | 1     |
| Q9D1D4  | Transmembrane emp24 domain-containing protein 10 OS=Mus musculus GN=Tmed10 PE=2 SV=1               | 1.00  | 0.00  | 1.00 | 0.00 | 0               | 2     |
| Q9EPC2  | Fibroblast growth factor 23 OS=Mus musculus GN=Fgf23 PE=1 SV=1                                     | 1.00  | 0.03  | 1.00 | 1.00 | 0               | 1     |
| Q9JIW9  | Ras-related protein Ral-B OS=Mus musculus GN=Ralb PE=2 SV=1                                        | 1.00  | 0.05  | 1.00 | 1.00 | 0               | 1     |

| p2 | Spectral Counts |       |       |    | Normalized Spectral Counts |        |        |        | gene   |          |
|----|-----------------|-------|-------|----|----------------------------|--------|--------|--------|--------|----------|
|    | p14             | e15.5 | e17.5 | p2 | p14                        | e15.5  | e17.5  | p2     |        | p14      |
| 1  | 7               | 0     | 14    | 6  | 12                         | 0.0000 | 0.0020 | 0.0017 | 0.0033 | Dpysl2   |
| 0  | 4               | 0     | 0     | 0  | 7                          | 0.0000 | 0.0000 | 0.0000 | 0.0000 | Anxa3    |
| 0  | 0               | 0     | 2     | 0  | 0                          | 0.0000 | 0.0003 | 0.0000 | 0.0000 | Bcat2    |
| 4  | 14              | 11    | 60    | 40 | 66                         | 0.0085 | 0.0084 | 0.0114 | 0.0200 | Anxa2    |
| 4  | 10              | 0     | 0     | 26 | 25                         | 0.0000 | 0.0000 | 0.0074 | 0.0011 | Anxa1    |
| 1  | 0               | 0     | 0     | 1  | 0                          | 0.0000 | 0.0000 | 0.0003 | 0.0000 | Glud1    |
| 0  | 0               | 2     | 2     | 0  | 0                          | 0.0015 | 0.0003 | 0.0000 | 0.0000 | Mif      |
| 1  | 2               | 0     | 0     | 2  | 9                          | 0.0000 | 0.0000 | 0.0006 | 0.0000 | Cav1     |
| 0  | 0               | 1     | 1     | 0  | 0                          | 0.0008 | 0.0001 | 0.0000 | 0.0000 | Hmga2    |
| 0  | 0               | 0     | 2     | 0  | 0                          | 0.0000 | 0.0003 | 0.0000 | 0.0000 | Erp29    |
| 0  | 0               | 3     | 5     | 0  | 0                          | 0.0023 | 0.0007 | 0.0000 | 0.0000 | Drd2     |
| 3  | 9               | 14    | 87    | 19 | 29                         | 0.0108 | 0.0122 | 0.0054 | 0.0133 | Ywhaz    |
| 1  | 2               | 0     | 0     | 4  | 5                          | 0.0000 | 0.0000 | 0.0011 | 0.0000 | Slc9a3r1 |
| 1  | 1               | 0     | 0     | 2  | 2                          | 0.0000 | 0.0000 | 0.0006 | 0.0000 | S100a13  |
| 1  | 2               | 0     | 0     | 2  | 3                          | 0.0000 | 0.0000 | 0.0006 | 0.0000 | Anpep    |
| 0  | 1               | 0     | 0     | 0  | 1                          | 0.0000 | 0.0000 | 0.0000 | 0.0000 | Xdh      |
| 0  | 0               | 0     | 2     | 0  | 0                          | 0.0000 | 0.0003 | 0.0000 | 0.0000 | Lig2     |
| 0  | 0               | 0     | 2     | 0  | 0                          | 0.0000 | 0.0003 | 0.0000 | 0.0000 | Pde3b    |
| 0  | 0               | 0     | 6     | 0  | 0                          | 0.0000 | 0.0008 | 0.0000 | 0.0000 | Hadh     |
| 0  | 1               | 0     | 0     | 0  | 2                          | 0.0000 | 0.0000 | 0.0000 | 0.0000 | Myh10    |
| 1  | 4               | 0     | 25    | 3  | 9                          | 0.0000 | 0.0035 | 0.0009 | 0.0011 | Cel      |
| 0  | 0               | 0     | 2     | 0  | 0                          | 0.0000 | 0.0003 | 0.0000 | 0.0000 | Rab14    |
| 0  | 3               | 0     | 1     | 0  | 4                          | 0.0000 | 0.0001 | 0.0000 | 0.0000 | Rtn4     |
| 0  | 0               | 0     | 2     | 0  | 0                          | 0.0000 | 0.0003 | 0.0000 | 0.0011 | Oxct1    |
| 0  | 3               | 0     | 4     | 0  | 4                          | 0.0000 | 0.0006 | 0.0000 | 0.0000 | Tmed10   |
| 0  | 0               | 0     | 2     | 0  | 0                          | 0.0000 | 0.0003 | 0.0000 | 0.0000 | Fgf23    |
| 0  | 0               | 0     | 1     | 0  | 0                          | 0.0000 | 0.0001 | 0.0000 | 0.0000 | Ralb     |

| protein | annotation                                                                                  | FDR   |       |      |      | Unique Peptides |       |    |     | Spectral |
|---------|---------------------------------------------------------------------------------------------|-------|-------|------|------|-----------------|-------|----|-----|----------|
|         |                                                                                             | e15.5 | e17.5 | p2   | p14  | e15.5           | e17.5 | p2 | p14 | e15.5    |
| A2ASQ1  | Agrin OS=Mus musculus GN=Agrn PE=2 SV=1                                                     | 0.07  | 1.00  | 1.00 | 1.00 | 1               | 0     | 0  | 0   | 1        |
| O55026  | Ectonucleoside triphosphate diphosphohydrolase 2 OS=Mus musculus GN=Entpd2 PE=1 SV=2        | 1.00  | 1.00  | 1.00 | 0.00 | 0               | 0     | 0  | 2   | 0        |
| P07356  | Annexin A2 OS=Mus musculus GN=Anxa2 PE=1 SV=2                                               | 0.00  | 0.00  | 0.00 | 0.00 | 2               | 6     | 4  | 14  | 11       |
| P07724  | Serum albumin OS=Mus musculus GN=Alb PE=1 SV=3                                              | 1.00  | 0.02  | 1.00 | 0.00 | 0               | 1     | 0  | 4   | 0        |
| P08228  | Superoxide dismutase [Cu-Zn] OS=Mus musculus GN=Sod1 PE=1 SV=2                              | 0.02  | 0.00  | 0.00 | 0.00 | 1               | 4     | 3  | 4   | 6        |
| P09055  | Integrin beta-1 OS=Mus musculus GN=Itgb1 PE=1 SV=1                                          | 1.00  | 0.03  | 0.08 | 0.04 | 0               | 1     | 1  | 1   | 0        |
| P14211  | Calreticulin OS=Mus musculus GN=Calr PE=1 SV=1                                              | 0.00  | 0.00  | 0.00 | 0.00 | 2               | 7     | 5  | 9   | 6        |
| P16045  | Galectin-1 OS=Mus musculus GN=Lgals1 PE=1 SV=3                                              | 0.02  | 0.00  | 0.00 | 0.00 | 1               | 6     | 4  | 7   | 7        |
| P21981  | Protein-glutamine gamma-glutamyltransferase 2 OS=Mus musculus GN=Tgm2 PE=1 SV=4             | 1.00  | 1.00  | 1.00 | 0.00 | 0               | 0     | 0  | 6   | 0        |
| Q04857  | Collagen alpha-1(VI) chain OS=Mus musculus GN=Col6a1 PE=2 SV=1                              | 1.00  | 1.00  | 0.02 | 0.04 | 0               | 0     | 1  | 1   | 0        |
| Q3V1T4  | Prolyl 3-hydroxylase 1 OS=Mus musculus GN=Lepre1 PE=2 SV=2                                  | 1.00  | 1.00  | 1.00 | 0.02 | 0               | 0     | 0  | 1   | 0        |
| Q60997  | Deleted in malignant brain tumors 1 protein OS=Mus musculus GN=Dmbt1 PE=1 SV=2              | 1.00  | 1.00  | 0.00 | 1.00 | 0               | 0     | 2  | 0   | 0        |
| Q9D1D6  | Collagen triple helix repeat-containing protein 1 OS=Mus musculus GN=Cthrc1 PE=2 SV=1       | 1.00  | 0.05  | 1.00 | 1.00 | 0               | 1     | 0  | 0   | 0        |
| Q9D8U4  | Complement C1q tumor necrosis factor-related protein 2 OS=Mus musculus GN=C1qtnf2 PE=2 SV=1 | 1.00  | 0.02  | 0.03 | 1.00 | 0               | 1     | 1  | 0   | 0        |
| Q9Z1T2  | Thrombospondin-4 OS=Mus musculus GN=Thbs4 PE=2 SV=1                                         | 1.00  | 0.05  | 1.00 | 1.00 | 0               | 1     | 0  | 0   | 0        |

| I Counts |    |     | Normalized Spectral Counts |        |        |        | gene    |
|----------|----|-----|----------------------------|--------|--------|--------|---------|
| e17.5    | p2 | p14 | e15.5                      | e17.5  | p2     | p14    |         |
| 0        | 0  | 0   | 0.0008                     | 0.0000 | 0.0000 | 0.0000 | Agm     |
| 0        | 0  | 2   | 0.0000                     | 0.0000 | 0.0000 | 0.0006 | Entpd2  |
| 60       | 40 | 66  | 0.0085                     | 0.0084 | 0.0114 | 0.0186 | Anxa2   |
| 8        | 0  | 6   | 0.0000                     | 0.0011 | 0.0000 | 0.0017 | Alb     |
| 34       | 20 | 15  | 0.0046                     | 0.0048 | 0.0057 | 0.0042 | Sod1    |
| 2        | 1  | 1   | 0.0000                     | 0.0003 | 0.0003 | 0.0003 | Itgb1   |
| 53       | 21 | 22  | 0.0046                     | 0.0075 | 0.0060 | 0.0062 | Calr    |
| 37       | 23 | 40  | 0.0054                     | 0.0052 | 0.0065 | 0.0113 | Lgals1  |
| 0        | 0  | 12  | 0.0000                     | 0.0000 | 0.0000 | 0.0034 | Tgm2    |
| 0        | 2  | 1   | 0.0000                     | 0.0000 | 0.0006 | 0.0003 | Col6a1  |
| 0        | 0  | 1   | 0.0000                     | 0.0000 | 0.0000 | 0.0003 | Lepre1  |
| 0        | 3  | 0   | 0.0000                     | 0.0000 | 0.0009 | 0.0000 | Dmbt1   |
| 2        | 0  | 0   | 0.0000                     | 0.0003 | 0.0000 | 0.0000 | Cthrc1  |
| 4        | 2  | 0   | 0.0000                     | 0.0006 | 0.0006 | 0.0000 | C1qtnf2 |
| 2        | 0  | 0   | 0.0000                     | 0.0003 | 0.0000 | 0.0000 | Thbs4   |



| protein | annotation                                                                                   | FDR   |       |      |      | Unique Peptides |       |    |
|---------|----------------------------------------------------------------------------------------------|-------|-------|------|------|-----------------|-------|----|
|         |                                                                                              | e15.5 | e17.5 | p2   | p14  | e15.5           | e17.5 | p2 |
| P49817  | Caveolin-1 OS=Mus musculus GN=Cav1 PE=1 SV=1                                                 | 1.00  | 1.00  | 0.05 | 0.00 | 0               | 0     | 1  |
| P60766  | Cell division control protein 42 homolog OS=Mus musculus GN=Cdc42 PE=1 SV=2                  | 1.00  | 0.00  | 0.02 | 1.00 | 0               | 2     | 1  |
| P61168  | D(2) dopamine receptor OS=Mus musculus GN=Drd2 PE=2 SV=2                                     | 0.04  | 0.03  | 1.00 | 1.00 | 1               | 1     | 0  |
| P67871  | Casein kinase II subunit beta OS=Mus musculus GN=Csnk2b PE=1 SV=1                            | 1.00  | 1.00  | 0.06 | 1.00 | 0               | 0     | 1  |
| P68040  | Guanine nucleotide-binding protein subunit beta-2-like 1 OS=Mus musculus GN=Gnb2l1 PE=1 SV=3 | 1.00  | 1.00  | 0.02 | 0.05 | 0               | 0     | 1  |
| P70441  | Na(+)/H(+) exchange regulatory cofactor NHE-RF1 OS=Mus musculus GN=Slc9a3r1 PE=1 SV=3        | 1.00  | 1.00  | 0.02 | 0.00 | 0               | 0     | 1  |
| Q3U1J4  | DNA damage-binding protein 1 OS=Mus musculus GN=Ddb1 PE=1 SV=2                               | 1.00  | 1.00  | 0.08 | 1.00 | 0               | 0     | 1  |
| Q91X79  | Elastase 1, pancreatic OS=Mus musculus GN=Cela1 PE=2 SV=1                                    | 1.00  | 0.00  | 0.02 | 0.00 | 0               | 4     | 1  |

| p14 | Spectral Counts |       |    | p14 | Normalized Spectral Counts |         |         |         | gene     |
|-----|-----------------|-------|----|-----|----------------------------|---------|---------|---------|----------|
|     | e15.5           | e17.5 | p2 |     | e15.5                      | e17.5   | p2      | p14     |          |
| 2   | 0               | 0     | 2  | 9   | 0                          | 0       | 0.00057 | 0.00253 | Cav1     |
| 0   | 0               | 3     | 3  | 0   | 0                          | 0.00042 | 0.00085 | 0       | Cdc42    |
| 0   | 3               | 5     | 0  | 0   | 0.00231                    | 0.0007  | 0       | 0       | Drd2     |
| 0   | 0               | 0     | 2  | 0   | 0                          | 0       | 0.00057 | 0       | Csnk2b   |
| 1   | 0               | 0     | 3  | 2   | 0                          | 0       | 0.00085 | 0.00056 | Gnb2l1   |
| 2   | 0               | 0     | 4  | 5   | 0                          | 0       | 0.00114 | 0.00141 | Slc9a3r1 |
| 0   | 0               | 0     | 1  | 0   | 0                          | 0       | 0.00028 | 0       | Ddb1     |
| 4   | 0               | 28    | 4  | 11  | 0                          | 0.00394 | 0.00114 | 0.0031  | Cela1    |

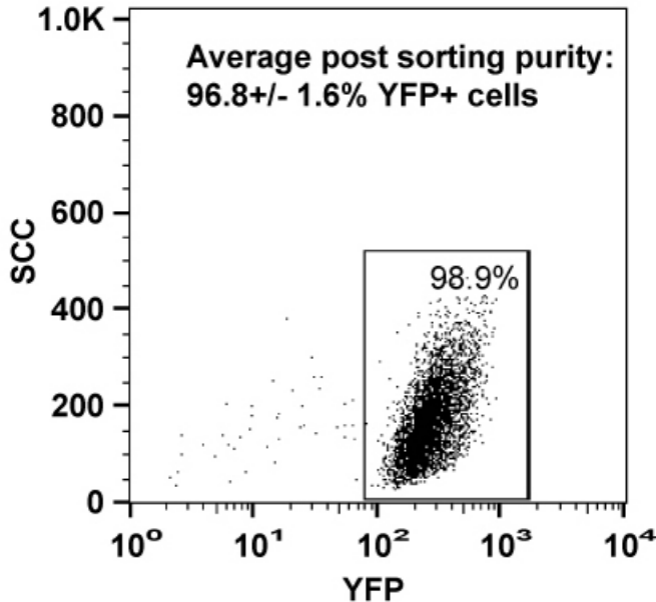

Supplementary Figure 1, Russ et al.

**A**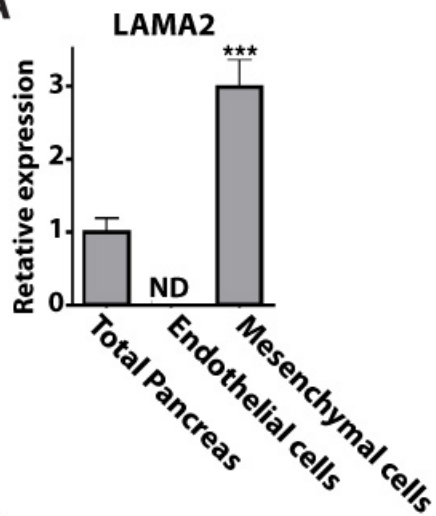**B**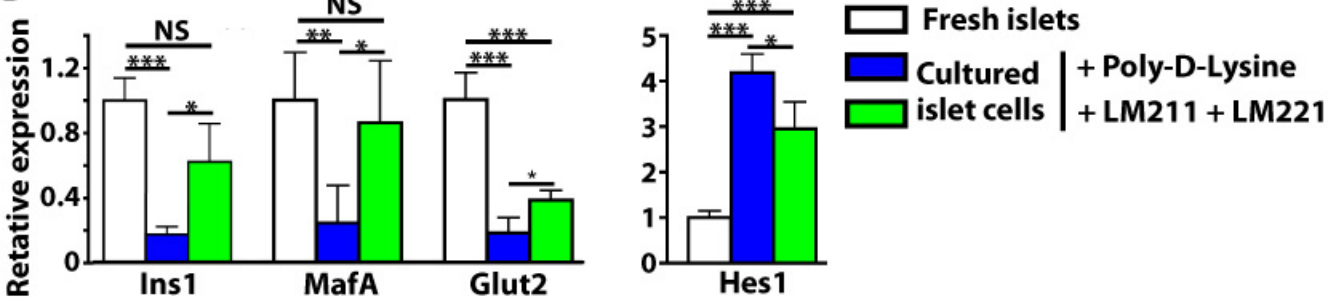

Supplementary Figure 2, Russ et al.

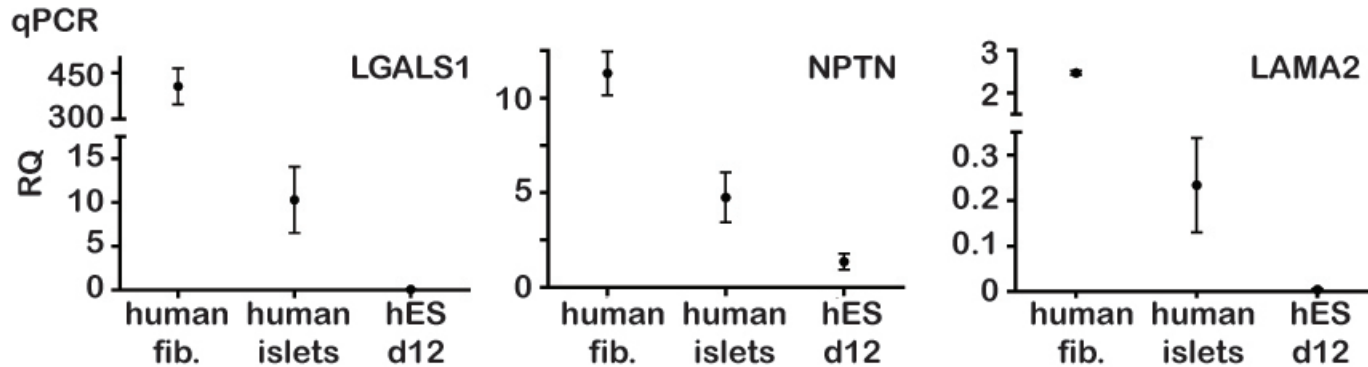

Supplementary Figure 3, Russ et al.
